1 Harnessing methods, data analysis, and near-real-time wastewater monitoring for enhanced public  
2 health response using high throughput sequencing.

3 Padmini Ramachandran<sup>1\*</sup>, Tunc Kayikcioglu<sup>1,2</sup>, Tamara Walsky<sup>1</sup>, Kathryn Judy<sup>1</sup>, Jasmine Amirzadegan<sup>1</sup>,  
4 Candace Hope Bias<sup>1</sup>, Bereket Tesfaldet<sup>1</sup>, Maria Balkey, Dietrich EppSchmidt<sup>1,2</sup>, Hugh Rand<sup>1</sup>, James  
5 Pettengill<sup>1</sup>, Sandra Tallent<sup>1</sup>, Eric Brown<sup>1</sup>, Tina Pfefer<sup>1</sup>, Ruth Timme<sup>1</sup>, Amanda Windsor<sup>1</sup>, Christopher  
6 Grim<sup>1</sup>, and Maria Hoffmann<sup>1</sup>

7 1. Center for Food Safety and Applied Nutrition, Food and Drug Administration, Office of  
8 Regulatory Science, Division of Microbiology, HFS-712, 5001 Campus Drive, College Park, MD  
9 20740, USA.

10 2. Joint Institute for Food Safety and Applied Nutrition, University of Maryland, 5825, University  
11 Research Ct, Suite 1400, College Park, MD, USA.

12

13 Address correspondence to:

14 Padmini Ramachandran  
15 5001, Campus Drive, 4E-019,  
16 College Park, MD- 20740.

17 Ph no: 3017960610

18 Email: [Padmini.ramachandran@fda.hhs.gov](mailto:Padmini.ramachandran@fda.hhs.gov)

19

20

21

22

23

24

25 **Abstract**

26 Wastewater-based analysis has emerged as a pivotal method for monitoring SARS-CoV-2 (SC2).  
27 Leveraging high-throughput sequencing on wastewater samples facilitates a comprehensive, population-  
28 level assessment of circulating and emerging SC2 variants within a community. This study meticulously  
29 evaluates the detection performance, variant calling accuracy, and the time taken from sample  
30 collection to public data release for wastewater SC2 monitoring. We employed two different SC2 target  
31 enrichment panels on Illumina MiSeq and Oxford Nanopore Technologies (ONT) GridION sequencing  
32 platforms for a robust analysis. Daily collection of routine raw grab and composite samples took place at  
33 a wastewater treatment plant (WWTP) site in Maryland, USA (MD) from mid-January 2022 to the end of  
34 June 2022. Total Nucleic Acid (TNA) was extracted from samples and target enrichment was executed  
35 using QIAseq DIRECT and NEBNext VarSkip Short amplicon kits, with subsequent sequencing on MiSeq  
36 or ONT GridION platforms, respectively. Obtained sequences was analyzed using our custom CFSAN  
37 Wastewater Analysis Pipeline (C-WAP). Raw sequence data and detailed metadata were submitted to  
38 NCBI (BioProject PRJNA757291) as it became available. Our wastewater data successfully detected the  
39 onset of new variants BA.2, BA.2.12, BA.4.6, and BA.5 to the observed population. Notably, Omicron  
40 sub-variants were identified approximately a week ahead of publicly available clinical data at the MD  
41 ZIP-code level. Variation in quality metrics paralleled the rise and fall of BA waves, underscoring the  
42 impact of viral load on sequencing quality. Regular updates of estimated variant proportions were made  
43 available on the FDA-CFSAN "Wastewater Surveillance for SARS-CoV-2 Variants" website. In contrast to  
44 the median 28-day turnaround for our samples, the lead time from sample collection to public release of  
45 raw sequence data via NCBI was remarkably swift, accomplished within a mere 57 hours in this specific  
46 exercise. Our processing, sequencing, and analysis methods empowered the swift and accurate  
47 detection of SC2 trends and circulating variants within a community, offering insights for public health  
48 decision-making.

49 **Keywords**

50 Wastewater, surveillance, SARS-CoV-2, sequencing

51 **Abbreviations**

52 SARS-CoV-2 (SC2), Wastewater treatment plant (WWTP), Total Nucleic Acid (TNA), CFSAN Wastewater

53 Analysis Pipeline (C-WAP).

54

55

56

57

58

59

60

61

62

63

64

65

66

67

## 68 **Introduction**

69           Clinical variant determination of SARS-CoV-2 (SC2) relies on the detection of genomic elements  
70 of SARS-CoV-2 by reverse transcription-quantitative polymerase chain reaction (RT-qPCR) based  
71 methods from individual patients (1, 2). Clinical analyses are now also being complemented with  
72 antibody-based assays that provide an indication of current or previous exposure to SC2 (3). High-  
73 throughput sequencing technologies are being used to sequence the SC2 genome from a subset of the  
74 infected population (4, 5). This has resulted in a large number of published genomes, and has provided  
75 insight into its origins, spread, evolution, and diversity via computational approaches in genomic  
76 epidemiology (1). However, inferring lineage prevalence by clinical testing is infeasible at scale,  
77 especially in areas with limited testing and/or sequencing capacity or limited community participation,  
78 both of which can introduce sampling biases (4).

79           Utilizing wastewater samples to identify pathogenic human viruses, including SC2, has gained  
80 attention as a method for understanding population-level trends in infections (3). SARS-CoV-2 RNA  
81 concentration in wastewater has been shown to convey regional infection dynamics and provides less  
82 biased abundance estimates than clinical testing (1, 3). As SC2 continues to spread and evolve, early  
83 detection of emerging variants is critical for orchestrating public health interventions.

84           There are many factors limiting wastewater-based genomic surveillance of pathogens. For  
85 example, despite the promising success of a few studies (6, 7), it is still challenging to understand how  
86 well wastewater-based epidemiology can identify the genetic diversity of SARS-CoV-2 in each population  
87 and how this relates to known viral diversity of clinical cases. This is especially important as new variants  
88 emerge (1). Many challenges also lie in the accurate identification of SC2 variants and estimation of their  
89 abundance in mixed population samples such as wastewater. While deep sequencing without prior  
90 amplification may be efficient for viruses that reside in high quantity in plasma, in a mixed population of

91 variants and a complex environmental matrix like wastewater, sequencing without amplification is  
92 impractical (8). For wastewater-based viral detection, implementation of a multiplexed target  
93 enrichment panel is necessary. However, there are challenges in the analysis of sequencing reads from  
94 target enrichment panels for accurate identification of multiple variants in a single sample. Here we use  
95 an analysis pipeline, the CFSAN Wastewater Analysis Pipeline (C-WAP, [https://github.com/CFSAN-](https://github.com/CFSAN-Biostatistics/C-WAP)  
96 [Biostatistics/C-WAP](https://github.com/CFSAN-Biostatistics/C-WAP)), for identification and abundance estimation of circulating variants. As SC2 evolves  
97 and new variants arise, continued monitoring for emerging variants will be an important component of  
98 public health efforts (9). As the virus evolves, enrichment kits, databases of variants, and detection  
99 methods will also need to evolve and be re-evaluated to ensure the best possible methods are in use.

100         The application of high-throughput sequencing for the rapid identification and surveillance of  
101 pathogens has recently become common place in public health systems (10-12). The SC2 pandemic has  
102 helped bring WBE to the forefront of community-scale pathogen surveillance (7, 13). Here, we describe  
103 how monitoring wastewater from urban areas can be used to detect the arrival of emerging SC2 variants  
104 of SC2 in a chosen sewer shed. This study adapted two different target enrichment panels, initially  
105 designed for clinical samples, for application in wastewater samples. Additionally, both protocols were  
106 optimized and published to protocols.io (14). The study established critical quality control checkpoints  
107 within the laboratory workflow and on the analysis of sequence data derived from a mixed population of  
108 wastewater samples. The evaluation encompassed the detection performance and variant calling  
109 accuracy using two different SC2 target enrichment panels, covering 99.16 +/- 0.58% of the SC2 genome  
110 conducted on both Illumina MiSeq and Oxford Nanopore Technologies (ONT) GridION sequencing  
111 platforms. A crucial aspect explored was the turn-around-time from sample collection to public data  
112 release, recognizing its significant public health impact. The findings demonstrated the effectiveness of  
113 high-throughput sequencing of SC2 genomes from wastewater. The incorporation of precision analysis

114 tools, such as C-WAP, facilitated the early detection of emerging variants of concern in wastewater  
115 samples.

116 In summary, this study emphasizes the need for community-based surveillance, complemented  
117 by rigorous and comprehensive analysis and investigation. The thorough analysis when assessing the  
118 performance of enrichment panels employed here, considering the interplay between the enrichment  
119 panel itself and the specific sequencing technology, is extremely valuable. This study utilized a  
120 comprehensive wastewater analysis pipeline, crafted for real-time surveillance of mixed population  
121 samples that took into consideration several aspects of targeted amplicon-based sequencing,  
122 implemented strict QC measures to avoid false positives, critically assessed emerging variants by looking  
123 at the characteristic mutations, and evaluated several genome coverage metrics across the genome. The  
124 insights gained from this study offer valuable lessons applicable to wastewater surveillance  
125 methodologies targeting emerging pathogens.

## 126 **Materials and Methods**

### 127 **Sample collection**

128 Wastewater samples were collected from a wastewater treatment plant in Maryland from  
129 January 12, 2022, to June 28<sup>th</sup>, 2022. The raw wastewater was collected daily from January 12<sup>th</sup> to  
130 February 28<sup>th</sup>, 2022 as two 1-liter raw grabs (2 biological reps) in Nalgene bottles and stored at 4°C. The  
131 samples were retrieved weekly and subsequently stored at 4°C until use. From January 12 to February  
132 28<sup>th</sup>, 2022, raw wastewater grab samples were extracted and analyzed as individual samples with 2  
133 biological replicates for each day resulting in 14 samples per week.

134 Composites were collected as 1L grabs from Feb23<sup>rd</sup> 2022 till June 28<sup>th</sup>, 2022. Composites were  
135 aliquoted from the auto sampler (auto sampler has a collection interval of 30 mins for 24hrs) as two-1L  
136 grabs in Nalgene bottles and stored at 4°C until use. Each biological replicate per week after pooling was

137 then split into three 40mL technical replicates, resulting in six samples per week (Supplementary table 1,  
138 Schematic Fig 1). The complete workflow for this study is described in detail in Fig1.

### 139 **Total nucleic acid extraction and SARS-CoV-2 RT-qPCR detection**

140 Sample concentration and total nucleic acid extraction was performed on the pooled  
141 wastewater using Maxwell RSC Enviro TNA Kit (Promega, Madison, WI USA) following manufacturer's  
142 recommendations. The extracted total nucleic acid was stored at -20 C for short term (a week) to  
143 process for the cDNA generation and RT-qPCR. After the necessary amount was aliquoted, the TNA was  
144 stored at -80 C for long term storage. The detailed protocol has been published in  
145 [dx.doi.org/10.17504/protocols.io.rm7vzy52xlx1/v1](https://doi.org/10.17504/protocols.io.rm7vzy52xlx1/v1).

146 The quantification of SARS-CoV-2 in wastewater was performed utilizing the Promega GoTaq®  
147 Enviro Wastewater SARS-CoV-2 System, which targets the N1 gene (Promega, Madison, WI USA)  
148 following manufacturer's recommendations. This includes guidance for converting RT-qPCR output into  
149 calculated viral genome copies per liter.

### 150 **DNA digestion and cDNA synthesis**

151 Genomic DNA was digested with ezDNase (Invitrogen, Waltham, MA USA) with protocol  
152 modifications. Reaction cocktails consisted of 10uL template TNA, 2µL nuclease free water, 1µL  
153 ezDNase™ buffer, and 1 µL ezDNase™ enzyme. Reactions were then digested at 37°C for 5 minutes.  
154 Digestion was stopped by addition of 1µL 10mM DTT and a 5-minute incubation at 55°C. Reactions were  
155 chilled on ice for at least 1 minute before proceeding to cDNA synthesis.

156 cDNA was synthesized from the purified RNA with the Superscript IV Reverse Transcriptase  
157 (Invitrogen, Waltham, MA, USA) with modifications to the manufacturer protocol. Primer annealing was  
158 carried out with 1µL 50µM random hexamers, 1uL 10mM dNTP mix, 1µL DEPC-treated water, and 10µL

159 template RNA. Reactions were incubated at 65°C for 5 minutes, then incubated on ice for at least 1  
160 minute. The Reverse Transcriptase reaction mix was prepared with 4µL 5x SSIV Buffer, 1 µL 100mM DTT,  
161 1µL RNaseOUT™ Recombinant RNase Inhibitor, and 1µL SuperScript IV Reverse Transcriptase (200U/µL)  
162 and then added to the chilled primer-annealed RNA. Reactions were then incubated at 23°C for 10  
163 minutes, 50°C for 30 minutes, then 80°C for 10 min. cDNA was stored at -20°C until use.

#### 164 **Selection of enrichment panels for this study.**

165         October through December 2021, we evaluated some commercially available SC2 enrichment  
166 panels. Enrichment panels for assessment were chosen based on multiple criteria. Our main objective  
167 was to ensure even coverage across the genome; therefore, we chose kits with tiled amplicon across the  
168 entire SC2 genome and simple library preparation of these amplicons to achieve rapid, simple, and cost-  
169 effective sequencing. Read lengths of the amplicon to adapt to both short read sequencing chemistry  
170 and long read sequencing chemistry were also considered. The commercial enrichment panels that were  
171 assessed initially included Midnight FREED primers (1200 bp long amplicons with Oxford Nanopore  
172 library and sequencing) (15), SWIFT SNAP additional genome coverage panel (150 bp long amplicons  
173 with Illumina MiSeq sequencing) (16), NEBNext VarSkip Short primers (560 bp long, with possibility of  
174 sequencing in both Illumina and ONT platform) (17), and QIAseq DIRECT enrichment panel (250 bp  
175 amplicons with Illumina MiSeq sequencing). Based on the ease of generating the amplicons, ease of  
176 library preparation and adaptability of the amplicons with different sequencing platforms we chose two  
177 enrichment panels for this study that are discussed in detail in this manuscript, QIAseq DIRECT and  
178 NEBNext VarSkip Short (NEB VSS). The QIAseq DIRECT panel has 222 primer pairs with average amplicon  
179 length of 250 bp while the NEB VSS panel has 74 primer pairs with an amplicon length of about 560 bp,  
180 on average.

#### 181 **QIAseq DIRECT SARS-CoV-2 enrichment panel**



182 cDNA amplification was performed using QIAseq DIRECT SARS-CoV-2 enrichment panel  
183 following manufacturer's protocols. After the emergence of variant BA.5, (June 13<sup>th</sup>, 2022), the  
184 manufacturer distributed an auxiliary primer set as a spike-in to the existing protocol. The samples from  
185 May 17<sup>th</sup> and onward were amplified using the spike-in to the enrichment panel. The detailed protocol  
186 is publicly available at [dx.doi.org/10.17504/protocols.io.rm7vzy39rlx1/v4](https://dx.doi.org/10.17504/protocols.io.rm7vzy39rlx1/v4)

#### 187 **NEB VSS SARS-CoV-2 enrichment panel**

188 cDNA amplification was performed utilizing the NEB VSS SARS-CoV-2 enrichment panel following  
189 manufacturer's protocol. Due to the emergence of BA.2.12, there was a change in the primer version  
190 from VSS v1a to VSS v2a starting from the week of March 1st. There was also a spike-in introduced in  
191 the primer pairs as an update to the kit due to the emergence of BA.5. The samples from the week of  
192 May 11<sup>th</sup> and onward were amplified using the enrichment panel with spike-in. The detailed protocol is  
193 publicly available at [dx.doi.org/10.17504/protocols.io.3byl4bwervo5/v2](https://dx.doi.org/10.17504/protocols.io.3byl4bwervo5/v2)

#### 194 **High throughput Sequencing**

195 QIAseq DIRECT amplicons were sequenced using Illumina MiSeq (Illumina, San Diego, CA). NEB  
196 VSS amplicons were sequenced using Oxford Nanopore GridION sequencing (Oxford Nanopore  
197 Technologies, Oxford, UK). Every sample (n = 182) was amplified using both QIAseq DIRECT SARS-CoV-2  
198 enrichment panel and NEB VSS SARS-CoV-2 panel (n=364). The libraries of NEB VSS amplicons were  
199 prepared using ligation sequencing kit (Oxford Nanopore Technologies Ligation Sequencing Kit (SQK-  
200 LSK109), Cambridge, UK) as described in the publicly available protocol  
201 [dx.doi.org/10.17504/protocols.io.3byl4bwervo5/v2](https://dx.doi.org/10.17504/protocols.io.3byl4bwervo5/v2) run on a R.9.4 flow cell (R9.4.1) for 72h.

#### 202 **Data analysis, quality metrics and variant calling**

203 To address the many challenges in accurate identification of multiple variants, we further  
204 customized our analysis tool CFSAN Wastewater Analysis Pipeline (C-WAP)(9) . The latest version of C-  
205 WAP is now available on GitHub <https://github.com/CFSAN-Biostatistics/C-WAP>. Briefly, sequences are  
206 aligned to the reference genome (Wuhan-Hu-1, NCBI assembly ASM985889v3, NC\_045512.2) using  
207 Bowtie2 (v2.4.5) and Minimap2 (v2.24), followed by adapter trimming and quality filtering in iVar  
208 (v1.3.1). When processing Illumina data, the iVar trim function was configured to discard the adaptor  
209 sequences; filter sequences below a quality score of 20 (default); filter reads that are shorter than 50%  
210 of the average length of the first 1000 reads (default); and use a 4 bp sliding window (default). For ONT  
211 data, iVar trimming is configured the same, with the exception that all sequences are retained (quality  
212 score filter of 1), effectively preserving the filtering of reads to a quality score of 7 performed by Guppy,  
213 the default intrinsic base caller onboard ONT MinKNOW sequencing software.

214 C-WAP provides three methods for variant calling: Kraken2 (v2.1.2) / bracken (v2.7), kallisto  
215 (v0.48), and a Samtools (v1.15) pileup piped into Freyja (v1.4.4). Bracken is a Bayesian abundance  
216 estimator based on Kraken2 sequence calls. A comprehensive list of dependencies for C-WAP is available  
217 in the GitHub readme.

218 C-WAP takes into account the number of raw reads that align to the reference sequence and  
219 pass filter, *i.e.*, read lengths after adaptor trimming  $\geq 30$  and minimum read quality  $\geq 20$  within a sliding  
220 window of width 4 bases. C-WAP outputs a comprehensive report along with several distinct quality  
221 metrics (Table 1). These include the percent of reads aligned to SARS-CoV-2 genome, coverage depth of  
222 the sequencing reads at every genomic coordinate of the SARS-CoV-2 genome, read quality, coverage  
223 depth over the entire breadth of the SARS-CoV-2 genome, absolute counts of genomic coordinates with  
224 less than 10X coverage or no coverage, scaled counts of genomic coordinates that with less than 10X  
225 coverage or no coverage, and variant abundance estimation using Freyja, kallisto, and Kraken.

226 Characteristic mutations for several variants, including variants B.1.617.2, BA.1, BA.2, BA.3,  
227 BA.4, and BA.5 (18), the variants of concern most relevant to the timeframe of this study, were  
228 extracted from the C-WAP report (Supplementary table 2). The table is generated under the assumption  
229 that the presence of a variant requires the detection of all mutations of a particular variant. The  
230 characteristic mutations which support the presence of a particular variant are indicated in the  
231 respective column of the table. A detected mutation table with detection frequency and p-values for  
232 every alternate base in each position is generated where only the genomic coordinates with at least 10X  
233 coverage were considered.

#### 234 **Concordance correlation coefficient**

235 A concordance correlation coefficient (CCC) with Euclidean distance was used to evaluate the  
236 levels of pairwise agreement among the abundance estimation methods for both amplicon panels, NEB  
237 VSS and QIAseq DIRECT. It was adapted by Cui et al. (19) from Lin's concordance correlation coefficient  
238 for agreement studies with microbiome compositional data. CCC has values between -1 and 1, where -1  
239 indicates a perfect disagreement, 1 indicates a perfect agreement, and 0 indicates a complete absence  
240 of agreement between the two abundance estimation methods. Bayes-Laplace Bayesian-multiplicative  
241 replacement method (20) is used to impute zero relative abundances on the entire dataset before  
242 computing CCC values. A bootstrap method with sample size of 5,000 is used to build a 95% confidence  
243 interval for each CCC estimate.

244 To understand the agreement between the variant callers on real world data, in the amplicon  
245 panels used in this study, for the CCC analysis a subset of (n= 11) samples were chosen. The sample  
246 chosen for this analysis were samples collected on the week of May 5<sup>th</sup>, 2022 (6 samples) and the week  
247 of June 28<sup>th</sup>, 2022 (5 samples). The 11 samples/22 sequences (with each sample being amplified with  
248 NEB VSS and QIAseq DIRECT and sequenced in ONT and Illumina MiSeq respectively) were chosen based

249 on sequence reads having uniform coverage across the genome, good breadth versus depth metric and  
250 higher percent covid hits. For the week of May 5th samples, the amplicon panels lacked the spike-in  
251 primers. In this instance, the basic panel successfully identified the circulating variants at the time. For  
252 the June 28th samples, both amplicon panels were equipped with updated spike-in primers capable of  
253 detecting the prevailing variant circulating at that time.

#### 254 **Dashboard display**

255 Sequencing data that passed QC assessment (category A and B, Table 1) were submitted in real  
256 time to National Center for Biotechnology Information (NCBI) for active monitoring for circulating  
257 variants. To facilitate the sharing of information about progress on this sequencing effort, FDA  
258 developed a dashboard that graphically presented findings from this project (21). Active support and  
259 updates to the dashboard ended on June 30, 2023, the final state of the dashboard remains available at  
260 [https://www.fda.gov/food/whole-genome-sequencing-wgs-program/wastewater-surveillance-sars-cov-](https://www.fda.gov/food/whole-genome-sequencing-wgs-program/wastewater-surveillance-sars-cov-2-variants)  
261 [2-variants.](https://www.fda.gov/food/whole-genome-sequencing-wgs-program/wastewater-surveillance-sars-cov-2-variants)

#### 262 **Data visualization:**

263 Downstream data analysis and visualization were carried out in RStudio (v.1.3.1093) using the  
264 following R packages: ggplot2 (v3.4.1), dplyr (v1.1.0), reshape2 (1.4.4), ggh4x, and stringr (v1.5.0).

#### 265 **Data availability:**

266 Data generated in this study were deposited in the NCBI BioProject database under the  
267 BioProject accession number PRJNA757291.

#### 268 **Results**

#### 269 **SARS-CoV-2 viral load and relationship to clinical cases:**

270 The viral load of SARS-CoV-2 in wastewater was assessed throughout the time course of this  
271 study to understand the impact of viral burden levels and dynamics on amplicon sequencing success and  
272 output. Computed viral load, calculated from RT-qPCR on samples taken from the wastewater  
273 treatment plant, ranged from 350 genome copies/L to 99,840 genome copies/L, with fluctuations that  
274 mirrored variant waves (Fig 2). To understand the relationship of wastewater-based surveillance burden  
275 estimations and actual clinical reporting, clinical data were plotted against the viral genome copies/L  
276 over time (Fig 2, Supplementary table 3). The rolling 7-day average of new clinical SARS-CoV-2 cases for  
277 the two ZIP codes (21157 and 21158) served by the wastewater treatment plant was extracted from MD  
278 department of Health website, [https://opendata.maryland.gov/Health-and-Human-Services/MD-COVID-19-Cases-by-ZIP-Code/ntd2-dqpx/data\\_preview](https://opendata.maryland.gov/Health-and-Human-Services/MD-COVID-19-Cases-by-ZIP-Code/ntd2-dqpx/data_preview).  
279 When compared to the reported clinical cases, which  
280 ranged anywhere between 1 case per week to 866 cases per week, we observed a seemingly lower rate  
281 of clinical testing from March 2022 onward (Fig 2).

### 282 **Percent reads aligned vs genome copies of SARS-CoV-2**

283 Weekly average percent reads aligned to the SC2 genome using both enrichment panels (n=364)  
284 were compared against the weekly average SC2 genome copies per liter of wastewater detected by RT-  
285 qPCR (Fig 3). The average percent reads aligned to the SARS-CoV-2 genome from weekly sampling  
286 roughly corresponds to the genome copies/L in wastewater from the corresponding time period,  
287 emphasizing the dependence of high quality SC2 genome amplicon sequencing on circulating viral load.  
288 The lowest percent reads aligned were observed during February and March 2022 when SARS-CoV-2  
289 was relatively scarce, but percent reads aligned increased beginning in April, with the surge of the  
290 Omicron variants, through the end of the monitoring period for this study, June 2022.

### 291 **Comprehensive QC metric analysis**

292 To characterize sequencing performance, C-WAP outputs a comprehensive report with several  
293 distinct quality metrics including the aforementioned percent reads aligned to the SC2 genome,  
294 coverage depth of the sequencing reads at every genomic coordinate of the SC2 genome, read quality,  
295 read counts for each primer pair of the amplicon panel, coverage depth over the entire breadth of the  
296 SC2 genome, absolute counts of genomic coordinates with less than 10X coverage or no coverage,  
297 scaled counts of genomic coordinates that with less than 10X coverage or no coverage, and variant  
298 abundance estimation using Freyja, kallisto, and Kraken (Supplementary report 1, 2). The following  
299 sections includes detailed results of the metrics considered by C-WAP for the samples discussed in the  
300 study.

#### 301 **Coverage depth vs coverage breadth:**

302 We compared sequencing depth versus breadth of the SC2 genome for both amplicon kits,  
303 QIAseq DIRECT and NEB VSS. The ideal sequencing run would have the maximum sequencing depth  
304 (greatest number of reads aligned) over the entire breadth (100%) of the genome, indicating even  
305 coverage over all genomic coordinates. Across the time course of this study, the coverage depth versus  
306 breadth for each amplicon kit used for each month of wastewater surveillance (Fig 4) improved as we  
307 optimized our sample collection and sequencing methods, with values for the metric converged towards  
308 the ideal in June compared to January. Comparison of the amplicon panels shows that the NEB VSS  
309 panel has lower genome coverage when compared to the QIAseq DIRECT panel for January and  
310 February, but by June the breadth versus depth for all sequencing runs are similar between amplicon  
311 kits.

#### 312 **Genome coverage across ORF1ab, S, M, and N genes of SC2 genome:**

313 Calculations of absolute and scaled coverage for each nucleotide site within all SC2 genes (5'  
314 UTR, ORF1ab, S, ORF3a, E, M, ORF6, ORF7ab, ORF8, N, ORF10, 3'UTR) was extracted from the C-WAP

315 report. Genome coverage for four key genes, namely ORF1ab, S, M and N genes, was used to detect  
316 characteristic mutations of the variants from January through June 2022 (Fig 5) during this study. Both  
317 NEB VSS and QIAseq DIRECT enrichment panels had more under-covered (<10x) sites within the S gene  
318 when compared to coverage of the remaining three key genes. 255 samples enriched by QIAseq DIRECT  
319 showed under-coverage in the S gene, versus an average of 166 samples for the other three key genes,  
320 while 109 samples enriched by NEB VSS showed S gene under-coverage, versus an average 92.3  
321 samples? for the other three genes. An overall poor performance of QIAseq DIRECT on the M gene was  
322 observed across all months of sampling, when compared to NEB VSS, with the average scaled M gene  
323 under-coverage across all QIAseq DIRECT samples 117% greater than that of NEB. In contrast, the NEB  
324 VSS amplicon panel was observed to have more under-covered sites on ORF1ab and N genes across all  
325 months of sampling—78% and 13% greater average scaled under-coverage, respectively.

### 326 **Concordant Correlation Coefficient**

327 To further assess performance and agreement between the two amplicon panels and the  
328 variant callers used in this study, we computed concordant correlation coefficients (CCC) to compare the  
329 performance of the top two variant callers (9), Freyja and kallisto, using a subset of high-quality  
330 sequenced samples, determined by having good QC metrics with uniform coverage across the genome  
331 (Fig 6). The CCC was positive for each kit, though under 0.25 for each, indicating mild agreement  
332 between the variant callers (Fig 6). The CCC between the variant callers was relatively higher for QIAseq  
333 DIRECT samples (0.2113 as opposed to 0.0102 for NEB VSS) and had a 95% confidence interval that did  
334 not span 0, indicating a statistically significant agreement. In contrast, the CCC for NEB VSS samples had  
335 a 95% confidence interval spanning 0, indicating there is likely no relationship between the variant  
336 detection calls by Freyja and kallisto. Accordingly, this suggests that for NEB VSS samples with GridION  
337 sequencing, one variant caller may be a better choice than the other to produce the most accurate

338 results, while for QIAseq DIRECT samples with MiSeq sequencing, the choice of variant caller may be less  
339 important.

#### 340 **Circulating variant estimation:**

341 During the sampling period, our surveillance system not only captured the major and minor  
342 variants circulating within the community but also detected the emergence of new variants. We  
343 combined the variant results from all 364 sequences from 182 samples, agnostic to the kit and  
344 sequencing platform used, to observe the general trend of circulating variants using Freyja as its  
345 database is updated more frequently. The MD wastewater samples clearly identified the emerging  
346 variants of concern like BA.1, BA.2.12, BA.4.6 and BA.5 from January 2022 through June 2022 (Fig 7,  
347 Supplementary Fig 1). Omicron BA.1 was the dominant circulating variant when the wastewater  
348 sampling began in January 2022. January 29<sup>th</sup> samples showed signs of emergence of BA.2, and  
349 dominant detection of BA.2 was observed from March 30<sup>th</sup>, 2022. BA.2.12 was detected starting from  
350 end of March 2022, followed by BA.4 and BA.5 in mid-May, and dominantly detected starting end of  
351 May 2022. We also observed traces of BA.4.6 in mid to late June, agreeing with the onset of BA.4.6 in  
352 clinical cases in Maryland.

#### 353 **Early detection of BA.2:**

354 The BA.2 lineage was first detected in samples collected on January 29<sup>th</sup>, 2022, and again on  
355 January 31, 2022 with both the NEB VSS and QIAseq DIRECT enrichment panels. The first clinical  
356 reporting of the BA.2 lineage in the entire state of MD by the CDC was on January 27<sup>th</sup>, 2022 (variant  
357 data is not available per zip code). To verify the early detection of BA.2 in these wastewater samples,  
358 every mutation identified using both enrichment panels was examined for six days (January 27<sup>th</sup>–  
359 February 1<sup>st</sup>) surrounding the first purported appearance of BA.2 (Fig 8A). Detected mutations for each  
360 day were categorized based on their presence/absence in BA.1 and BA.2 lineage sequences. Mutations



361 shared between BA.1 and BA.2 in the characteristic mutation table generated by C-WAP were marked as  
362 “BA.1 or BA.2” mutations. Identified mutations that are not present in BA.1 were categorized as  
363 “Incompatible with BA.1” and mutations only present in BA.2 were categorized as “BA.2 diagnostic  
364 mutations.” All mutations detected were considered statistically significant ( $p$ -value < 0.05) and present  
365 in at least 10 sequencing reads.

366 The prevalence of these three mutation categories on both enrichment panels on each of four  
367 days in January and in March 2022, when BA.2 was well established, was visualized by showing the  
368 frequency of each mutation and its place in the SARS-CoV-2 genome (Fig 8B). The landscape of relevant  
369 mutations on both early BA.2-detection days (January 29<sup>th</sup> and 31<sup>st</sup>) is highly similar to the pattern of  
370 mutation prevalence and detection in March, when BA.2 was consistently present in both wastewater  
371 and clinical samples. BA.2 diagnostic mutations were detected with frequencies up to at least 0.5 in  
372 some samples, while most detected BA.1-incompatible mutations were present with frequency of 0.25  
373 or greater.

374 In contrast, the mutations detected on January 28 include no BA.2 diagnostic mutations and  
375 BA.1-incompatible mutations are largely present in low frequency. This shows the presence and  
376 frequency of BA.2 diagnostic mutations and the overall profile of mutations observed at the early  
377 detection dates, January 29<sup>th</sup> and 31<sup>st</sup>, mimic that from a later sample, from March 30<sup>th</sup>, when BA.2 was  
378 known to be present in the WWTP service area.

### 379 **Realtime submission of surveillance data:**

380 After the sequencing protocol was optimized and QC metrics were in place, we made an effort  
381 to quantify the minimum time from sample collection to sequence analysis and release. Composite  
382 grabs for the week of June 28<sup>th</sup>, 2022, were collected at 6 am from the treatment plant and the time to  
383 process these samples was recorded. Total nucleic acid extraction, cDNA synthesis, amplification using

384 NEB VSS enrichment panel, and loading of the libraries on to Oxford Nanopore GridION took 30hrs. After  
385 16hrs, we had collected sufficient sequence data that passed QC to detect all the characteristic and  
386 diagnostic mutations for BA.5. Data analysis using C-WAP, upload of this data to NCBI, and display on the  
387 dashboard took 11 hrs. The total turnaround time from sample collection to dashboard display was  
388 57hrs.

## 389 **Discussion**

390 Six months of wastewater surveillance, made possible through the partnership with a  
391 wastewater treatment plant in Maryland, detected new variants as they emerged along with major and  
392 minor variants circulating in the community. From a clinical perspective, this level of resolution of  
393 community disease dynamics could underpin traditionally monitored clinical testing and help public  
394 health officials to serve communities more efficiently. A wastewater surveillance system fills data gaps  
395 for areas where clinical testing and surveillance may be limited, including underserved communities  
396 with limited access to testing sites.

397 The laboratory and bioinformatic methods employed in this study confidently detected multiple  
398 circulating SARS-CoV-2 (SC2) variants in wastewater samples using amplicon-based targeted enrichment  
399 panels. Several enrichment panel kits were evaluated, but only two, the QIAseq DIRECT and NEB VSS  
400 panels were pursued as the best options for wastewater samples.

401 The viral load in wastewater, when compared to the clinical cases, indicated a low rate of clinical  
402 testing as the pandemic began to wane (Fig 2). In other words, there were higher levels of SC2 in the  
403 community, based on wastewater analysis, than were being estimated based on reports from clinical  
404 testing. This is perhaps because at-home test kits became widely available within the community around  
405 the same time as this study commenced. From wastewater data, it is evident that clinical testing did not  
406 fully capture the wave of infections during early April to June 2022 (Fig 2). A limit of detection with

407 genome copies/L to the SC2 hits was not established and so all samples were sequenced regardless of  
408 RT-qPCR result (22). Having strict QC measure in place helped us to overcome this lack of a robust RT-  
409 qPCR LOD threshold and eliminate some poorly performing samples attributed to the lower genome  
410 copies/L.

411 A main goal of wastewater surveillance is to track emerging and circulating variants at a  
412 community level and hopefully provide an early warning signal of emerging and increasing infections  
413 without the need for community clinical information. For example, we detected BA.2 ahead of the  
414 clinical findings for the state. It is important to note that the variant calls are published only at the state  
415 level by CDC, not at the ZIP code level. Here we detected BA.2 at the community level covering two ZIP  
416 codes 14 days ahead of BA.2 variant calls published by CDC at the state level for Maryland. This  
417 emphasizes an ability of community level surveillance using wastewater: enabling a more focused public  
418 health local response during a pandemic.

419 In SC2 variants, mutations across the S-gene play a crucial role in variant calling. Research is  
420 ongoing to elucidate the mechanisms involved but the mutations may boost infectivity and  
421 transmissibility through increased spike density, enhanced cleavage and host cell uptake, and increased  
422 viral load and ability to evade host immune responses (23). Mutations may also interfere with laboratory  
423 testing and complicate epidemiological monitoring by interfering with detection in sequence-based  
424 tests. If a mutation occurs in the part of the viral genome assessed by a PCR test, the sample may result  
425 in gene “dropout.” We observed a significant drop in coverage of the S gene with the NEB VSS panel on  
426 the week of May 11. For this same week, RT-qPCR of these samples had 90,587 genome copies/L  
427 indicating a high SC2 viral load in the community (the range of genome copies for the duration of this  
428 study was from 350 genome copies/L to 99840 genome copies/L). The significant drop in S gene  
429 coverage raised concerns and the vendor was contacted and spike-in to the primer pool 1 was obtained  
430 to overcome the dropout due to the rise of BA.5 sub variants. When we repeated the amplification and

431 sequencing of samples from the week of May 11 using the primer spike-in (NEB VSS), we observed  
432 improved coverage on the S gene because of the three characteristic mutations (S:S371F, S:T376A,  
433 S:D405N) detected with the spike-in that were not detected with the original primer panel.

434 A diagnostic mutation of BA.5 in the M gene (M:D3N) was first detected the week of May 11  
435 with QIAseq DIRECT enrichment panel. This same mutation was not detected until the week of June 1  
436 using NEB VSS enrichment panel. A spike-in for the QIAseq DIRECT enrichment panel was introduced  
437 from the week of June 13. The spike-in primers in the QIAseq DIRECT panel had a slightly higher  
438 concentration of primers compared to its original panel across this region (23082-23144 bp). While  
439 there was not a full dropout in this region (23082-23144 bp), the observed coverage was lower, and the  
440 concentration of the primers (QIAseq\_170\_RIGHT, QIAseq\_172\_LEFT, and QIAseq170-2\_RIGHT) were  
441 increased to provide more uniform coverage within that gene. Since mutations may affect detection,  
442 treatment, and prevention, it is important to identify strains correctly to direct public health  
443 containment strategies (5). To address this type of limitation, there are studies that incorporate targeted  
444 sequencing of only variable regions of interest in the genome, particularly those regions that contain  
445 mutations unique to specific variants of concern (5). In addition, there are studies that apply PCR  
446 amplifying, cloning, and sequencing a 1.5 kb region of the spike protein gene to confirm the linkage of  
447 mutations of interest to understand all the circulating variants in a complex sample (24). While these  
448 approaches provide valuable information on a very targeted genomic area where mutations are known  
449 to occur, mutations at other genomic coordinates, which might be indicative of emergent variants and  
450 variants, will not be obtained.

451 In practice, when a diagnostic or surveillance test is based on targeted amplification, for it to be  
452 able to detect variations in the genome of pathogens, it is necessary to regularly update the primer pairs  
453 and/or alter the target regions used in the detection systems or use several target genes of the  
454 infectious agent in the same test reaction to minimize the risk of false negative results (5). Both

455 enrichment panels evaluated in this study consistently updated the primer pairs for the detection of  
456 circulating variants. In an ARTIC primer approach where entire primer versions are updated, the  
457 emergence of new variants renders any remaining primers obsolete (25, 26). This stands in contrast to  
458 the spike-in approach, where the spike-in is introduced to the original pools, minimizing the  
459 regeneration of old primers and revitalizing their performance. Many enrichment panels contain  
460 degenerate primer designs of polymorphic regions of the genome to allow more robust amplification of  
461 variable strains. Also, strategically designed primer pairs for consistent coverage are essential for highly  
462 evolving genomes like SC2 (5). Keeping the challenges of uniform coverage within the targeted site,  
463 primer binding efficiency, and adaptation to several sequencing approaches in mind, choosing a suitable  
464 target enrichment panel and pairing it with the suitable library preparation kit based on the sequencing  
465 platform may play a critical role in identifying the circulating and emerging variants.

466         When we assessed genome coverage metrics for four key genes (ORF1ab, S, M and N genes),  
467 both QIAseq DIRECT enrichment panel and NEB VSS enrichment panel had substantial under-covered  
468 regions on the S gene when compared to the other three genes. In the NEB VSS SARS-CoV-2 enrichment  
469 panel, there are 10 primer pairs targeting the S gene (genome coordinates:21563-25384) with an  
470 overlapping primer pair included to enable detection of BA.5 specific mutations. The S gene is the most  
471 mutation-prone region of SC2 genome, which means that primer binding sites for this gene can play a  
472 major role in variant calling performance on a mixed sample like wastewater. For the M gene, the  
473 QIAseq DIRECT enrichment panel had lower coverage across all months when compared to NEB VSS  
474 enrichment panel (Fig 5). Two characteristic mutations within the M gene used to assess all Omicron sub  
475 variants correspond to primer binding regions in the QIAseq DIRECT enrichment panel, while neither  
476 mutation is in a primer binding region for NEB VSS. The QIAseq DIRECT enrichment panel has more  
477 amplicons with more primer pairs (222 primer pairs total, whereas NEB VSS panel has 74 primer pairs)  
478 and is more suitable for short read sequencing (~250bp amplicon length) which results in high coverage

479 across the genome. But there is a greater chance of mutations occurring in a primer binding site,  
480 especially for rapidly evolving genes, such as the S gene. The NEB VSS primer panel somewhat mitigates  
481 this with longer amplicon length (~560bp) and fewer primer pairs. Continuous evaluation of current and  
482 emerging target enrichment panels is essential to accurately detect existing and evolving SC2 variants  
483 from wastewater.

484 During the development of C-WAP, a critical performance assessment of various variant callers  
485 on *in silico* reads of mixed variants revealed that Freyja was the most suitable variant caller on short  
486 read data and kallisto was the most suitable variant caller for the long read data (9). The concordant  
487 coefficient analysis on our real-world data agreed with those previous findings (Fig 6) However, to  
488 solidify these conclusions, further investigations are warranted, particularly with a larger sample size.  
489 Additionally, considering the evolving nature of viruses, future studies should explore the impact of  
490 different amplification kits on variant calling accuracy.

491 We tested the feasibility of the real time submission of data to support the public health  
492 response. Real time submission and publication to the dashboard within 57 hours was possible because  
493 of real-time long read sequencing through Oxford Nanopore GridION. After just 16 hrs of sequencing,  
494 there was enough accumulated sequencing depth data that passed QC to provide high confidence in the  
495 accuracy of variant calling. Even though the run time in GridION was chosen to be 72hrs, most of the  
496 data were collected in the initial 20hrs after sequencing started. However, to ensure high quality data,  
497 we multiplexed only 9 samples per flow cell on GridION, compared to 28-32 possible samples on  
498 Illumina MiSeq. The Illumina MiSeq, despite its inherent speed limitations, presents promising prospects  
499 for near-real-time applications when Read1 data is being used. While just the Read1 data can  
500 successfully pass all quality control (QC) metrics, there is a subsequent delay of up to 24 hours for  
501 uploading the sequence data from a paired-end run, which might be advantageous for maximizing  
502 quality scores. It is important to understand the complexity associated with multiplexing samples per

503 flow cell, a factor that may necessitate adjustments based on the viral load. Our team has established  
504 best practices for the efficient collection, organization and surveillance of sequence data (21). Analyzing  
505 the turnaround time from sample collection to NCBI data release revealed a median duration of  
506 approximately 28 days for the samples in this study. However, this exercise has illuminated the potential  
507 for real-time data submission, enabling immediate surveillance insights. Regardless of the sequencing  
508 technology, near real time data submission is possible through wastewater surveillance which will  
509 support community level decision making easier during pandemic. Incorporation of automated liquid  
510 handling robots could further reduce time from sample receipt to data publication.

511           Due to the dynamic and swiftly evolving nature of SARS-CoV-2, our dedication to real-time  
512 dashboard updates and the dissemination of optimized protocols to the wastewater surveillance  
513 community, this study has some limitations. One limitation was the inability to delve into the genuine  
514 distinctions in raw wastewater and composites beyond a one-week sample analysis period where we  
515 explored both raw wastewater grabs (February 23<sup>rd</sup> to February 28<sup>th</sup>) and composite grabs (February  
516 23<sup>rd</sup> to February 28<sup>th</sup>). We needed to investigate the feasibility of weekly sample pooling as a strategy  
517 (February 28<sup>th</sup>, 2022, and onwards) to reduce the processing workload in our laboratory, and when we  
518 did not find any differences in the viral load and other QC metrics when the sequences, regardless of  
519 enrichment panel, were analyzed from that week, we proceeded with weekly sample pooling.  
520 Additionally, we were constrained in exploring the potential benefits of multiplexing varying sample  
521 quantities on GridION flow cells to comprehend sequencing depth. This study is also limited by not  
522 including an evaluation of other commercially available enrichment panels, such as ARTIC V4 or Resende  
523 (26, 27). Moreover, the study was hindered in its capacity to investigate spike-in studies with known  
524 concentration of the virus in various matrices, which are essential for establishing a true limit of  
525 detection.

526           The two amplicon panel kits demonstrated robust efficacy in detecting both circulating and  
527 emerging variants in wastewater samples. The two panels used in this study underwent sequencing on  
528 two distinct platforms, and to ensure accurate assessment, we established customized quality control  
529 (QC) metrics using C-WAP. Regarding variant calling, both enrichment panels successfully detected the  
530 presence of BA.2 on January 29<sup>th</sup>, 2022, samples and consistently detected other circulating variants  
531 throughout the study duration. The comprehensive analysis employed in this study emphasizes the  
532 importance of evaluating the performance of any enrichment panel in conjunction with the chosen  
533 sequencing technology.

#### 534 **Conclusion**

535 We supported the public health response effectively during the pandemic by constant method  
536 optimization, updates to the wet lab protocol, updates to the databases for the variant calling,  
537 comprehensive analysis, pairing up the enrichment panel with suitable sequencing technology,  
538 appropriate variant callers used throughout the surveillance, and the efficient updates of a dashboard.  
539 Finally, as seen here, our findings highlight the value of extensive data analysis metrics, method  
540 optimization, and a near-real-time public health response. These insights can serve as valuable  
541 considerations for decision-making in the establishment of new surveillance initiatives, especially those  
542 involving mixed samples and complex sample types such as wastewater. In essence, this study provides  
543 a blueprint for thoughtful consideration of various metrics when conducting surveillance using target  
544 enrichment panels, offering valuable lessons that can inform the development of future surveillance  
545 studies.

#### 546 **References**

547 1.       Karthikeyan S, Levy JI, De Hoff P, Humphrey G, Birmingham A, Jepsen K, et al. Wastewater  
548 sequencing reveals early cryptic SARS-CoV-2 variant transmission. *Nature*. 2022;609(7925):101-8.



- 549 2. Ahmed W, Bertsch PM, Bibby K, Haramoto E, Hewitt J, Huygens F, et al. Decay of SARS-CoV-2  
550 and surrogate murine hepatitis virus RNA in untreated wastewater to inform application in wastewater-  
551 based epidemiology. *Environ Res.* 2020;191:110092.
- 552 3. Achak M, Alaoui Bakri S, Chhiti Y, M'Hamdi Alaoui FE, Barka N, Boumya W. SARS-CoV-2 in  
553 hospital wastewater during outbreak of COVID-19: A review on detection, survival and disinfection  
554 technologies. *Sci Total Environ.* 2021;761:143192.
- 555 4. Fontenele RS, Kraberger S, Hadfield J, Driver EM, Bowes D, Holland LA, et al. High-throughput  
556 sequencing of SARS-CoV-2 in wastewater provides insights into circulating variants. *Water Res.*  
557 2021;205:117710.
- 558 5. Smyth DS, Trujillo M, Gregory DA, Cheung K, Gao A, Graham M, et al. Tracking cryptic SARS-CoV-  
559 2 lineages detected in NYC wastewater. *Nat Commun.* 2022;13(1):635.
- 560 6. Farkas K, Hillary LS, Malham SK, McDonald JE, Jones DL. Wastewater and public health: the  
561 potential of wastewater surveillance for monitoring COVID-19. *Curr Opin Environ Sci Health.* 2020;17:14-  
562 20.
- 563 7. Aguiar-Oliveira ML, Campos A, A RM, Rigotto C, Sotero-Martins A, Teixeira PFP, et al.  
564 Wastewater-Based Epidemiology (WBE) and Viral Detection in Polluted Surface Water: A Valuable Tool  
565 for COVID-19 Surveillance-A Brief Review. *Int J Environ Res Public Health.* 2020;17(24).
- 566 8. Hamouda M, Mustafa F, Maraqa M, Rizvi T, Aly Hassan A. Wastewater surveillance for SARS-  
567 CoV-2: Lessons learnt from recent studies to define future applications. *Sci Total Environ.*  
568 2021;759:143493.
- 569 9. Kayikcioglu T, Amirzadegan J, Rand H, Tesfaldet B, Timme RE, Pettengill JB. Performance of  
570 methods for SARS-CoV-2 variant detection and abundance estimation within mixed population samples.  
571 *PeerJ.* 2023;11:e14596.
- 572 10. Wang Y, Hu X, Yang L, Chen C, Cheng H, Hu H, et al. Application of High-Throughput Sequencing  
573 Technology in the Pathogen Identification of Diverse Infectious Diseases in Nephrology Departments.  
574 *Diagnostics (Basel).* 2022;12(9).
- 575 11. Suminda GGD, Bhandari S, Won Y, Goutam U, Kanth Pulicherla K, Son YO, et al. High-throughput  
576 sequencing technologies in the detection of livestock pathogens, diagnosis, and zoonotic surveillance.  
577 *Comput Struct Biotechnol J.* 2022;20:5378-92.
- 578 12. Ko KKK, Chng KR, Nagarajan N. Metagenomics-enabled microbial surveillance. *Nat Microbiol.*  
579 2022;7(4):486-96.
- 580 13. Iwu-Jaja C, Ndlovu NL, Rachida S, Yousif M, Taukobong S, Macheke M, et al. The role of  
581 wastewater-based epidemiology for SARS-CoV-2 in developing countries: Cumulative evidence from  
582 South Africa supports sentinel site surveillance to guide public health decision-making. *Sci Total Environ.*  
583 2023;903:165817.
- 584 14. GenomeTrakr-protocols-wastewater [Available from: [https://www.protocols.io/file-  
585 manager/682C9E830C0A11EC806D0A58A9FEAC02](https://www.protocols.io/file-manager/682C9E830C0A11EC806D0A58A9FEAC02)].
- 586 15. Freed NE, Vlkova M, Faisal MB, Silander OK. Rapid and inexpensive whole-genome sequencing  
587 of SARS-CoV-2 using 1200 bp tiled amplicons and Oxford Nanopore Rapid Barcoding. *Biol Methods  
588 Protoc.* 2020;5(1):bpaa014.
- 589 16. Swift BioSciences. "NEW- Swift Normalase™ Amplicon SARS-CoV-2 Panels." [Available from:  
590 <https://swiftbiosci.com/swift-normalase-amplicon-sars-cov-2-panels-3/>].
- 591 17. VarSkip Multiplex PCR Designs for SARS-CoV-2 Sequencing. 2021. Reprint, New England Biolabs  
592 Inc., 2021 [Available from: <https://github.com/nebiolabs/VarSkip>].
- 593 18. The Pango nomenclature is being used by researchers and public health agencies worldwide to  
594 track the transmission and spread of SARS-CoV-2, including variants of concern. [Available from:  
595 <https://cov-lineages.org/>].

- 596 19. Cui Y, Peng L, Hu Y, Lai HJ. Assessing the Reproducibility of Microbiome Measurements Based on  
597 Concordance Correlation Coefficients. *J R Stat Soc Ser C Appl Stat.* 2021;70(4):1027-48.
- 598 20. Palarea-Albaladejo J M-FJ. zCompositions- R package for multivariate imputation of left-  
599 censored data under a compositional approach. *Chemometrics and Intelligent Laboratory Systems.*  
600 2015;143:85-96.
- 601 21. Timme RE, Woods J, Jones JL, Calci KR, Rodriguez R, Barnes C, et al. SARS-CoV-2 wastewater  
602 variant surveillance: pandemic response leveraging FDA's GenomeTrakr network. *medRxiv.*  
603 2024:2024.01.10.24301101.
- 604 22. Bivins A, Kaya D, Bibby K, Simpson SL, Bustin SA, Shanks OC, et al. Variability in RT-qPCR assay  
605 parameters indicates unreliable SARS-CoV-2 RNA quantification for wastewater surveillance. *Water Res.*  
606 2021;203:117516.
- 607 23. Ramesh S, Govindarajulu M, Parise RS, Neel L, Shankar T, Patel S, et al. Emerging SARS-CoV-2  
608 Variants: A Review of Its Mutations, Its Implications and Vaccine Efficacy. *Vaccines (Basel).* 2021;9(10).
- 609 24. Iwamoto R, Yamaguchi K, Katayama K, Ando H, Setsukinai KI, Kobayashi H, et al. Identification of  
610 SARS-CoV-2 variants in wastewater using targeted amplicon sequencing during a low COVID-19  
611 prevalence period in Japan. *Sci Total Environ.* 2023;887:163706.
- 612 25. ARTIC primer revamping [Available from: <https://community.artic.network/c/laboratory/6>.
- 613 26. Tyson JR, James P, Stoddart D, Sparks N, Wickenhagen A, Hall G, et al. Improvements to the  
614 ARTIC multiplex PCR method for SARS-CoV-2 genome sequencing using nanopore. *bioRxiv.* 2020.
- 615 27. Paola Cristina Resende FCM, Sunando Roy, Luciana Appolinario, Allison Fabri, Joilson Xavier,  
616 Kathryn Harris, Aline Rocha Matos, Braulia Caetano, Maria Orgeswalska, Milene Miranda, Cristiana  
617 Garcia, André Abreu, Rachel Williams, Judith Breuer, Marilda M Siqueira. SARS-CoV-2 Genomes  
618 Recovered by Long Amplicon Tiling Multiplex Approach Using Nanopore Sequencing and Applicable to  
619 Other Sequencing Platform. *BioRxiv.* 2020.

620

## 621 **Acknowledgements**

622 We gratefully acknowledge the wastewater treatment plant for collecting samples for this study and  
623 sharing it with us. We acknowledge Dr. Leena Malayil and Dr. Amy Sapkota, School of Public Health,  
624 University of Maryland for introducing us to the WWTP for sample collection. We acknowledge  
625 CovidTrakr working groups at the Center for Food Safety and Applied Nutrition (CFSAN) for discussion  
626 that facilitated this manuscript. We also acknowledge the support of CFSAN high performance  
627 computing engineers G. Engelbach, J. Payne, K. Konganti, and M. Hammond. We acknowledge all data  
628 contributors for generating the genetic sequence and metadata and sharing via the GISAID Initiative, on  
629 which this research is partly based.

630

631 **Author Contributions**

632 PR performed sample collection, lab experiments, data interpretations and wrote and edited the  
633 manuscript. TK developed C-WAP and performed data analysis and interpretation. PR, AW, CG and MH  
634 conceived and designed the study and performed laboratory experiments. KJ performed lab  
635 experiments and data interpretation. CB, TP, MB, ST and RT developed the dashboard. EB retrieved  
636 samples from WWTP. BT performed concordant correlation coefficient analysis. JA, DE, JP and HR  
637 performed data analysis. All authors reviewed and edited the manuscript and approved the final  
638 version.

639 **Funding**

640 This project was supported in part by funding from the American Rescue Plan Act of 2021. Jasmine  
641 Amirzadegan, Candace Hope Bias, Kathryn Judy, and Tammy Walsky's participation was supported by an  
642 appointment to the Research Participation Program at the U.S. Food and Drug Administration  
643 administered by the Oak Ridge Institute for Science and Education through an interagency agreement  
644 between the U.S. Department of Energy and the U.S. Food and Drug Administration. Tunc Kayikcioglu  
645 and Dietrich EppSchmidt received financial support from Joint Institute for Food Safety and Applied  
646 Nutrition (JIFSAN), University of Maryland as part of financial assistance award U01FD001418 funded by  
647 the Food and Drug Administration (FDA) of the U.S. Department of Health and Human Services (HHS).  
648 The funders had no role in study design, data collection and analysis, decision to publish, or preparation  
649 of the manuscript.

650

651 Table 1: QC metrics monitored for data submission and further analysis.

652 Schematic Fig1 : Weekly collection and processing of composite samples: From February 23rd through

653 June 30, 2022, daily composite samples were pooled into a single sample of two biological replicates per

654 week. Each biological replicate was then split into three 40mL technical replicates, resulting in six  
655 samples per week that was taken into further processing.

656 Figure 1: Flowchart of wastewater processing and analysis workflow: Wastewater samples collected  
657 from the treatment plant were pooled by week and the total nucleic acid (TNA) was extracted using  
658 Promega Enviro TNA kit. Genomic DNA was digested with ezDNase prior to cDNA synthesis using  
659 Superscript IV Reverse Transcriptase. The cDNA was amplified using either NEBNext VarSkip Short (VSS)  
660 primers for long-read (~550bp) sequencing on the Oxford Nanopore Technologies GridION or QIAseq  
661 DIRECT (QIAseq) primers for short-read (~250bp) sequencing on the Illumina MiSeq. All sequences were  
662 processed through the CFSAN Wastewater Analysis Pipeline, producing a report that included QC  
663 metrics as well as relative abundance of variants. Sequences that pass QC are submitted to NCBI and the  
664 variant calls were published in the FDA dashboard.

665 Figure 2: SARS-CoV-2 viral load and relationship to clinical cases: The relationship of wastewater-based  
666 surveillance burden estimations and actual clinical reporting, with clinical data plotted against the viral  
667 genome copies/L, over time. The rolling 7-day average of new clinical SARS-CoV-2 cases (black) in the  
668 sewer shed graphed alongside the viral load over time (blue), calculated from RT-qPCR on raw  
669 wastewater and 24h composite samples taken from the wastewater treatment plant. Number of cases is  
670 indicated on the right-hand axis, while genome copies/L is marked on the left.

671 Figure 3: Percentage of aligned reads vs. wastewater viral load : Weekly average percent reads aligned  
672 to the SC2 genome (black) and the weekly average SC2 viral load (gc/L) detected by RT-qPCR from  
673 wastewater (orange). Sequencing runs/data from both enrichment panels (NEB VSS and QIAseq DIRECT,  
674 n=364) included in the averaging to calculate the weekly percent reads aligned were quality filtered to <  
675 20% sites with 0x coverage and < 40% sites covered <10x after alignment.

676 Figure 4: Coverage depth vs coverage breadth: Sequencing depth versus breadth of the SARS-CoV-2  
677 genome covered for each amplicon kit and every month of wastewater surveillance. Any point along a  
678 given line indicates the percentage (breadth, y-axis) of the SARS-CoV-2 genome covered to the  
679 corresponding sequence depth (x-axis) for that single sample. The green bar on the first panel of January  
680 2022, shows an ideal sequencing run with maximum depth covering the entire genome. Each line  
681 indicates one sequenced sample that resulted in <20% sites along the genome covered 0x and <40%  
682 sites covered <10x after alignment.

683 Figure 5: Genome coverage across ORF1ab, S, M, and N genes of SC2 genome: Genome coverage by  
684 amplicon kit for key genes used to detect SARS-CoV-2 variants from January through June 2022. The  
685 averaged number of under-covered (fewer than 10 quality-filtered and trimmed reads aligned) for each  
686 gene and amplicon kit over time is indicated in red, with worse coverage (poorer sequencing  
687 performance) in lighter colors.

688 Figure 6: Concordant Correlation Coefficient (CCC) analysis: concordant correlation coefficient analysis  
689 on the variant calling performance of Freyja and kallisto on eleven samples between May and June 2022  
690 sequenced with both NEB VarSkip Short and QIAseq DIRECT primers. A CCC of +1 indicates perfect  
691 agreement, -1 indicates perfect disagreement, and 0 indicates no agreement.

692 Figure 7: Proportional abundance of SARS-CoV-2 variants detected over time: Proportional abundance  
693 of SARS-CoV-2 variants detected over time, as identified by the Freyja variant caller on sequence data  
694 from both the enrichment panels (NEB VSS and QIAseq DIRECT, n=364). Variants always detected in a  
695 proportion of less than 1% were grouped together as "Others <1%".

696 Figure 8: Verification of the BA.2 variant detection in wastewater on January 29<sup>th</sup>, 2022, using both the  
697 enrichment panel (NEB VSS and QIAseq DIRECT): 8A. Proportional abundance of SARS-CoV-2 variants by  
698 day, January 27<sup>th</sup> – February 1<sup>st</sup> 2022. 8b. Frequency of BA.1 and BA.2 –characteristic mutations over

699 four dates. Mutations typically incompatible with BA.1 (teal), characteristic for BA.1 or BA.2 (purple),  
700 and diagnostic for BA.2 (green, in a highlighted box) are shown at their location in the SARS-CoV-2  
701 genome. All depicted mutations are significant ( $p$ -value  $< 0.05$ ), but smaller circles indicate lower  $p$ -  
702 values. BA.2 was detected in the bottom three date panels.

703 Supplementary table1: Sample collection and pooling strategies employed in this study.

704 Supplementary table 2: Characteristic mutation table by C-WAP.

705 Supplementary table 3:Rolling 7 day average of new cases for zip codes monitored in this study along  
706 with the wastewater viral load (gc/L).

707 Supplementary Figure 1: SC2 population trend by sampling date using both the enrichment panel and  
708 Freyja as the variant caller.

709 Supplementary reports: Example reports of the comprehensive analysis produced by C-WAP.

Extraction

cDNA synthesis  
and amplification

Sequencing and  
data processing

Variant abundance  
estimation

Dashboard display

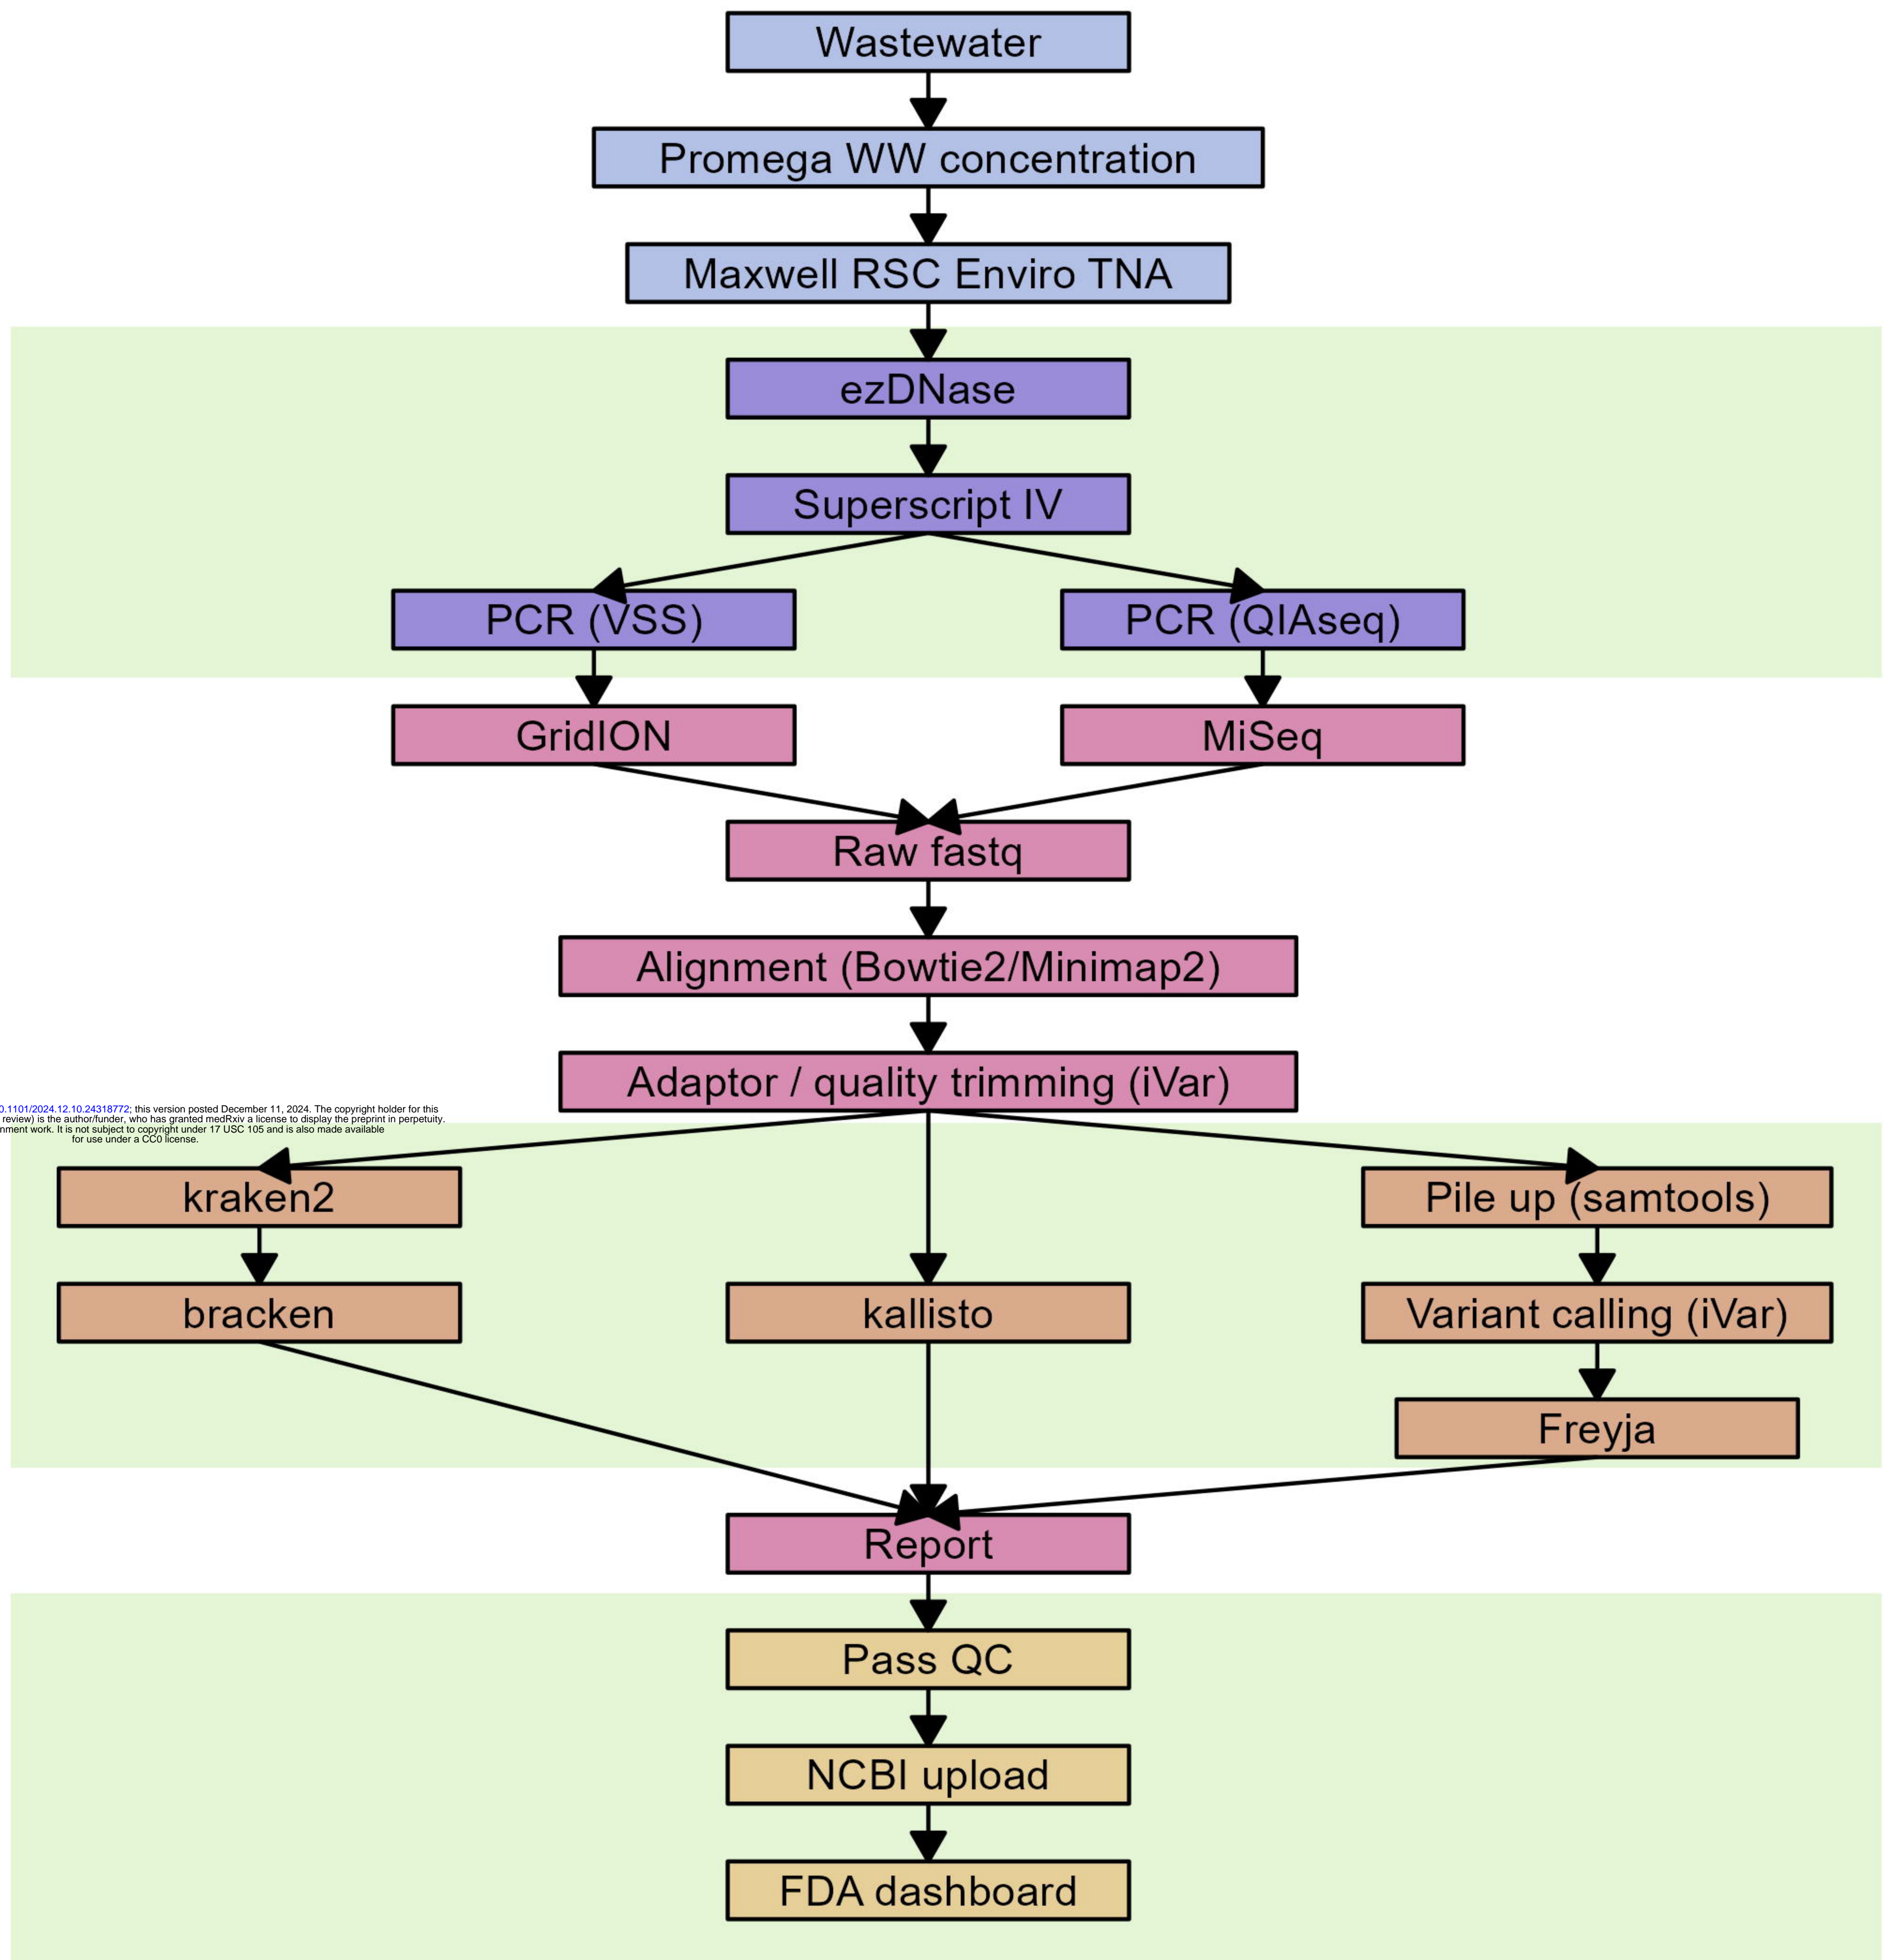

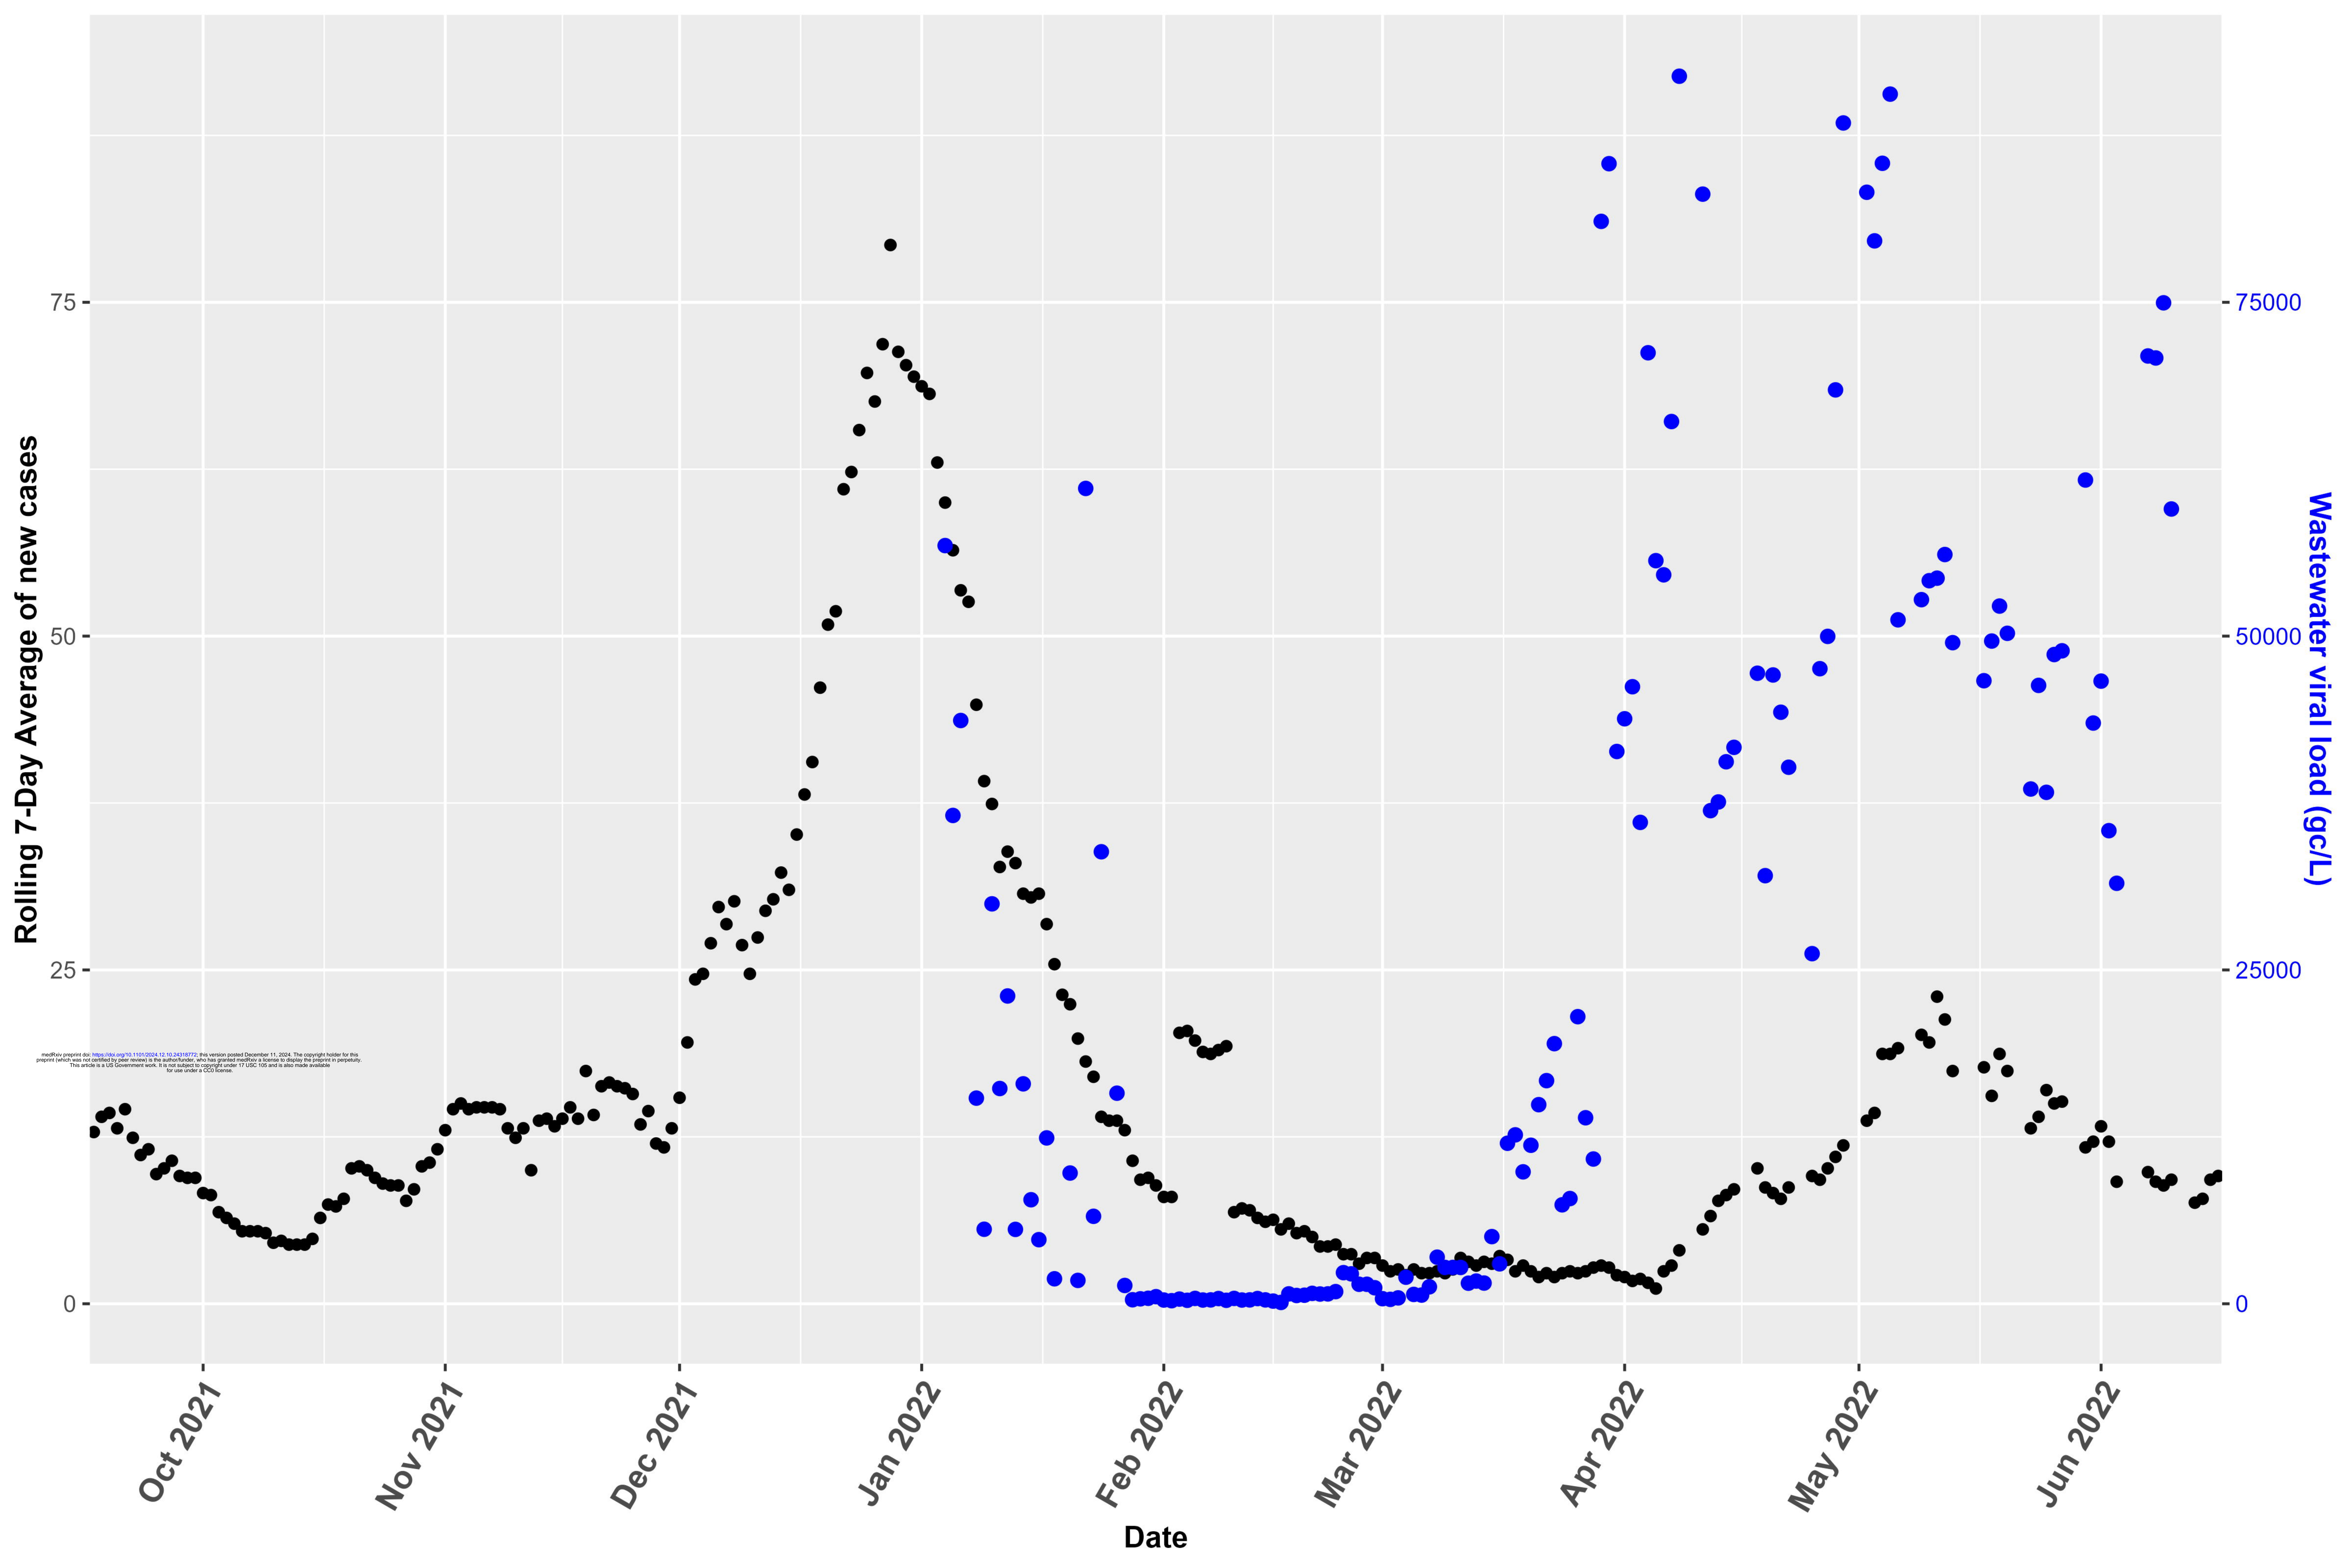



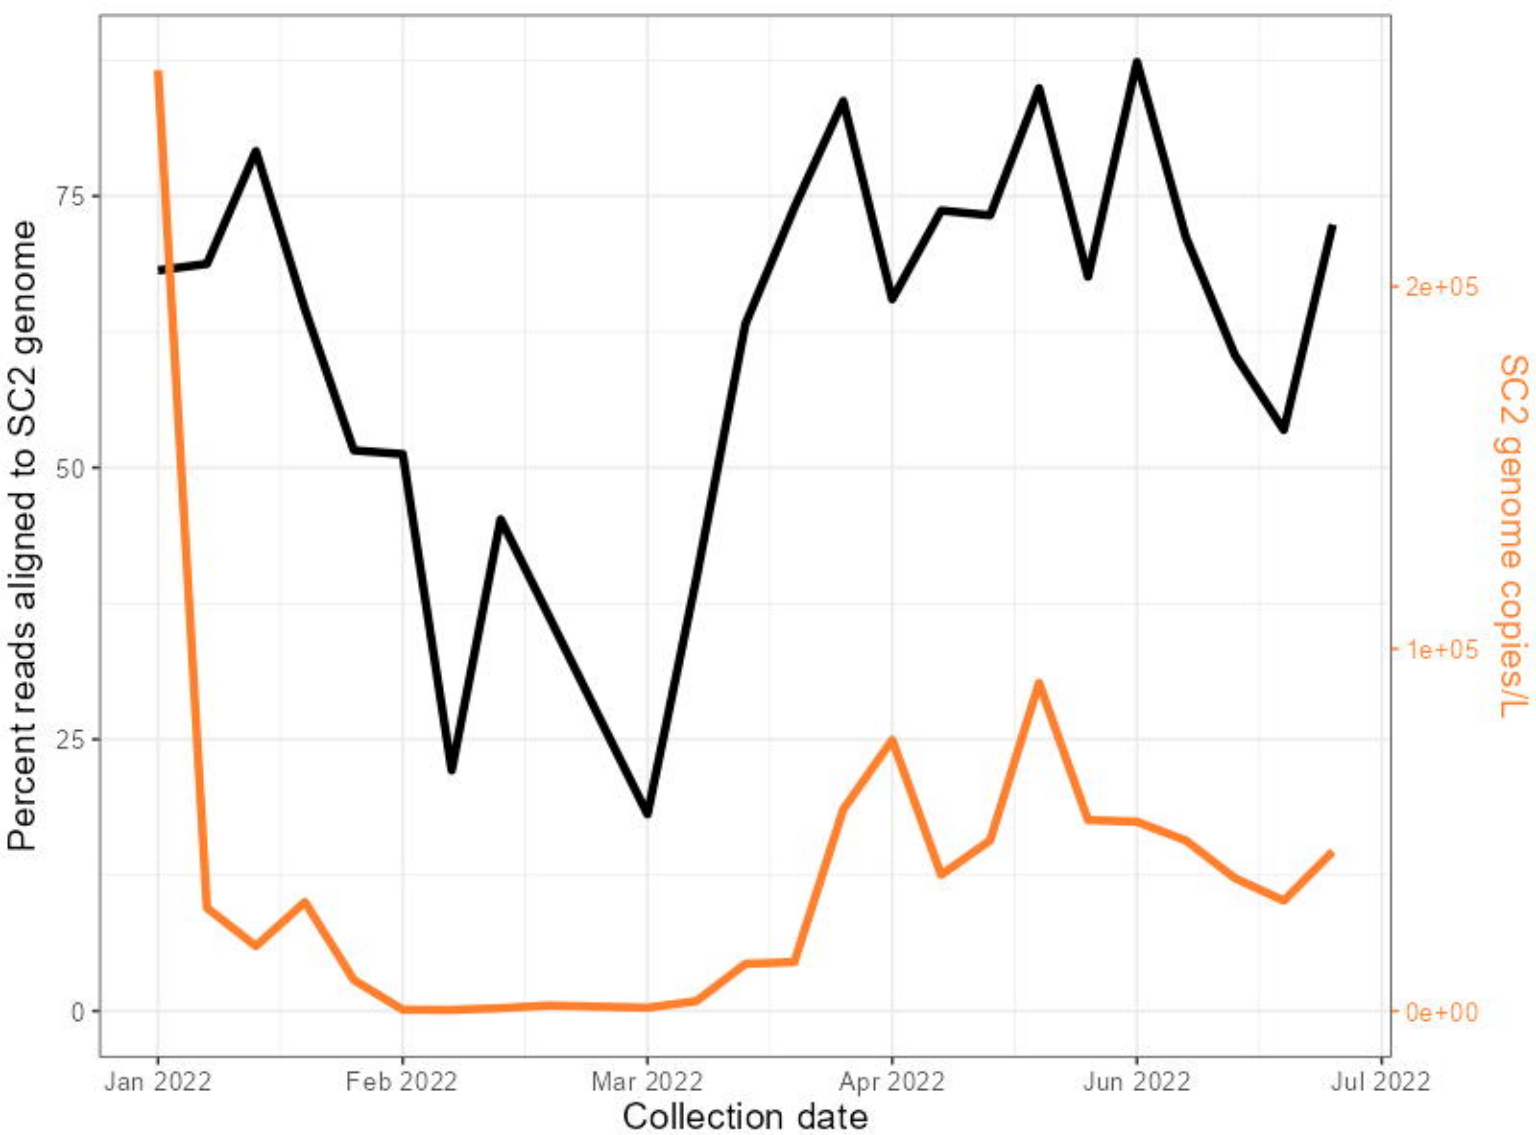

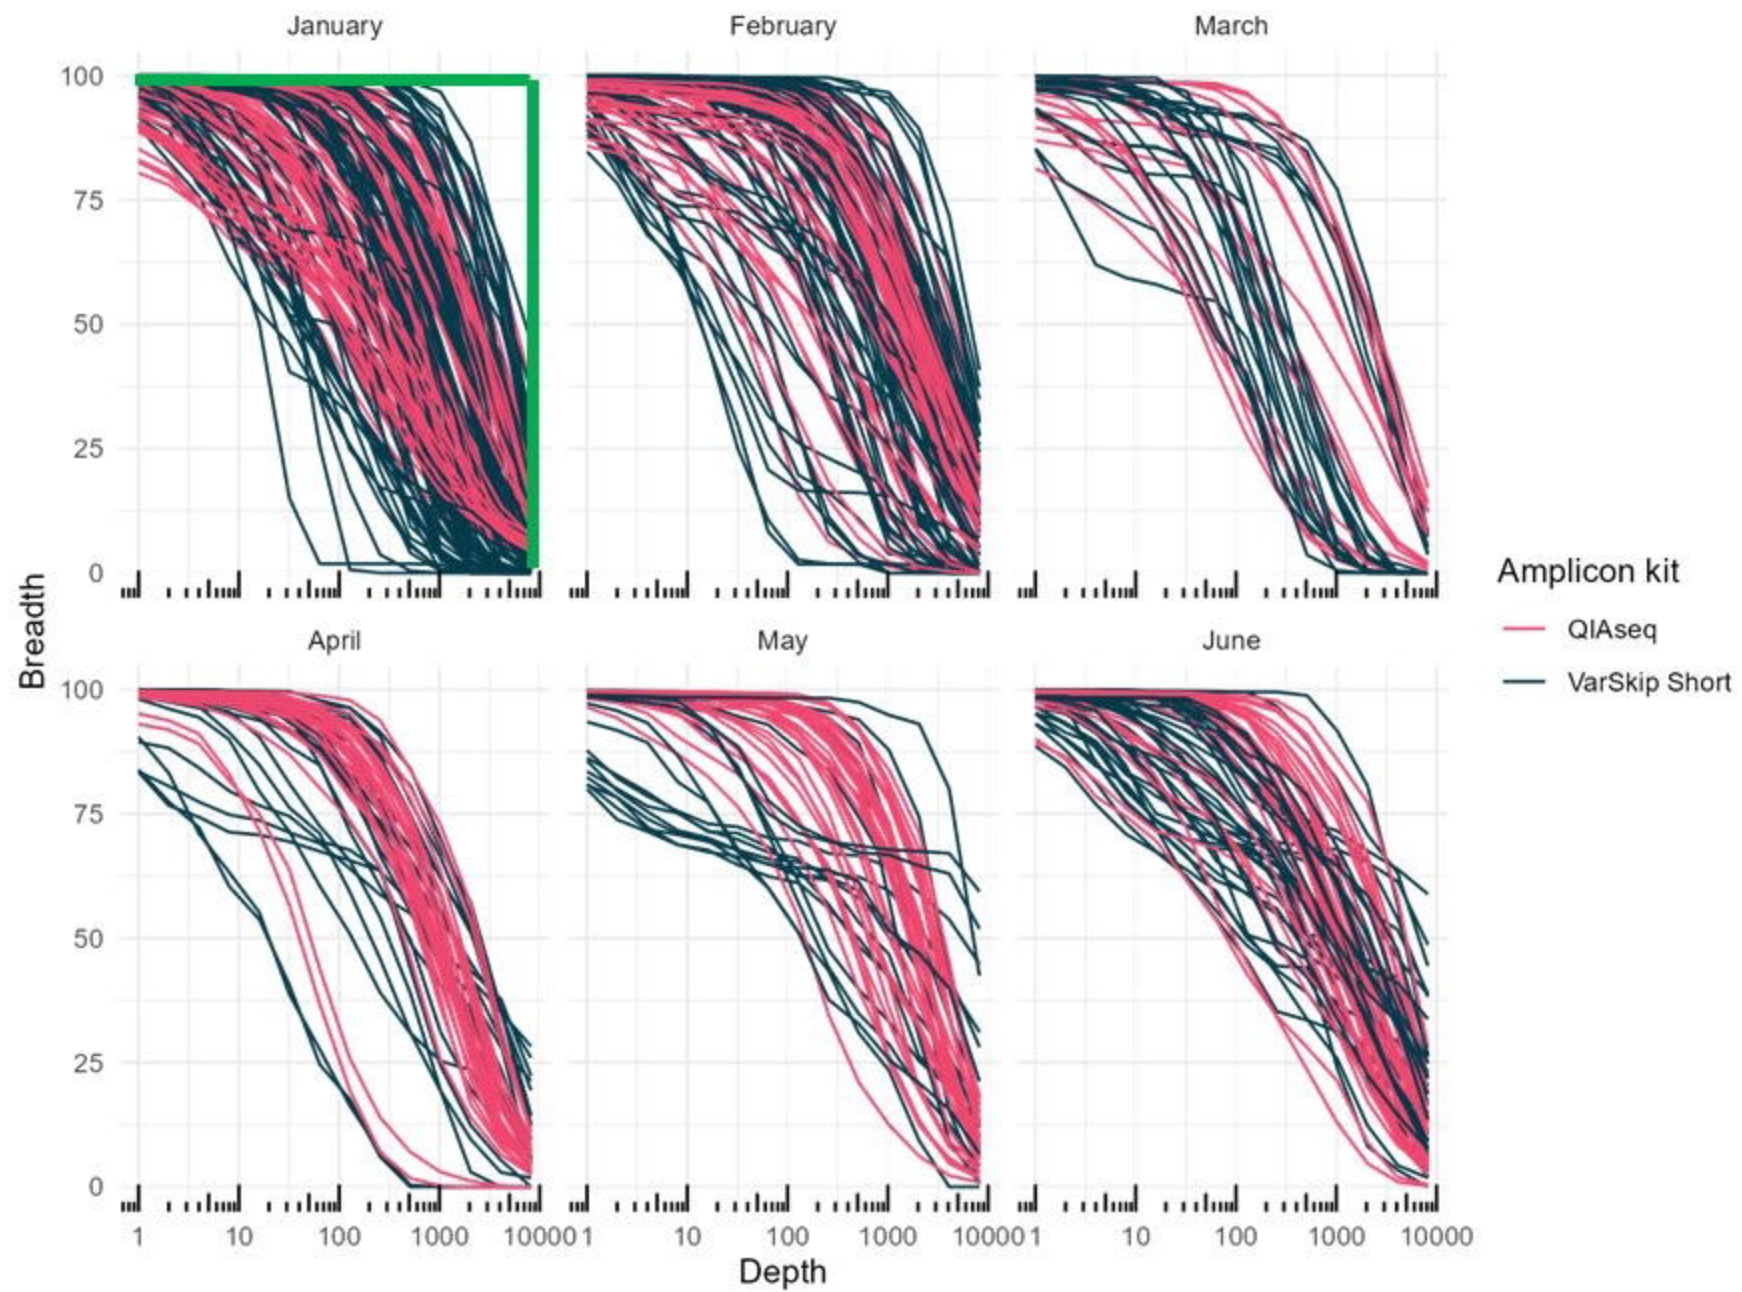

Average poorly covered sites, scaled by gene length

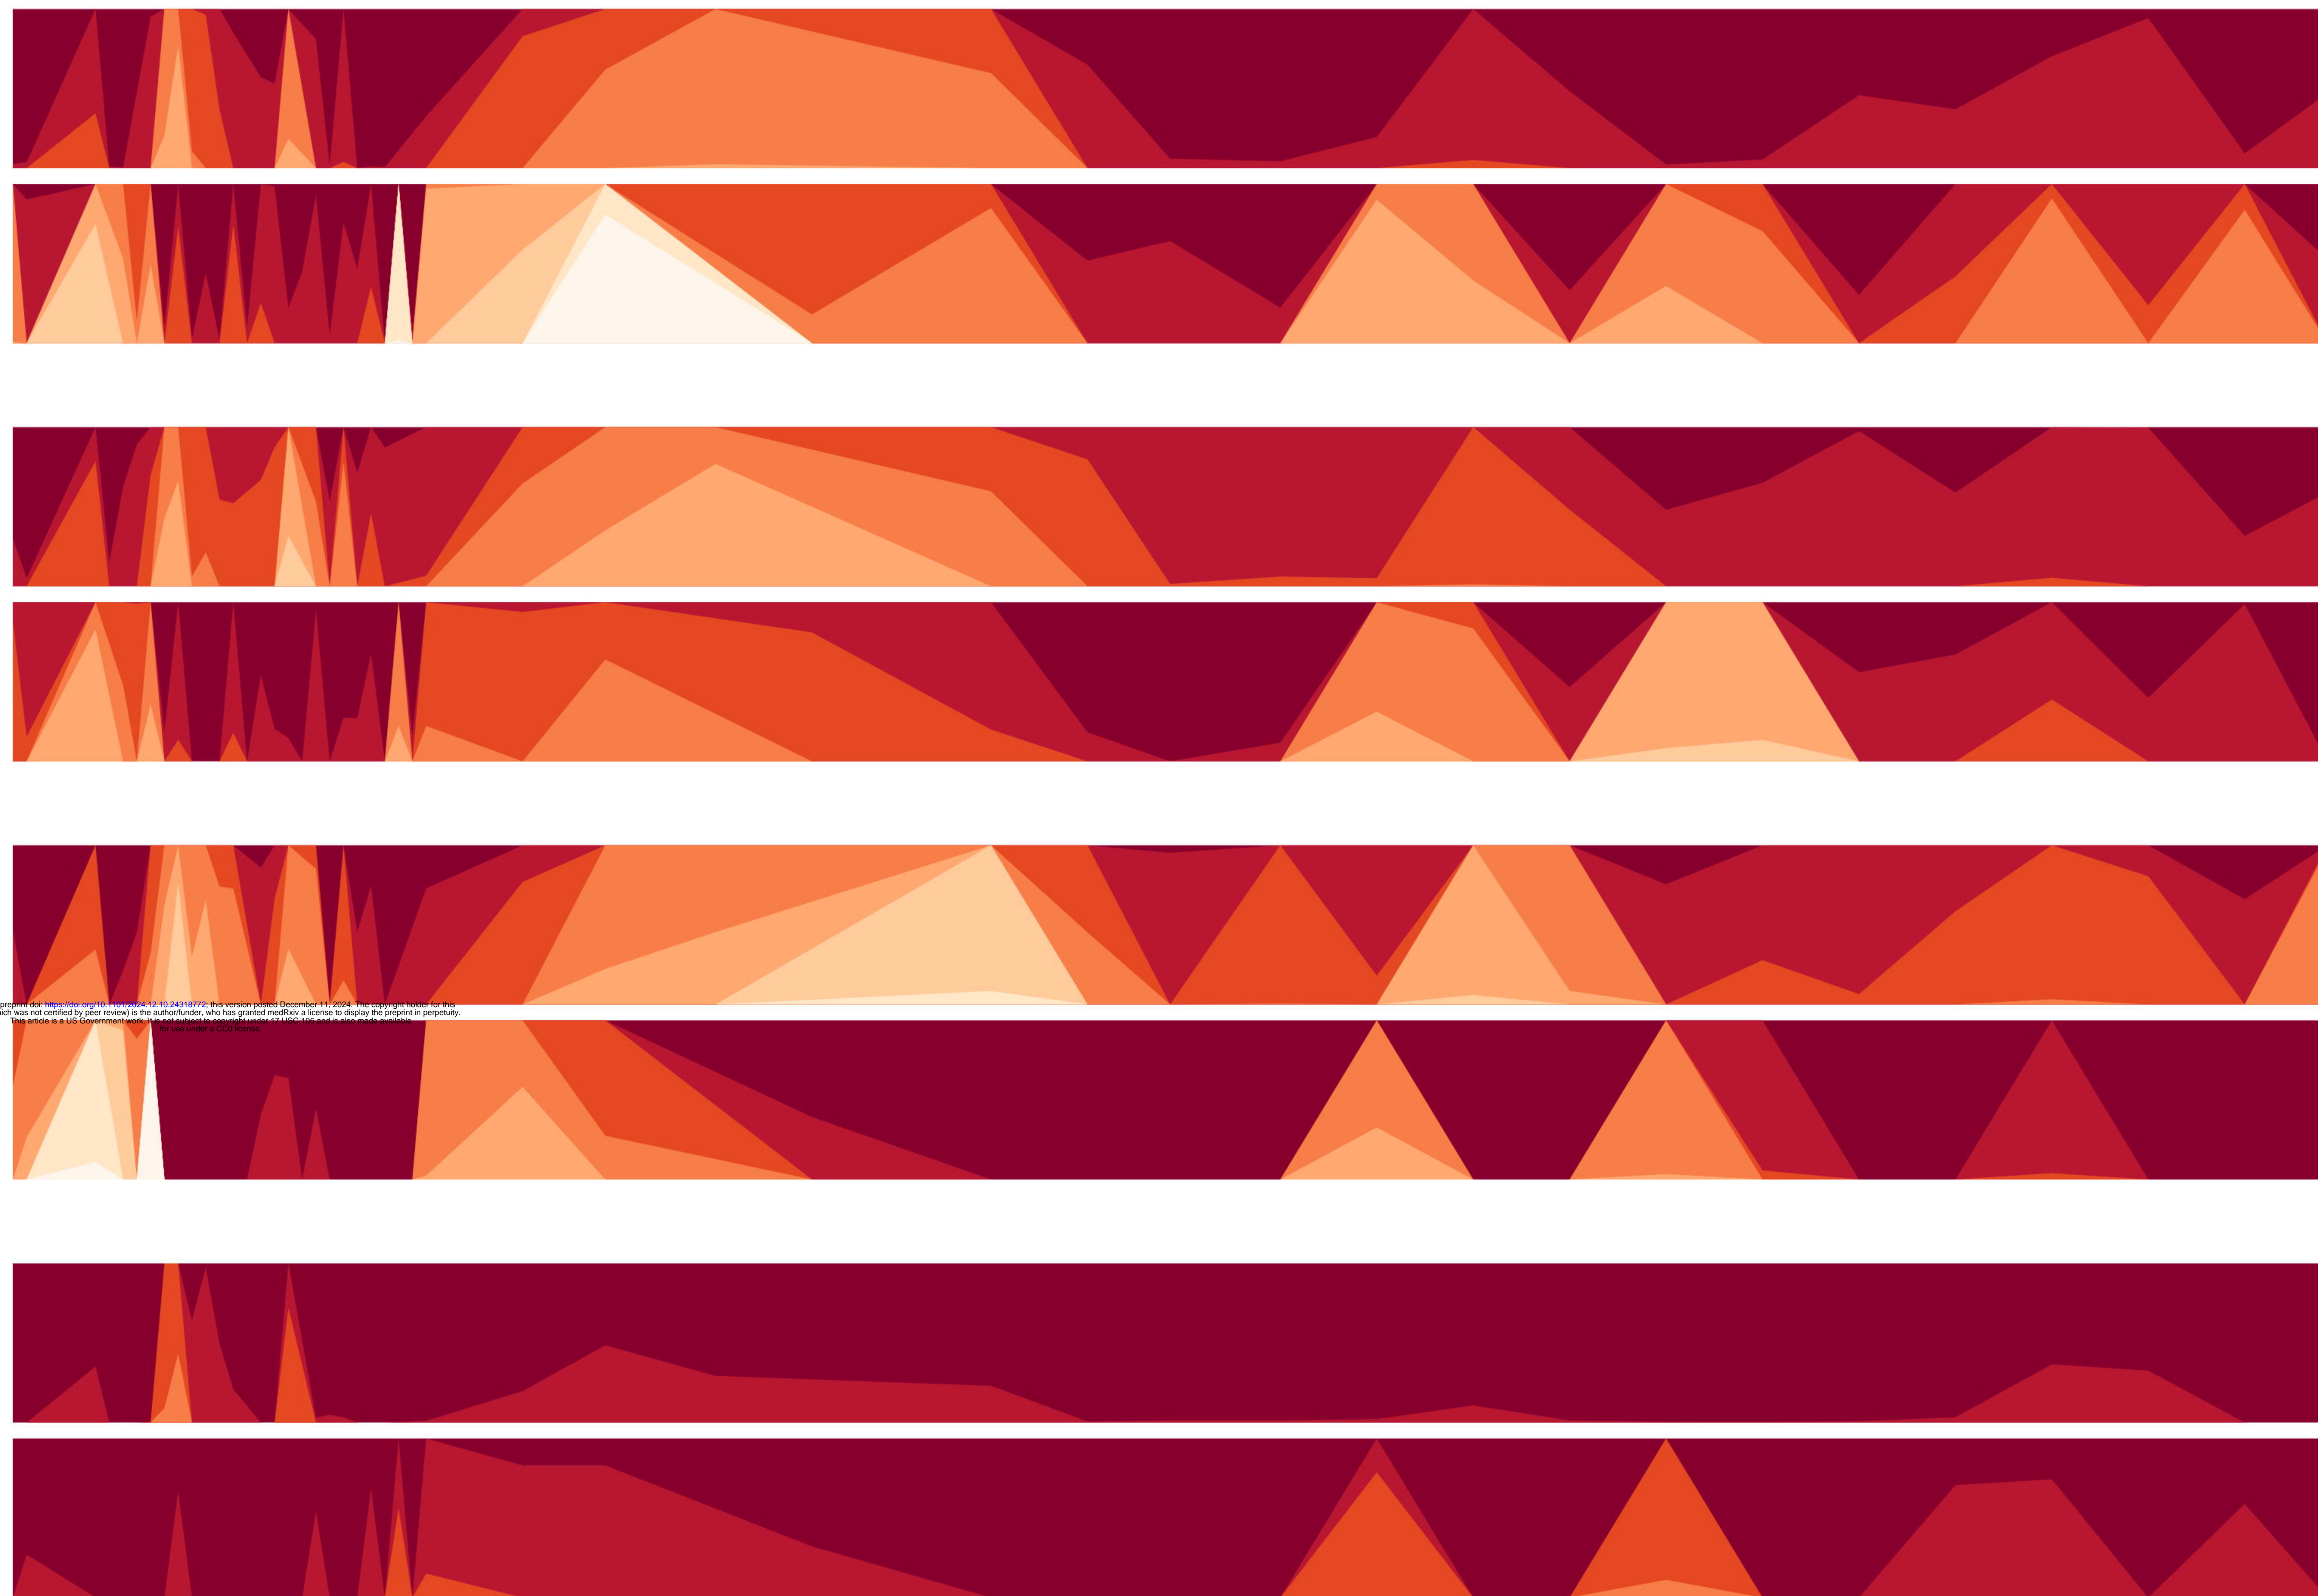

QIAseq  
VarSkip Short  
QIAseq  
VarSkip Short  
QIAseq  
VarSkip Short  
QIAseq  
VarSkip Short

ORF1ab  
S  
M  
N

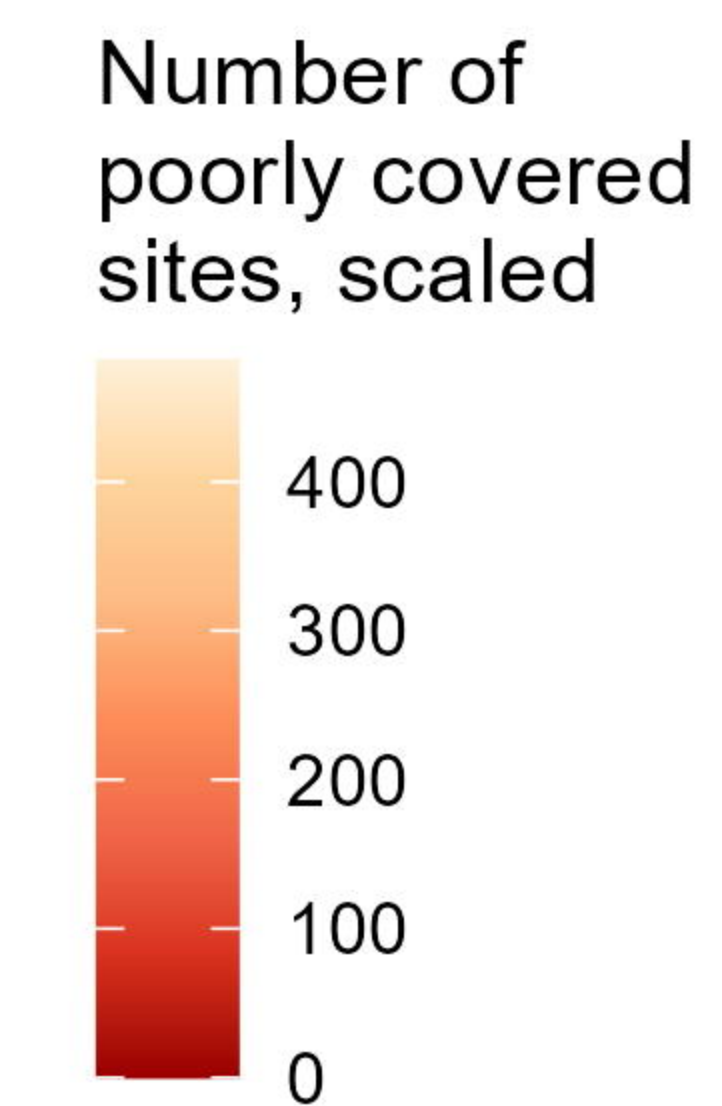

Feb '22  
Mar '22  
Apr '22  
May '22  
Jun '22

Sampled months

medRxiv preprint doi: <https://doi.org/10.1101/2021.10.24.21107702>; this version posted December 11, 2022. The copyright holder for this preprint (which was not certified by peer review) is the author/funder, who has granted medRxiv a license to display the preprint in perpetuity. It is made available under a CC-BY 4.0 International license.

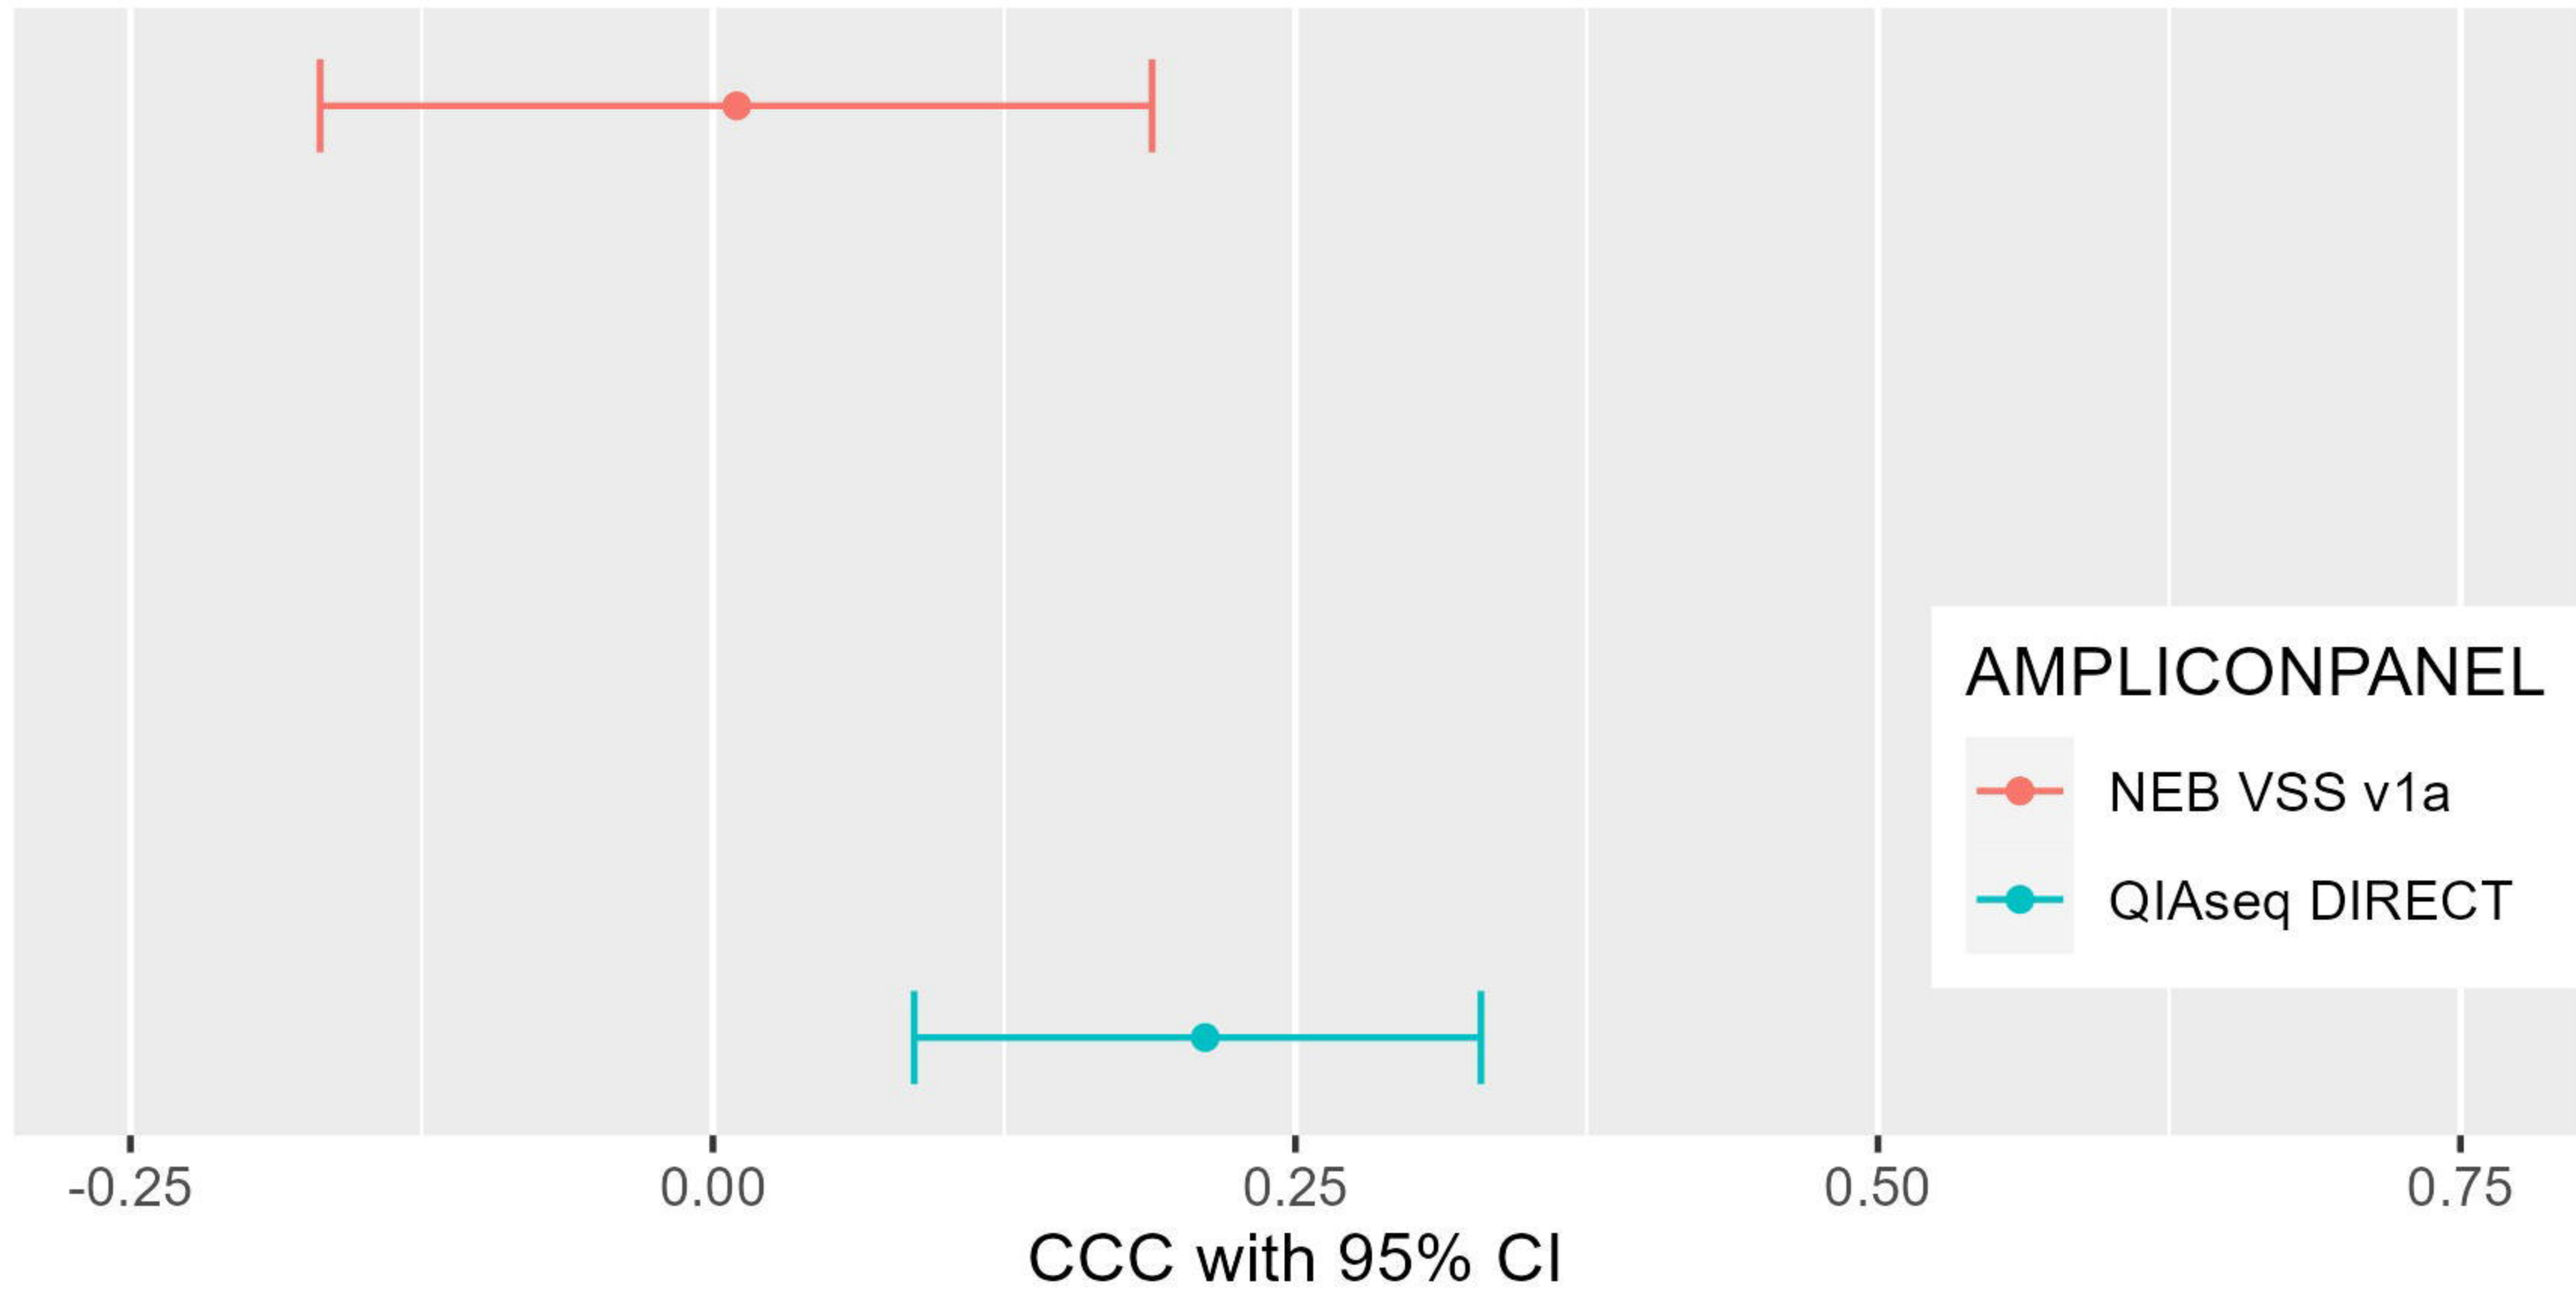

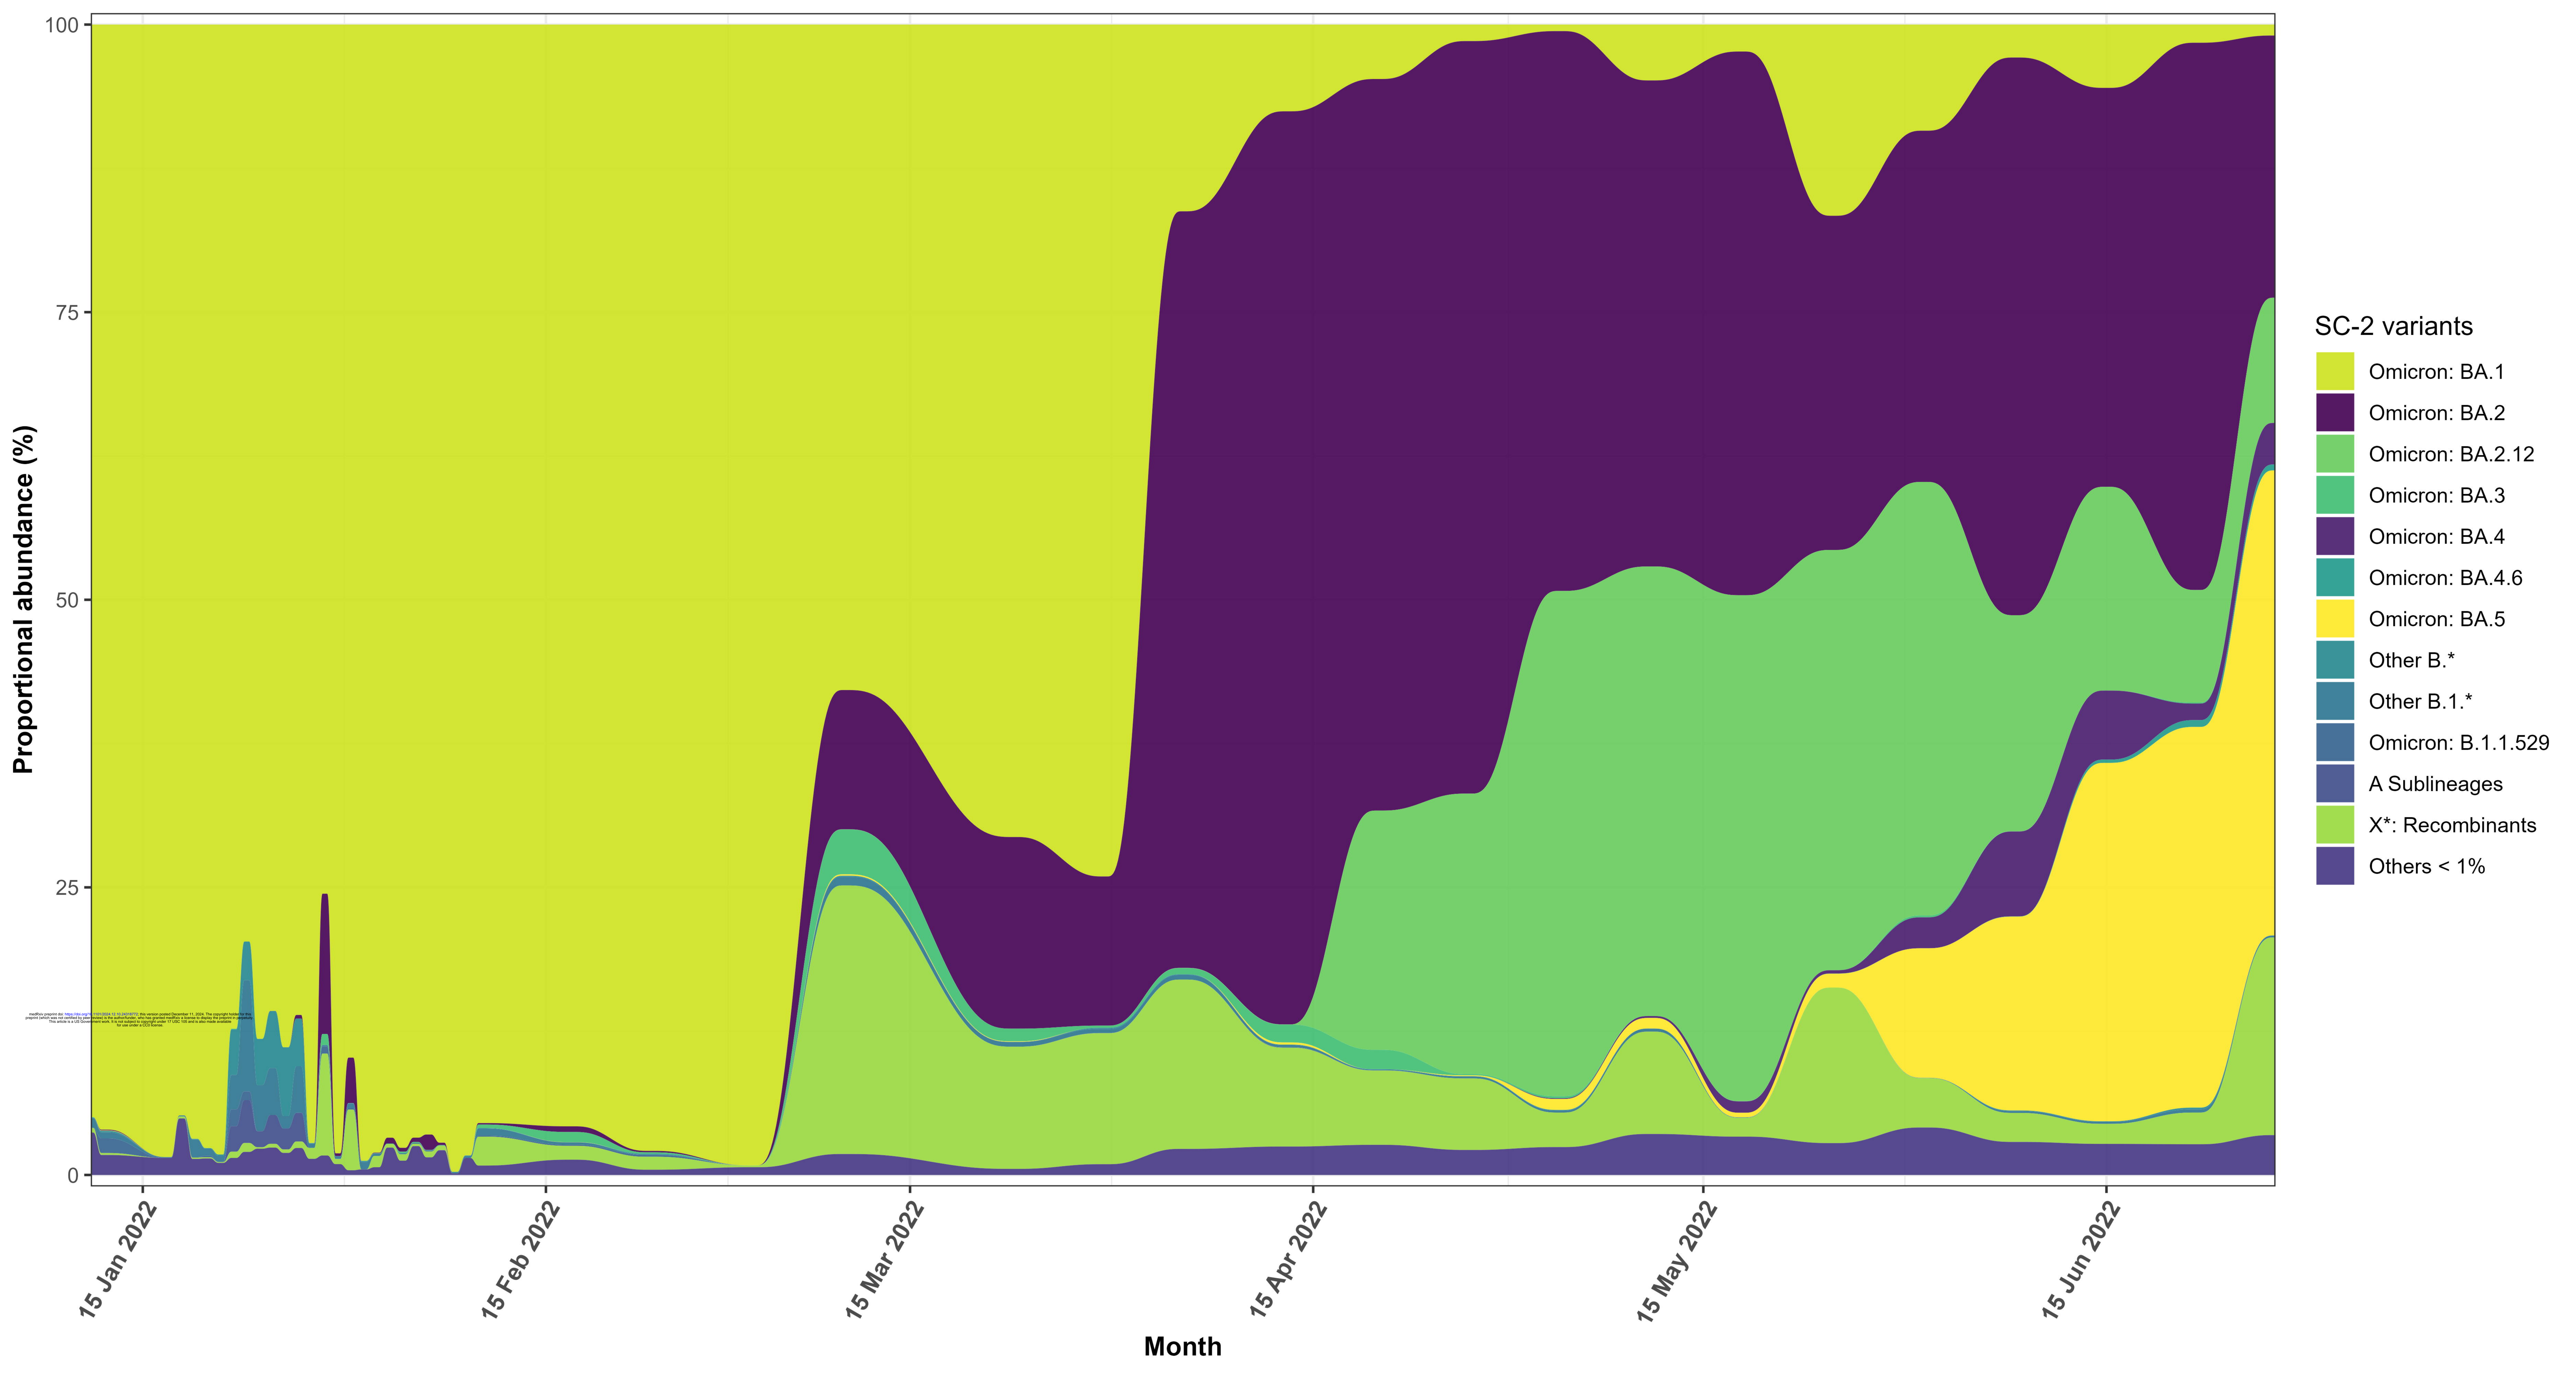



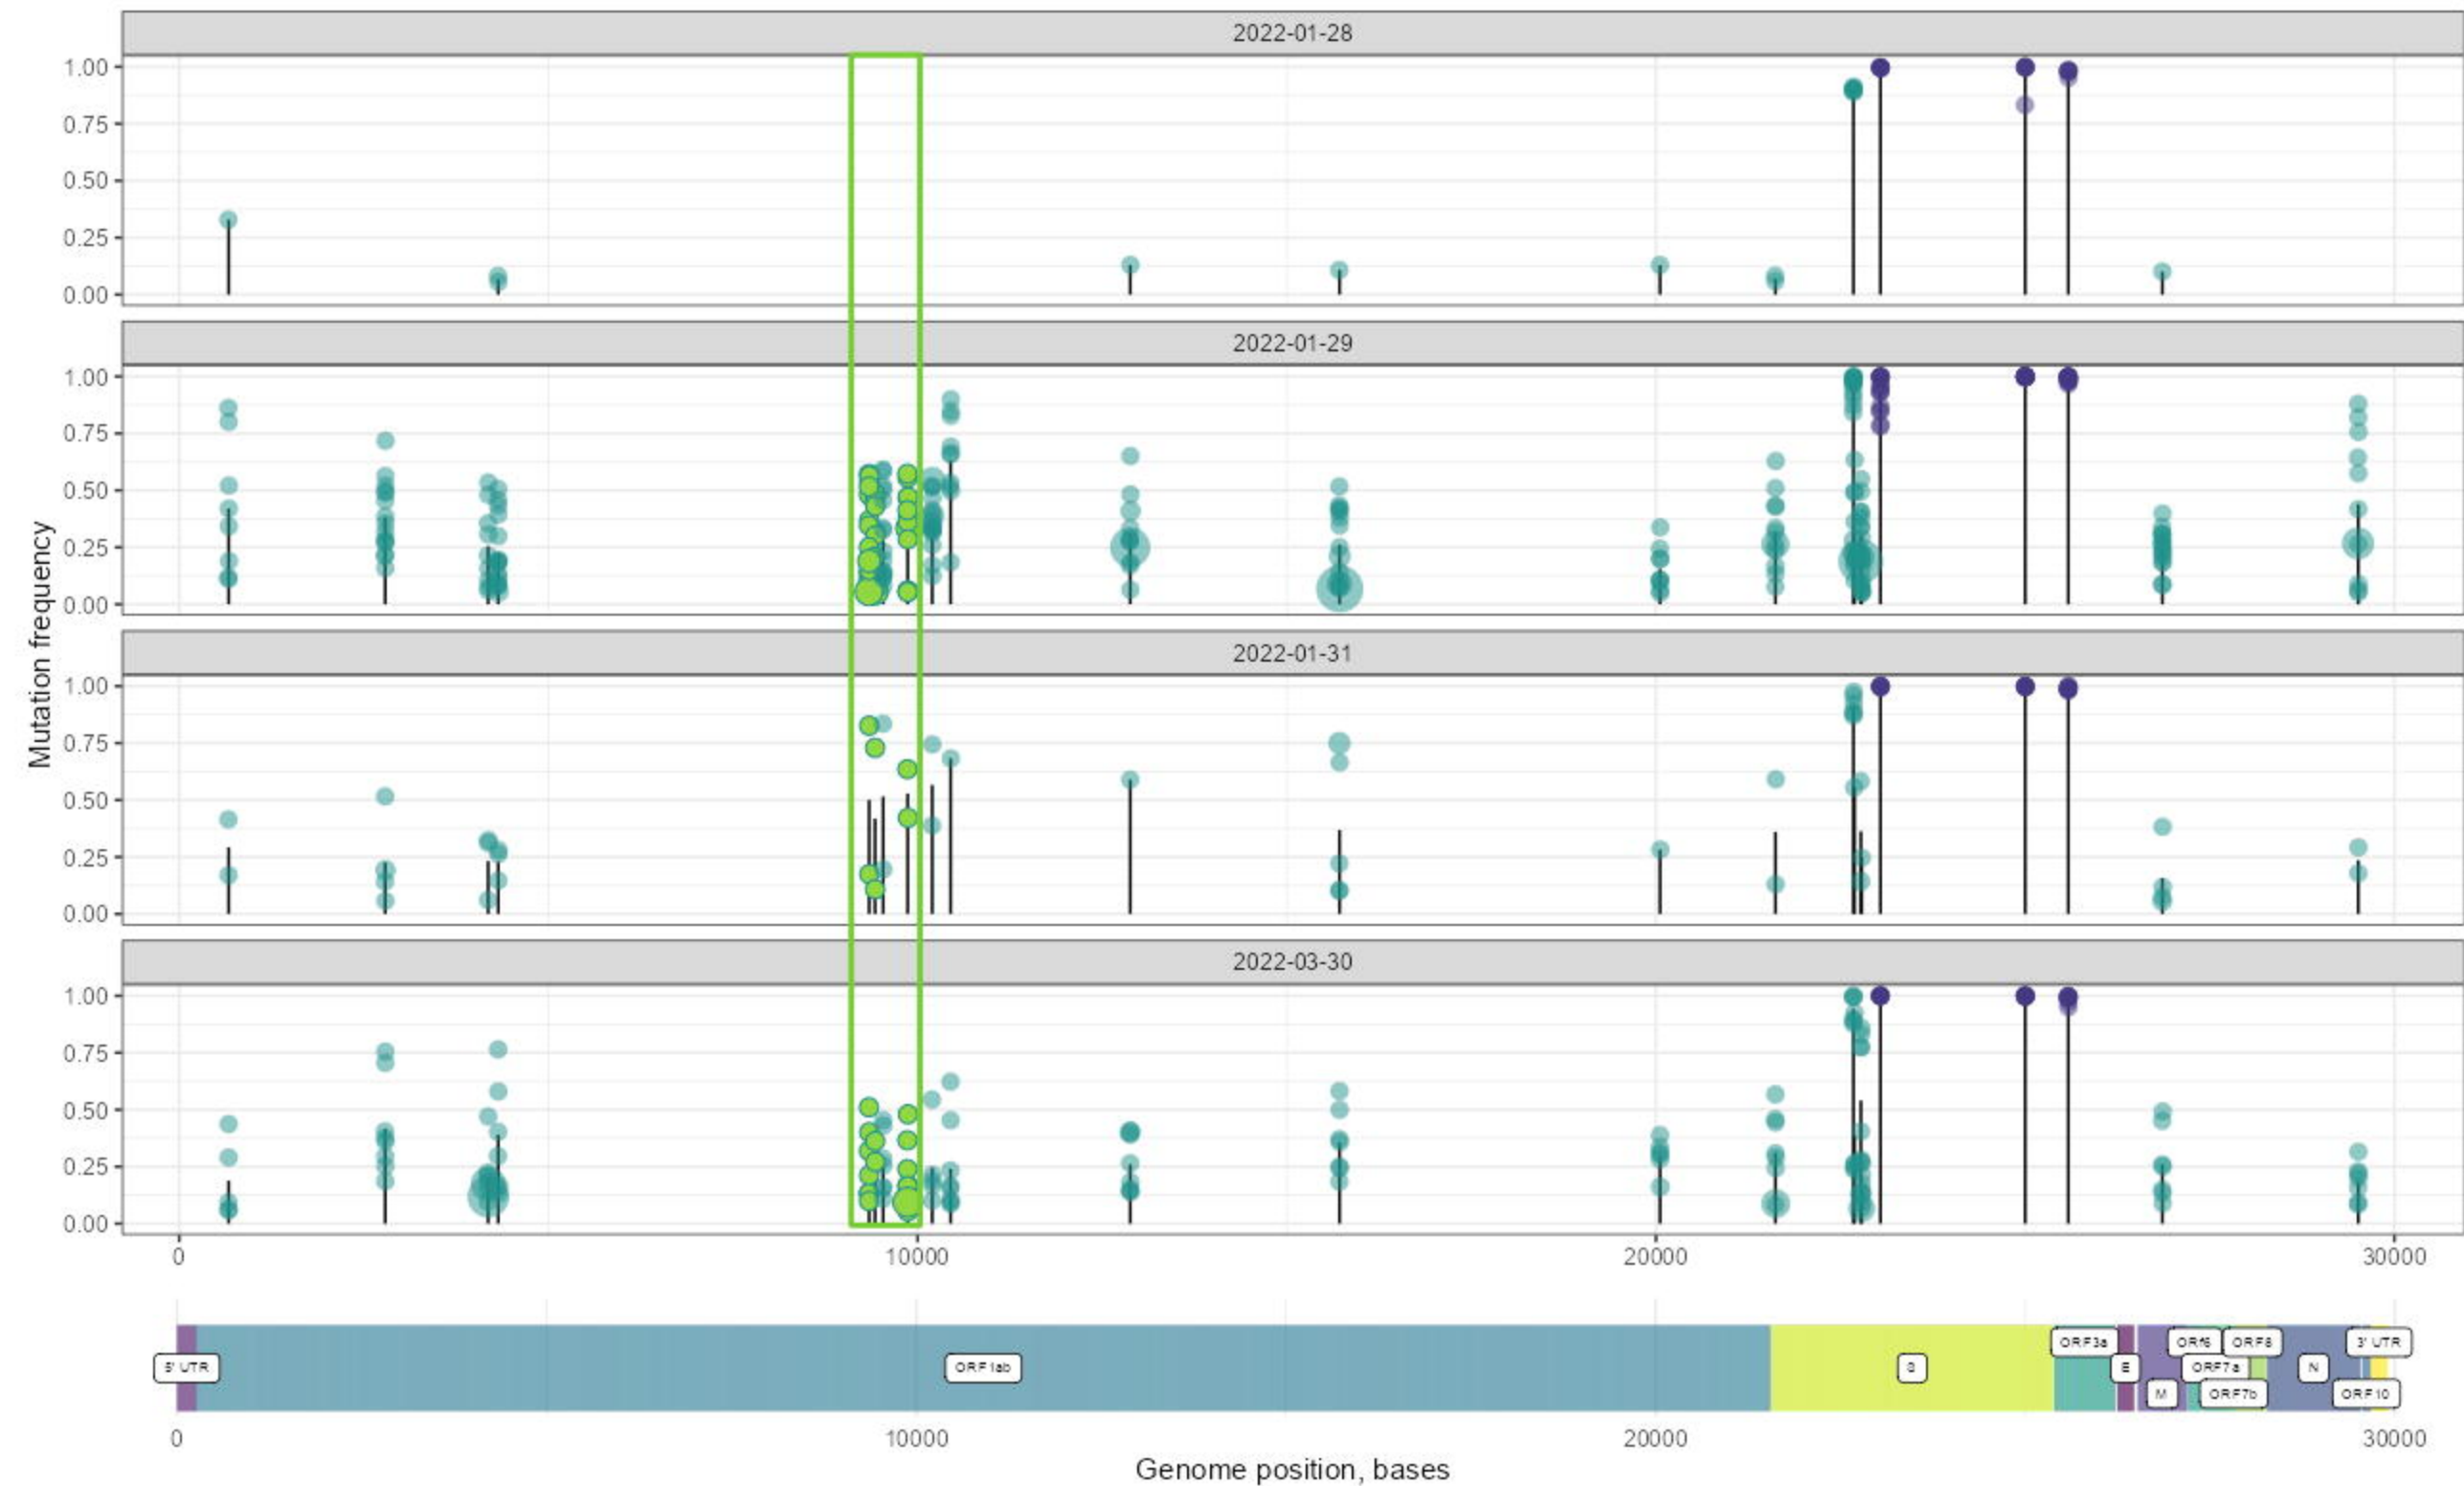

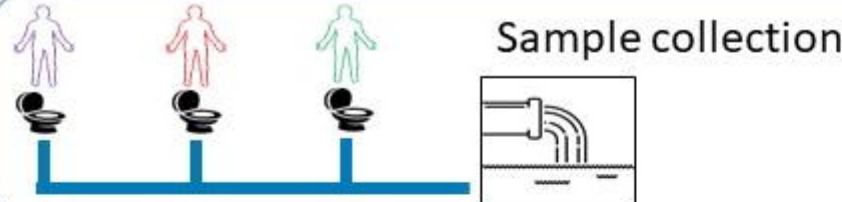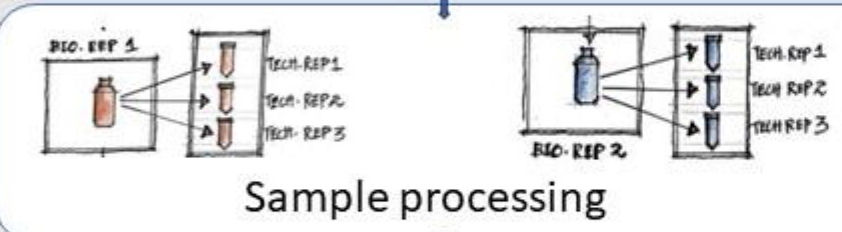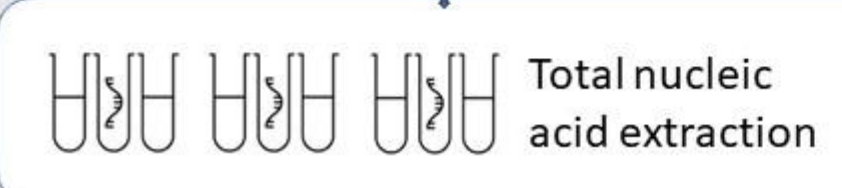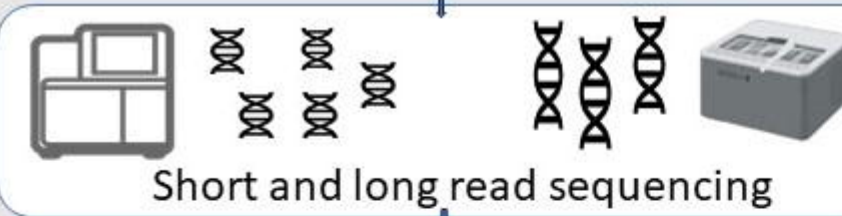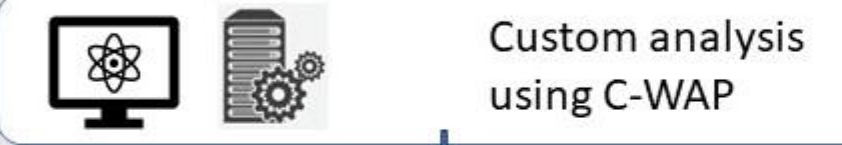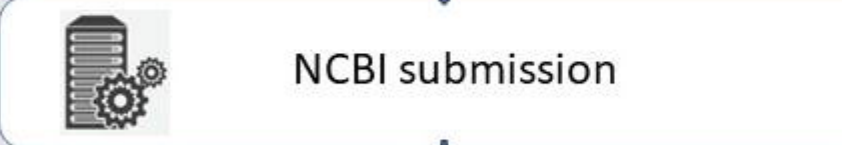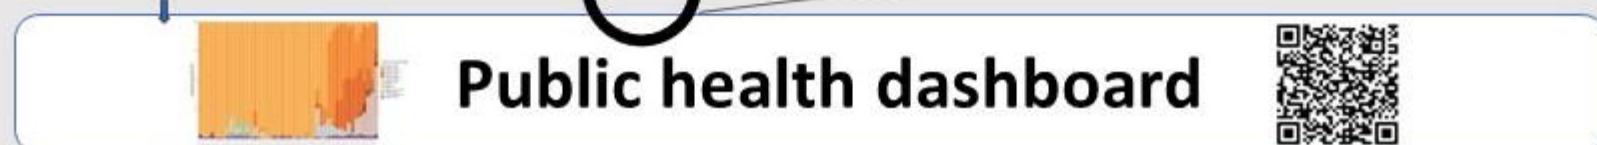

### Variant detection

### Mutation detection

| Mutation name | Compatible lineages    |
|---------------|------------------------|
| NUC_C241T     | B.1.427                |
| DEL_372_1     | None found             |
| ORF1AB_S135R  | BA.2, BA.3, BA.4, BA.5 |
| NUC_C835T     | B.1.617.3              |
| DEL_1001.1    | None found             |
| ORF1AB_T842I  | BA.2, BA.4, BA.5       |

### Sequencing Quality metrics

SARS-CoV-2 reads per sample (%Covid hits)

How deeply did we sequence the SARS-CoV-2 genome?

How evenly did we cover the genome?

52 hrs

76 hrs



WEEKLY COLLECTION & PROCESSING OF COMPOSITES  
FEB 23, 2022 - JUNE 28, 2022

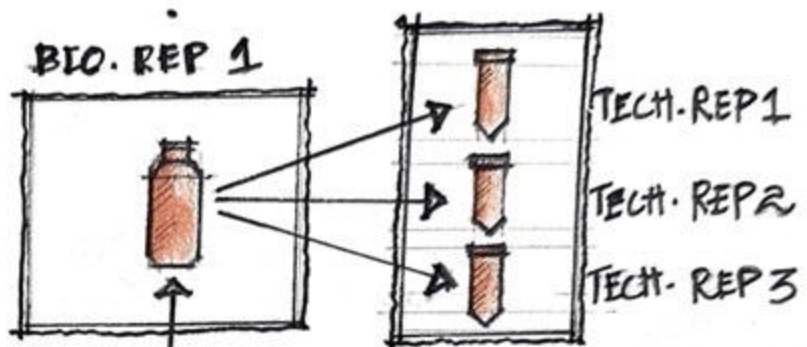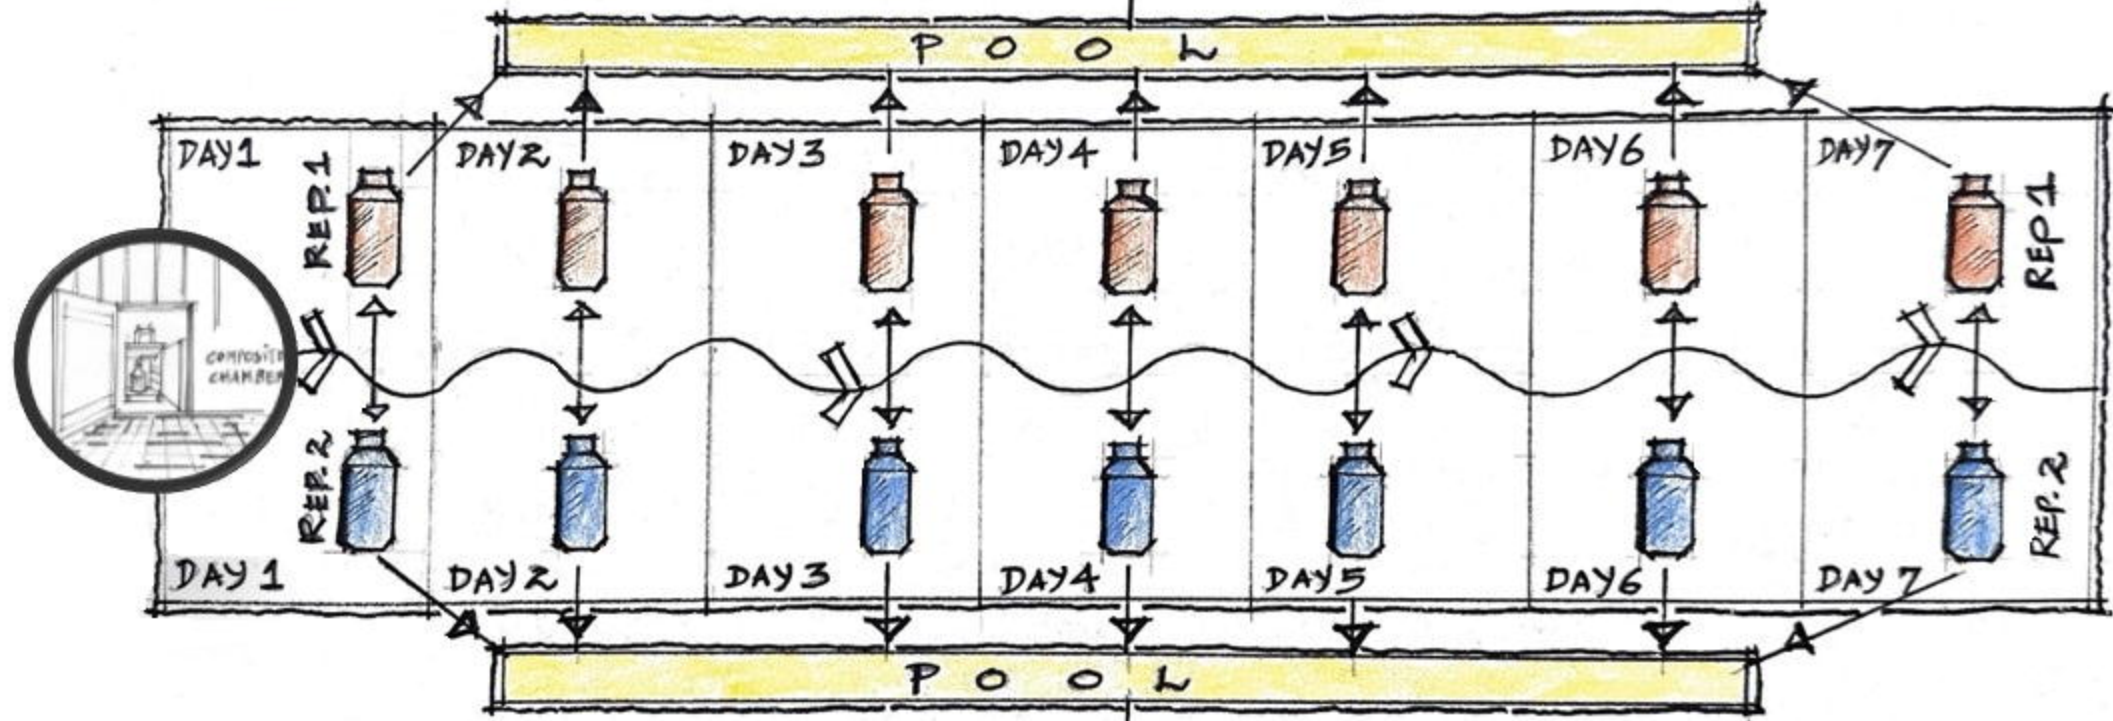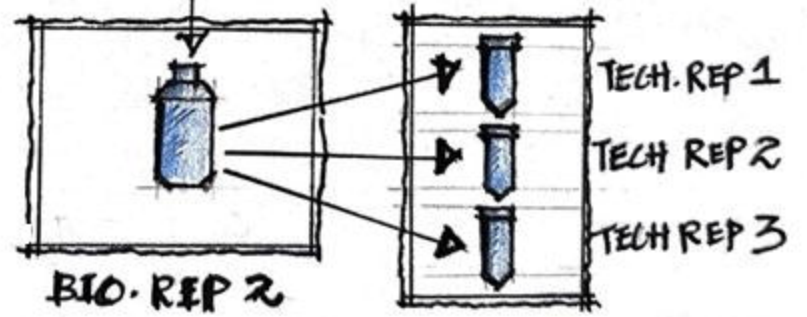

Source: https://medrxiv.org/content/medrxiv/early/2024/12/11/2024.12.10.24318772.full.pdf
