# Supplementary material for: Harnessing methods, data analysis, and near-real-time wastewater monitoring for enhanced public health response using high throughput sequencing
Source: bioRxiv or medRxiv preprint supplement (doi:10.1101/2024.12.10.24318772), 2024-12-11
Supplement: Supplementary file [file media-2.pdf]

**CFSAN/OAO  
BIostatistics and Bioinformatics Staff**

**WASTEWATER SARS-COV2 ANALYSIS REPORT**

**Summary**

| Sample# | Sample name                       | Total #reads | Reads aligned PF* | Genomic coordinates 0X | Genomic coordinates <10X |
|---------|-----------------------------------|--------------|-------------------|------------------------|--------------------------|
| 1       | <a href="#">CFSANSMP000119220</a> | 1240436      | 748699 (60%)      | 401nt (1%)             | 1014nt (3%)              |
| 2       | <a href="#">CFSANSMP000119221</a> | 420127       | 304556 (72%)      | 481nt (1%)             | 3391nt (11%)             |
| 3       | <a href="#">CFSANSMP000119222</a> | 1536416      | 1447541 (94%)     | 406nt (1%)             | 733nt (2%)               |
| 4       | <a href="#">CFSANSMP000119223</a> | 487373       | 387336 (79%)      | 509nt (1%)             | 548nt (1%)               |
| 5       | <a href="#">CFSANSMP000119224</a> | 1115551      | 990602 (88%)      | 410nt (1%)             | 1350nt (4%)              |
| 6       | <a href="#">CFSANSMP000119225</a> | 561738       | 448028 (79%)      | 511nt (1%)             | 1874nt (6%)              |
| 7       | <a href="#">CFSANSMP000119226</a> | 1638438      | 1286629 (78%)     | 475nt (1%)             | 521nt (1%)               |
| 8       | <a href="#">CFSANSMP000119227</a> | 1336574      | 1005993 (75%)     | 480nt (1%)             | 513nt (1%)               |
| 9       | <a href="#">CFSANSMP000119228</a> | 1037901      | 725752 (69%)      | 503nt (1%)             | 517nt (1%)               |
| 10      | <a href="#">CFSANSMP000119229</a> | 1172436      | 794585 (67%)      | 441nt (1%)             | 511nt (1%)               |
| 11      | <a href="#">CFSANSMP000119231</a> | 1298984      | 1166947 (89%)     | 477nt (1%)             | 512nt (1%)               |
| 12      | <u>unclassified</u>               | 569329       | 462282 (81%)      | 406nt (1%)             | 509nt (1%)               |
| 13      | <u>Water</u>                      | 2964         | 2896 (97%)        | 13665nt (45%)          | 17534nt (58%)            |

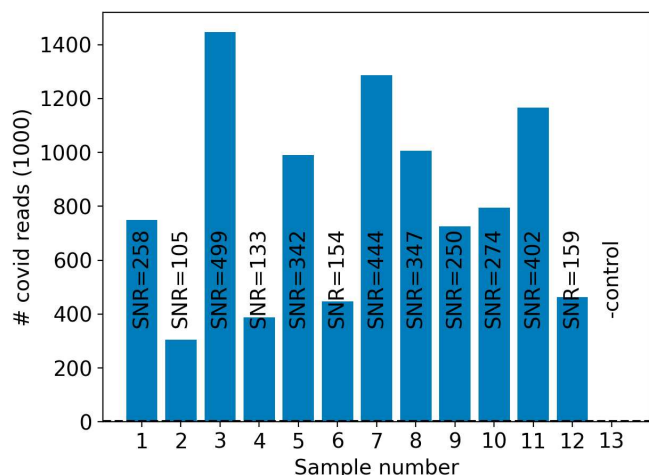

\*Quantity of raw reads that align to the reference sequence and pass filter, i.e. the read length after adaptor trimming  $\geq 30$  and minimum read quality  $\geq 20$  within a sliding window of width 4. SNR refers to the ratio of SC2-mapping reads aligned that pass filter in the sample vs. that in the auto-detected negative control samples (if any). The dashed line represents the baseline level of covid reads detected from the negative control or their average if multiple negative controls were included.

| QC category | Subjective definition                                   | Objective metrics                                                                                                                                                                          |
|-------------|---------------------------------------------------------|--------------------------------------------------------------------------------------------------------------------------------------------------------------------------------------------|
| A           | No QC issues evident                                    | 0x coordinates <1%<br>10x coordinates <5%<br>average coverage > 1000X<br>average quality score >35 for Illumina, >15 if ONT,<br>>70 if PacBio HiFi<br>most abundant taxon is coronavirinae |
| B           | Some QC issues, but accurate variant calling possible   | 0x coordinates <20%<br>10X coordinates < 40%<br>>80% of diverse SNPs covered<br>average coverage > 100X<br>average quality score >35 for Illumina<br>>15 if ONT, >70 if PacBio HiFi        |
| C           | Some QC issues, and accurate variant calling impossible | 0x coordinates <99%<br>10X coordinates <95%                                                                                                                                                |
| F           | Significant QC/study design issues                      | Contamination (SNR<50)<br>No/negligible coverage (< 1X)<br>Biological/technical replicates' results are irreconcilable.                                                                    |

| Sample Number | Suggested category | Suggested QC flags   |
|---------------|--------------------|----------------------|
| 1             | B/C                | low_coverage_breadth |
| 2             | B/C                | low_coverage_breadth |
| 3             | B/C                | low_coverage_breadth |
| 4             | B/C                | low_coverage_breadth |
| 5             | B/C                | low_coverage_breadth |
| 6             | B/C                | low_coverage_breadth |
| 7             | B/C                | low_coverage_breadth |
| 8             | B/C                | low_coverage_breadth |
| 9             | B/C                | low_coverage_breadth |
| 10            | B/C                | low_coverage_breadth |
| 11            | B/C                | low_coverage_breadth |
| 12            | B/C                | low_coverage_breadth |
| 13            | F                  | sample_contamination |

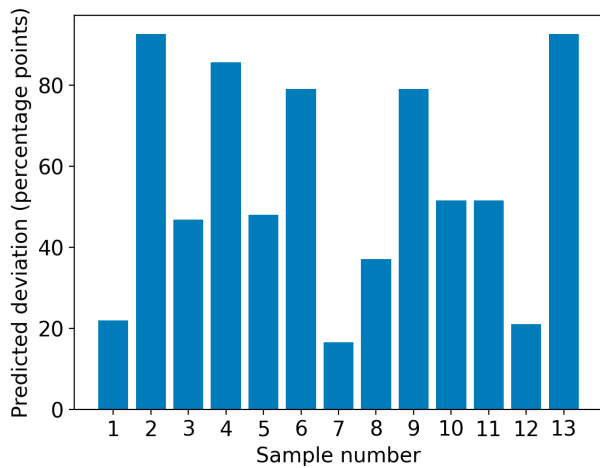

Machine-learning based prediction of the SC2 variant calling accuracy of Freyja of this dataset. The model is a random forest trained on FDA/CFSAN's experimental wastewater WGS data obtained in January 2022 and aims to assess the impact of the potential coverage gaps on the variant abundance estimates. The plotted values represent the predicted deviation of the omicron percentage points from the value that would have been obtained if the coverage was near-complete.

[CFSANSMP000119220](#)

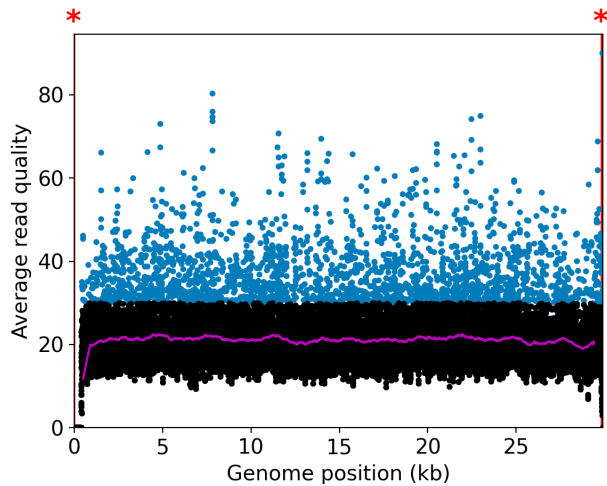

[CFSANSMP000119221](#)

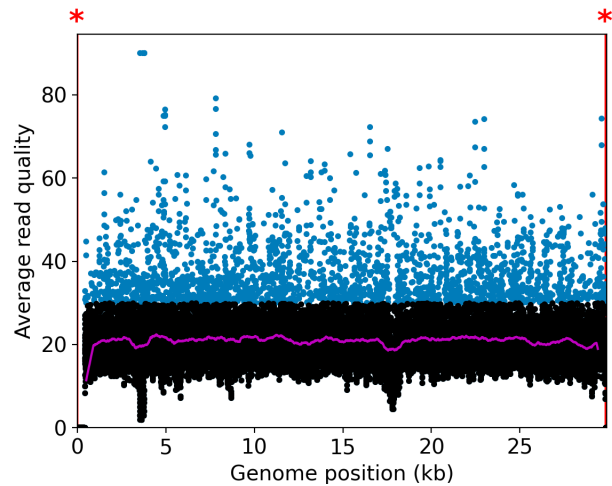

[CFSANSMP000119222](#)

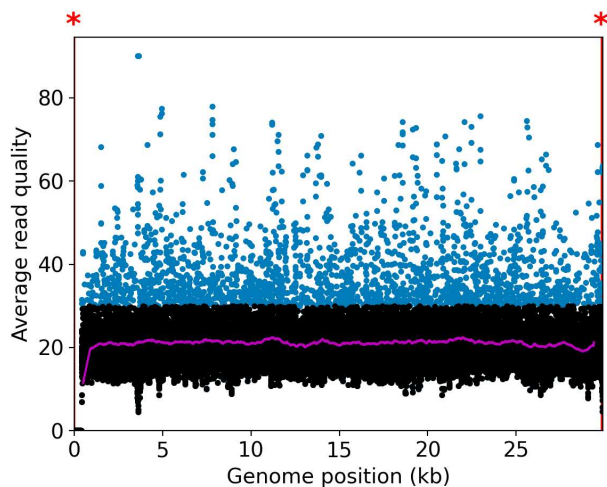

[CFSANSMP000119223](#)

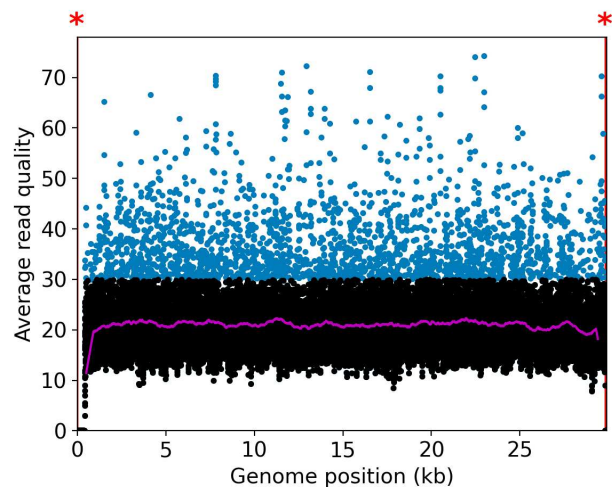

[CFSANSMP000119224](#)

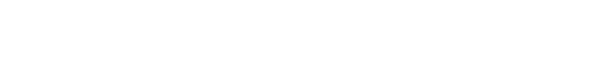

[CFSANSMP000119225](#)



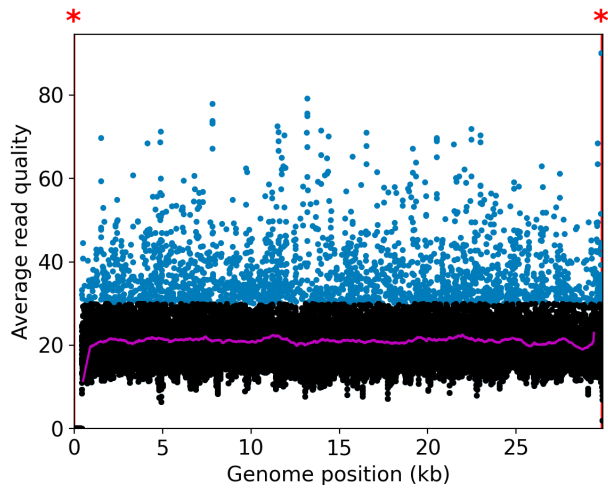

[CFSANSMP000119226](#)

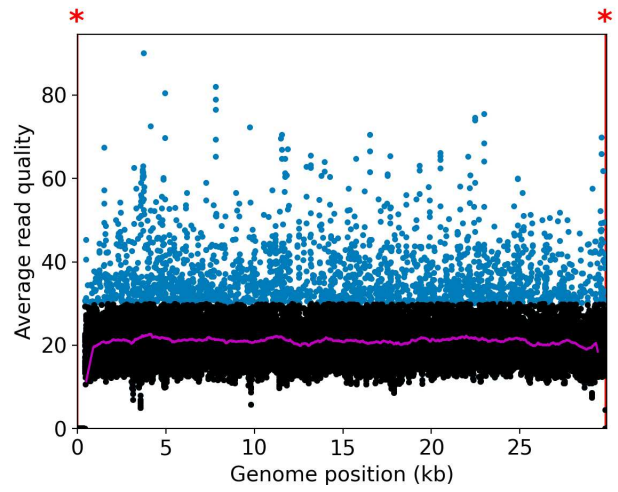

[CFSANSMP000119227](#)

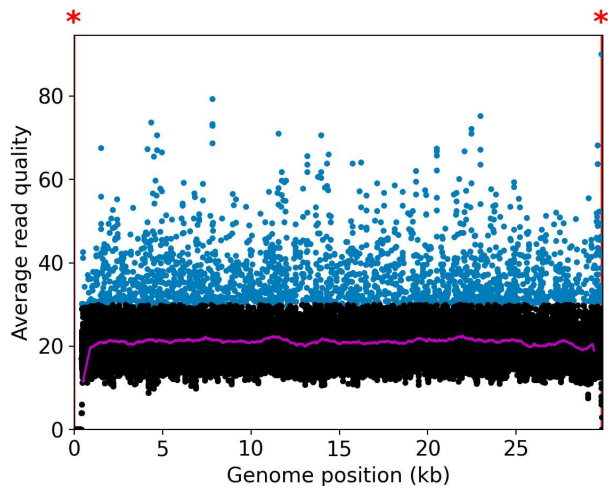

[CFSANSMP000119228](#)

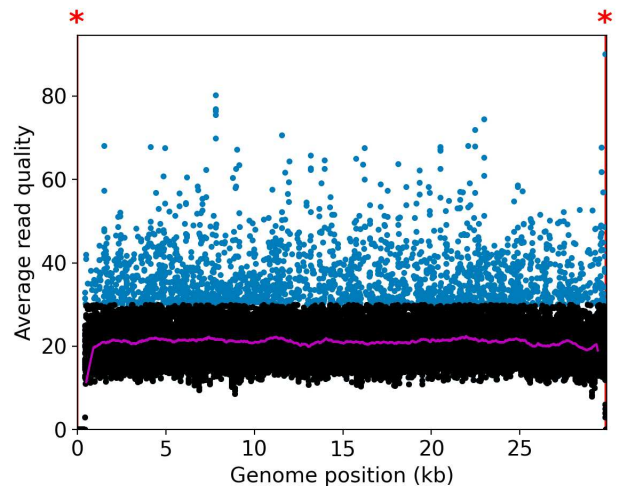

[CFSANSMP000119229](#)

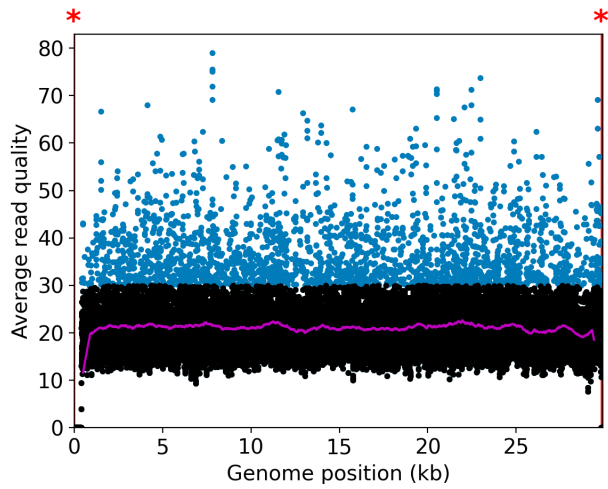

[CFSANSMP000119231](#)

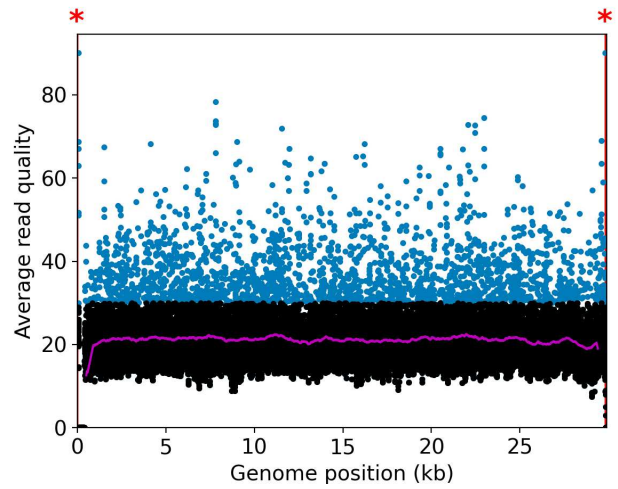

[unclassified](#)

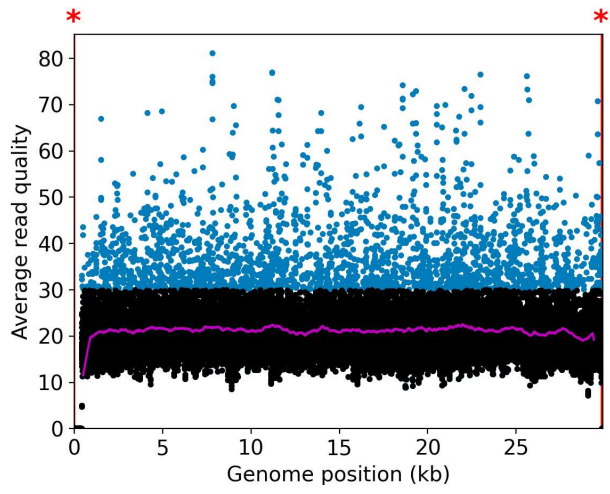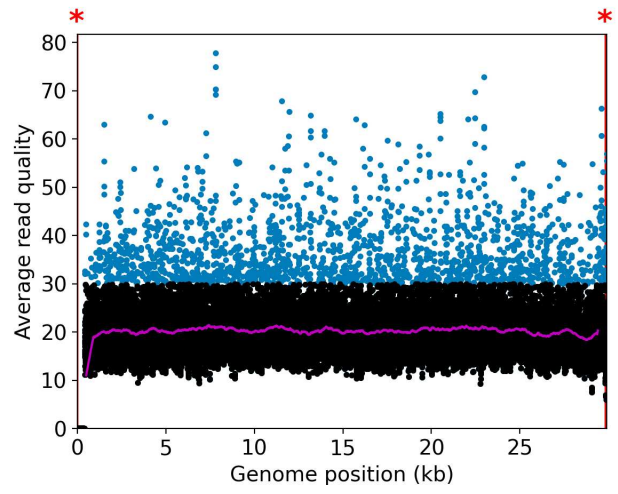

Water

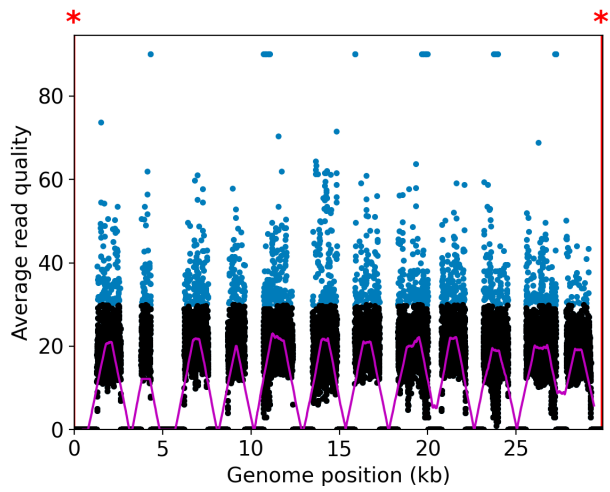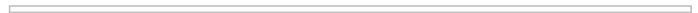

**CFSAN/OAO  
BIostatistics AND BIOinformatics STAFF**

# WASTEWATER SARS-COV2 ANALYSIS REPORT

|                                  |                                                                                                              |
|----------------------------------|--------------------------------------------------------------------------------------------------------------|
| Sample name:                     | CFSANSMP000119220                                                                                            |
| Date generated:                  | 2023-02-02, 09:14:16 EST                                                                                     |
| Timestamp of C-WAP version used: | Tue Jan 31 11:49:22 2023 -0500                                                                               |
| Executed by:                     | Jasmine Amirzadegan ( <a href="mailto:Jasmine.Amirzadegan@fda.hhs.gov">Jasmine.Amirzadegan@fda.hhs.gov</a> ) |
| Executed on:                     | 172.20.44.125 (aka n125.raven.cfsan)                                                                         |

## Sequencing summary

|                                      |                               |
|--------------------------------------|-------------------------------|
| Sequencing chemistry:                | Missing with Missing          |
| Source site:                         | <a href="#">Missing (?.?)</a> |
| Sampling date:                       | Missing                       |
| Collected by:                        | Missing                       |
| Sequenced by:                        | Missing                       |
| Total number of reads:               | 1240436                       |
| Reads aligned:                       | 748711 (60%)                  |
| Average read quality:                | 19.8                          |
| Average read length:                 | 693                           |
| Reads passing filter:                | 748699 (60%)                  |
| Average read quality passing filter: | 19.8                          |
| Average read length passing filter:  | 693                           |
| Average coverage passing filter:     | 17351X                        |

A read passes filter if the read length after adaptor trimming  $\geq 30$  and minimum read quality  $\geq 20$  within a sliding window of width 4.

## Overall sequence characteristics

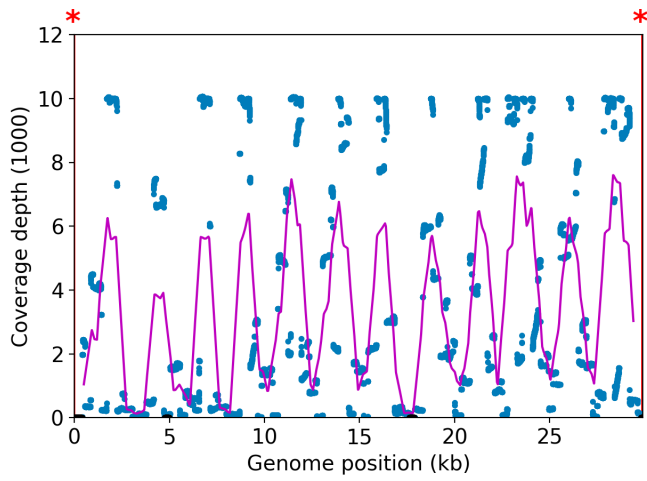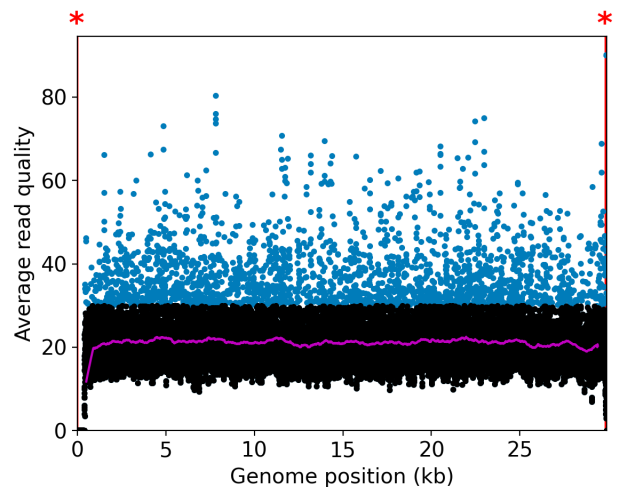

NOTE: The red shaded areas marked with a (\*) are not covered by the design of the library preparation kit and hence excluded from analyses. Magenta curves represent moving average with a window width of 1kb.

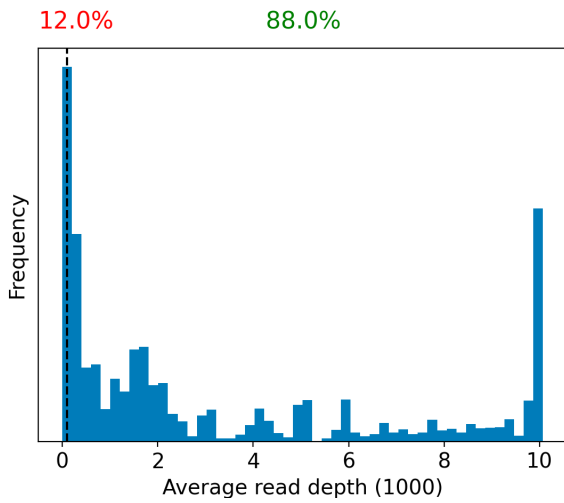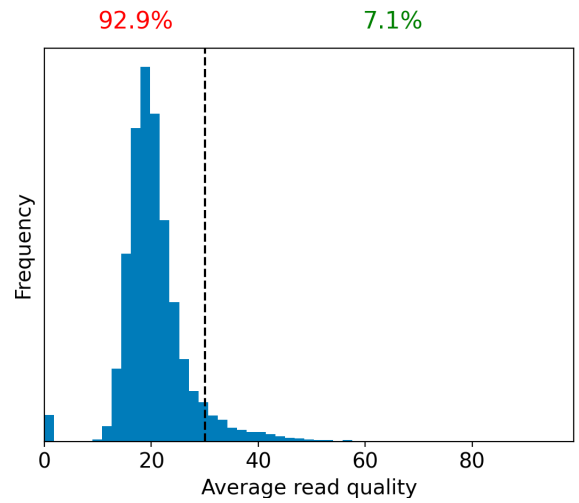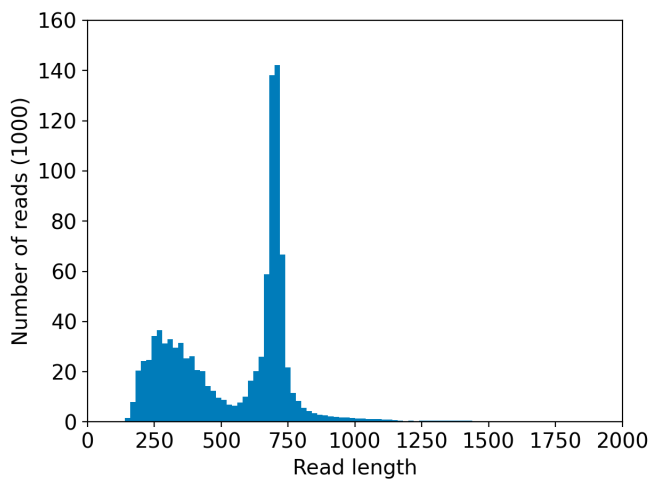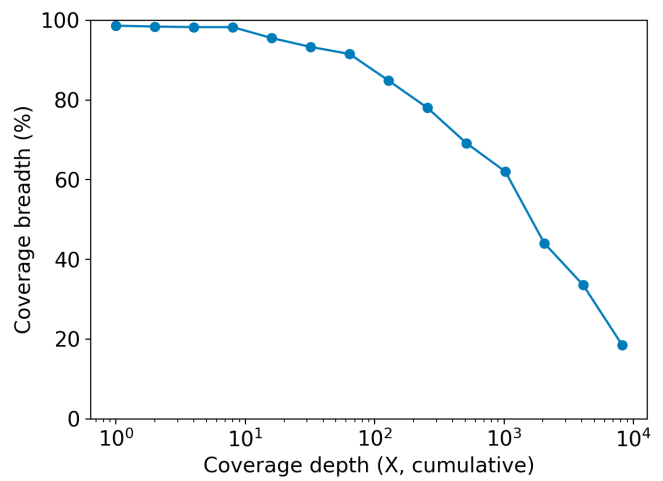

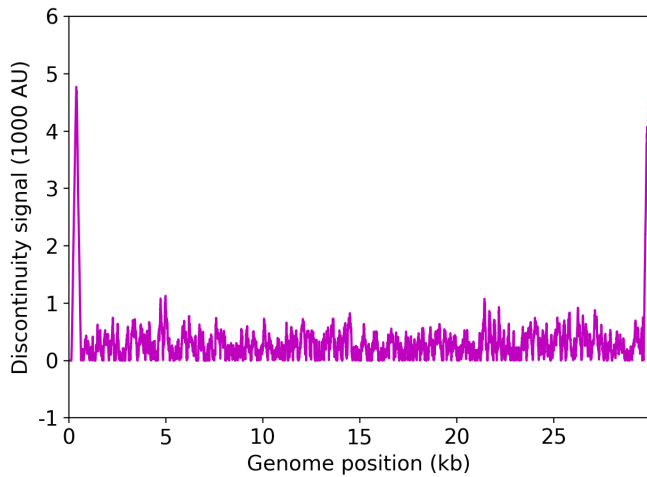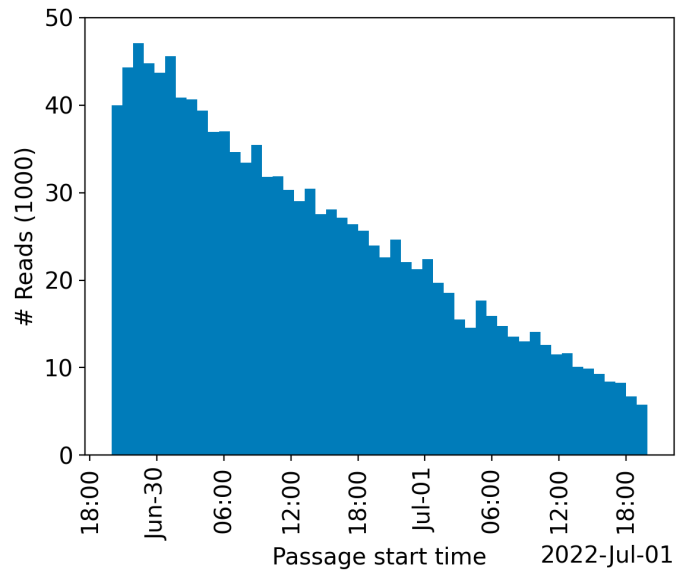

|                                                   | Uncovered coordinates (0X) | Poorly covered coordinates (<10X) |
|---------------------------------------------------|----------------------------|-----------------------------------|
| # Inaccessible genomic coordinates by kit design: | 152nt (0%)                 | 152nt (0%)                        |
| All genomic coordinates:                          | 401nt (1%)                 | 1014nt (3%)                       |
| Common SNPs:                                      | 1nt (2%)                   | 1nt (2%)                          |
| Diverse SNPs:                                     | 2nt (0%)                   | 29nt (12%)                        |
| Rare SNPs:                                        | 49nt (5%)                  | 66nt (7%)                         |

SNPs refer to the polymorphic sites currently in circulation that were detected out of recent GISAID entries. The sites that differ from the SC2 reference sequence are denoted as "common" if [90%, 100%] of the submissions carry this mutation, whereas those that are prevalent in [0%,10%] of the submissions are grouped under the "rare" category. The population is still diverse at the mutation sites that are observed in (10%,90%) of the entries and these coordinates are grouped under the "diverse" category.

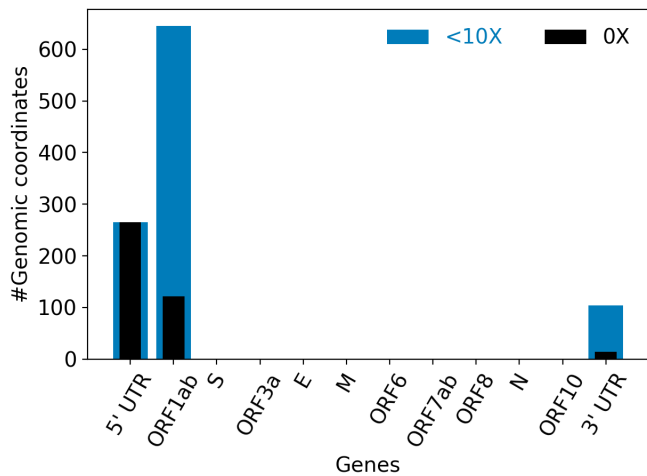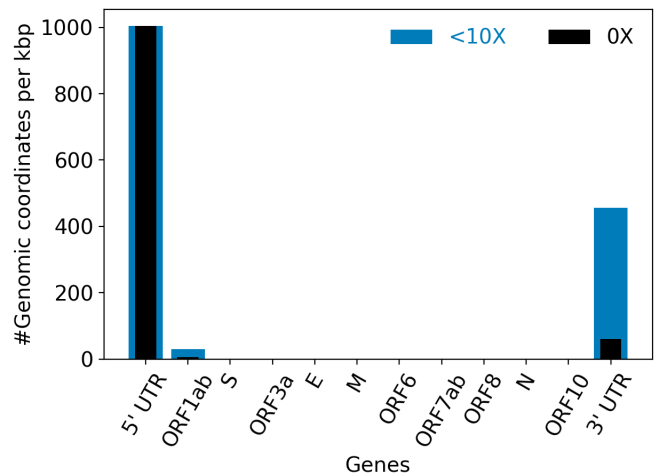

|                                                     |                        |
|-----------------------------------------------------|------------------------|
| Hits to SARS-Cov2 genome (kraken2):                 | 743646 reads (59.95%)  |
| Hits to human genome (kraken2):                     | 18681 reads (1.51%)    |
| Hits to synthetic sequences (kraken2, taxid 28384): | 0 reads (0.00%)        |
|                                                     | Coronaviridae (59.95%) |



Most abundant organisms (kraken2, family level):

Hominidae (1.51%)  
Arcobacteraceae (0.85%)  
Enterobacteriaceae (0.37%)  
Comamonadaceae (0.25%)

## Detected variants (Experimental)

Abundance of variants by linear regression

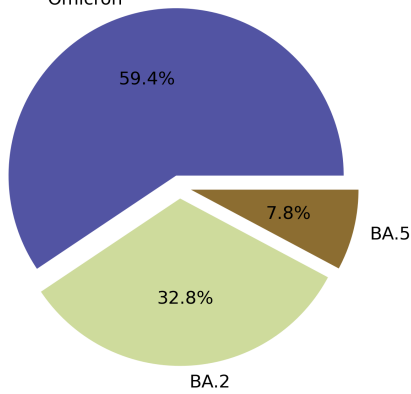

Abundance of variants by kallisto

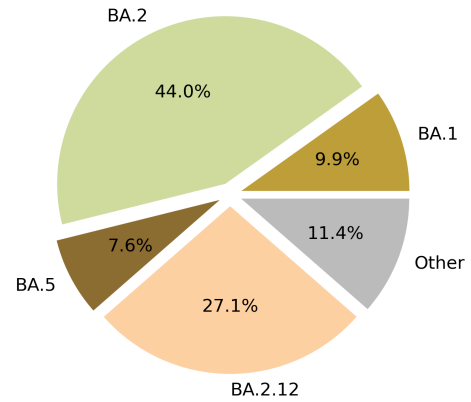

Based on deconvolution, [B.1.1.529](#) is estimated to constitute 59.39% of the viral particles and hence is the most abundant variant in the sample. The  $R^2$  for the linear regression was 0.63. Variants that were detected less than 5% were grouped under "Other"

Based on the consensus sequence of the observed reads, the "ensemble-averaged sequence" most closely resembles the [BA.2](#) lineage. If this is a sample consisting of a single source of pathogens or an overwhelming majority of the different sources are infected with the same variant, the sample is dominated by this variant.

Based on mapping individual reads to the variant consensus sequences in the reference database, kallisto predicts that the sample is dominated by [BA.2](#) lineage. Accuracy of this measure is expected to improve if the input data consists of long reads as opposed to convolution.

Abundance of variants by kraken2+bracken, using majorCovid DB

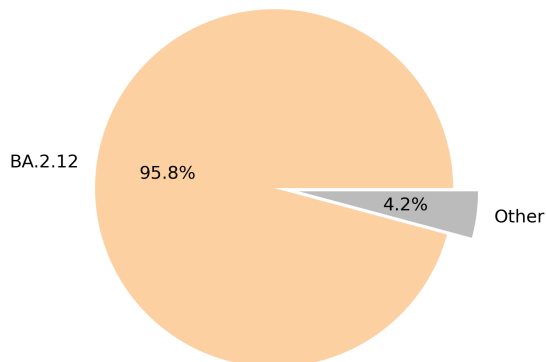

Abundance of variants by Freyja

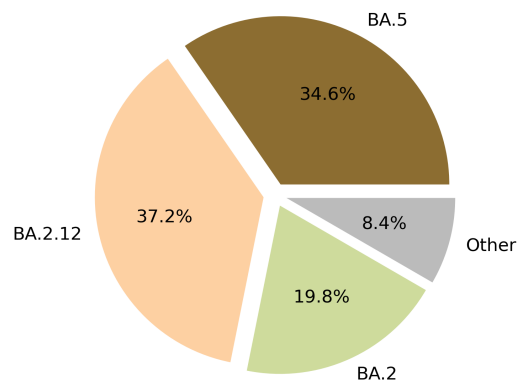

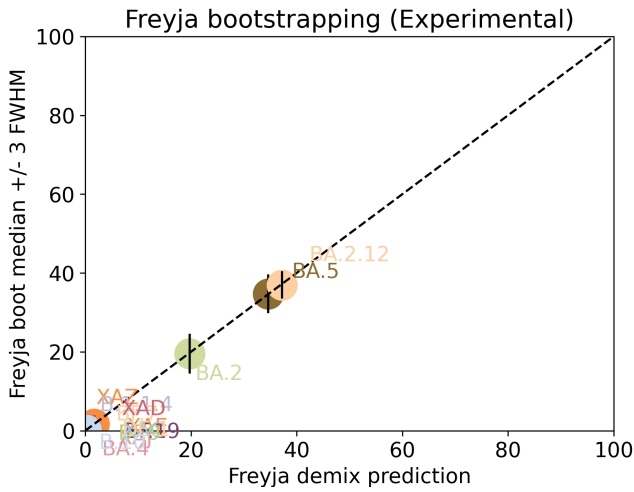

Under the assumption that the presence of a variant requires the detection of all respective mutations of the variant, the characteristic mutations which support the presence of the respective variant are indicated in the respective column of the table. Numbers show the number of mutations detected, if any, and the number of mutations expected to be present based on the variant definitions.

| VOC                               | <a href="#">B.1.617.2</a>                  | <a href="#">BA.1</a>                                                         | <a href="#">BA.2</a>                                                                                                                                                                                                                                                                                                                           | <a href="#">BA.3</a>                                                                                                                                                 | <a href="#">BA.4</a>                                                                                                                                                                                                                                                                                                     | <a href="#">BA.5</a>                                                                                                                                                                                                                                                                       |
|-----------------------------------|--------------------------------------------|------------------------------------------------------------------------------|------------------------------------------------------------------------------------------------------------------------------------------------------------------------------------------------------------------------------------------------------------------------------------------------------------------------------------------------|----------------------------------------------------------------------------------------------------------------------------------------------------------------------|--------------------------------------------------------------------------------------------------------------------------------------------------------------------------------------------------------------------------------------------------------------------------------------------------------------------------|--------------------------------------------------------------------------------------------------------------------------------------------------------------------------------------------------------------------------------------------------------------------------------------------|
| Characteristic mutations detected | (3 of 13)<br>S:G142D<br>S:L452R<br>S:T478K | (5 of 26)<br>M:D3G<br>NUC:C25000T<br>NUC:C25584T<br>ORF1AB:I3758V<br>S:Q493R | (23 of 31)<br>N:S413R<br>NUC:A20055G<br>NUC:A9424G<br>NUC:C10198T<br>NUC:C12880T<br>NUC:C15714T<br>NUC:C25000T<br>NUC:C25584T<br>NUC:C26858T<br>NUC:C4321T<br>NUC:G10447A<br>ORF1AB:G1307S<br>ORF1AB:L3027F<br>ORF1AB:L3201F<br>ORF1AB:S135R<br>ORF1AB:T3090I<br>ORF1AB:T842I<br>S:D405N<br>S:Q493R<br>S:R408S<br>S:S371F<br>S:T19I<br>S:T376A | (11 of 21)<br>N:S413R<br>NUC:C12880T<br>NUC:C15714T<br>NUC:C26858T<br>NUC:G10447A<br>ORF1AB:G1307S<br>ORF1AB:S135R<br>ORF1AB:T3090I<br>S:D405N<br>S:Q493R<br>S:S371F | (22 of 31)<br>N:S413R<br>NUC:A20055G<br>NUC:C10198T<br>NUC:C12880T<br>NUC:C15714T<br>NUC:C25000T<br>NUC:C25584T<br>NUC:C26858T<br>NUC:C4321T<br>NUC:G10447A<br>NUC:G27788T<br>ORF1AB:G1307S<br>ORF1AB:S135R<br>ORF1AB:T3090I<br>ORF1AB:T842I<br>S:D405N<br>S:F486V<br>S:L452R<br>S:S371F<br>S:T19I<br>S:T376A<br>S:V213G | (20 of 28)<br>N:S413R<br>NUC:A20055G<br>NUC:C10198T<br>NUC:C12880T<br>NUC:C15714T<br>NUC:C25000T<br>NUC:C25584T<br>NUC:C4321T<br>NUC:G10447A<br>ORF1AB:G1307S<br>ORF1AB:S135R<br>ORF1AB:T3090I<br>ORF1AB:T842I<br>S:D405N<br>S:F486V<br>S:L452R<br>S:S371F<br>S:T19I<br>S:T376A<br>S:V213G |

[Jaccard Index](#) is a measure of similarity between two sets A and B, reaching the maximum value of 1 if A=B and minimum value of 0 if  $A \cap B = \{\}$ . In the c(d) representation below, c represents the Jaccard index of the set of mutations that were experimentally detected for this sample as listed above, whereas d refers to the ideal value of the Jaccard index expected from complete genome coverage without any sequencing errors.

|                           | <a href="#">B.1.617.2</a>     | <a href="#">BA.1</a>          | <a href="#">BA.2</a>          | <a href="#">BA.3</a>          | <a href="#">BA.4</a>          | <a href="#">BA.5</a>          |
|---------------------------|-------------------------------|-------------------------------|-------------------------------|-------------------------------|-------------------------------|-------------------------------|
| <a href="#">B.1.617.2</a> | 1.00 ( <a href="#">1.00</a> ) | 0.00 ( <a href="#">0.00</a> ) | 0.00 ( <a href="#">0.00</a> ) | 0.00 ( <a href="#">0.00</a> ) | 0.04 ( <a href="#">0.02</a> ) | 0.05 ( <a href="#">0.03</a> ) |
| <a href="#">BA.1</a>      | 0.00 ( <a href="#">0.00</a> ) | 1.00 ( <a href="#">1.00</a> ) | 0.12 ( <a href="#">0.10</a> ) | 0.07 ( <a href="#">0.21</a> ) | 0.08 ( <a href="#">0.08</a> ) | 0.09 ( <a href="#">0.08</a> ) |
| <a href="#">BA.2</a>      | 0.00 ( <a href="#">0.00</a> ) | 0.12 ( <a href="#">0.10</a> ) | 1.00 ( <a href="#">1.00</a> ) | 0.48 ( <a href="#">0.33</a> ) | 0.67 ( <a href="#">0.63</a> ) | 0.65 ( <a href="#">0.59</a> ) |
| <a href="#">BA.3</a>      | 0.00 ( <a href="#">0.00</a> ) | 0.07 ( <a href="#">0.21</a> ) | 0.48 ( <a href="#">0.33</a> ) | 1.00 ( <a href="#">1.00</a> ) | 0.43 ( <a href="#">0.30</a> ) | 0.41 ( <a href="#">0.29</a> ) |
| <a href="#">BA.4</a>      | 0.04 ( <a href="#">0.02</a> ) | 0.08 ( <a href="#">0.08</a> ) | 0.67 ( <a href="#">0.63</a> ) | 0.43 ( <a href="#">0.30</a> ) | 1.00 ( <a href="#">1.00</a> ) | 0.91 ( <a href="#">0.84</a> ) |

BA.5

0.05 ([0.03](#))

0.09 ([0.08](#))

0.65 ([0.59](#))

0.41 ([0.29](#))

0.91 ([0.84](#))

1.00 ([1.00](#))

## Detected mutations

Excluded from this pdf version due to file size limitations.

**CFSAN/OAO**  
**BIostatistics AND Bioinformatics Staff**

# WASTEWATER SARS-COV2 ANALYSIS REPORT

|                                  |                                                                                                              |
|----------------------------------|--------------------------------------------------------------------------------------------------------------|
| Sample name:                     | CFSANSMP000119221                                                                                            |
| Date generated:                  | 2023-02-02, 09:00:28 EST                                                                                     |
| Timestamp of C-WAP version used: | Tue Jan 31 11:49:22 2023 -0500                                                                               |
| Executed by:                     | Jasmine Amirzadegan ( <a href="mailto:Jasmine.Amirzadegan@fda.hhs.gov">Jasmine.Amirzadegan@fda.hhs.gov</a> ) |
| Executed on:                     | 172.20.44.121 (aka n121.raven.cfsan)                                                                         |

## Sequencing summary

|                                      |                               |
|--------------------------------------|-------------------------------|
| Sequencing chemistry:                | Missing with Missing          |
| Source site:                         | <a href="#">Missing (?.?)</a> |
| Sampling date:                       | Missing                       |
| Collected by:                        | Missing                       |
| Sequenced by:                        | Missing                       |
| Total number of reads:               | 420127                        |
| Reads aligned:                       | 304558 (72%)                  |
| Average read quality:                | 19.3                          |
| Average read length:                 | 665                           |
| Reads passing filter:                | 304556 (72%)                  |
| Average read quality passing filter: | 19.3                          |
| Average read length passing filter:  | 665                           |
| Average coverage passing filter:     | 6772X                         |

A read passes filter if the read length after adaptor trimming  $\geq 30$  and minimum read quality  $\geq 20$  within a sliding window of width 4.

## Overall sequence characteristics

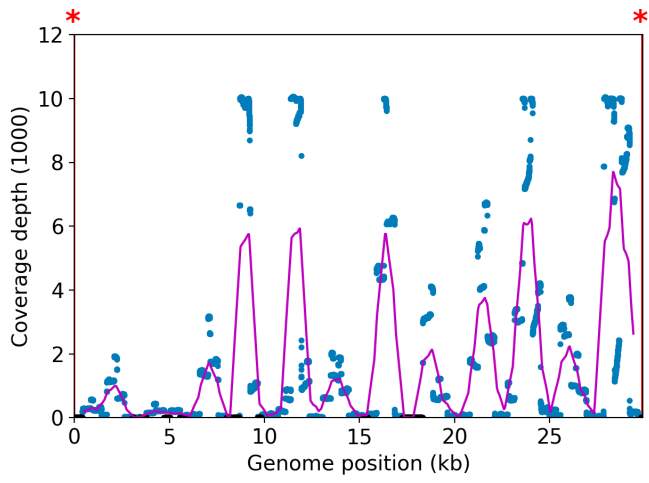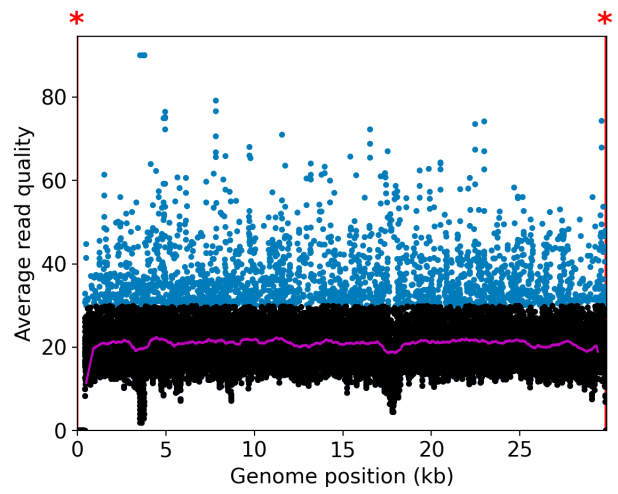

NOTE: The red shaded areas marked with a (\*) are not covered by the design of the library preparation kit and hence excluded from analyses. Magenta curves represent moving average with a window width of 1kb.

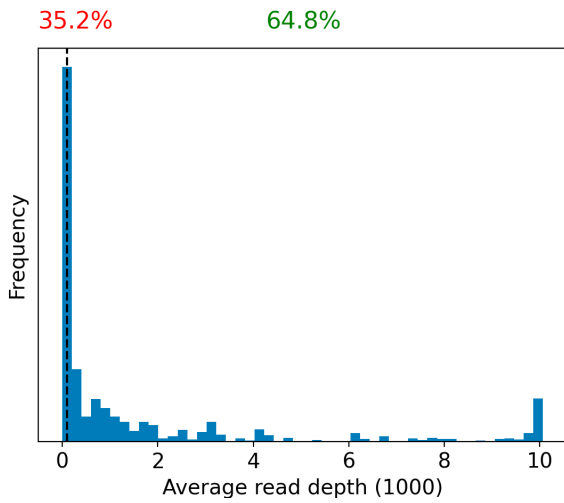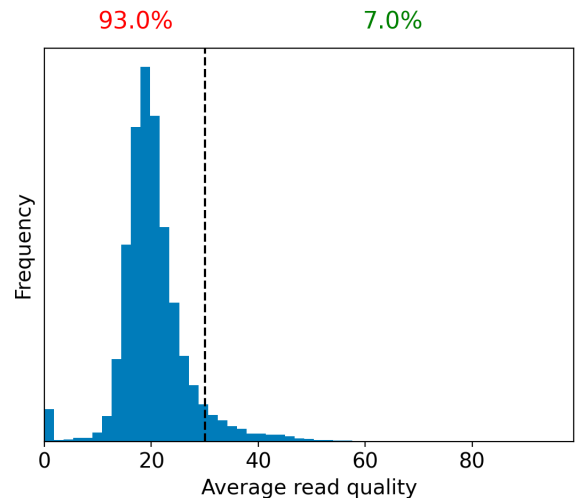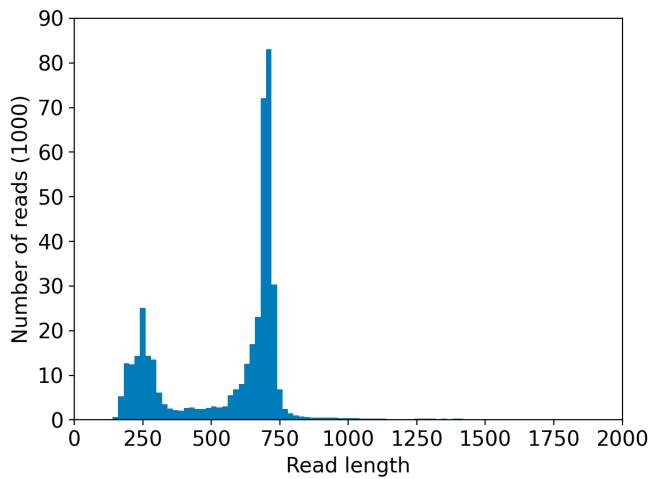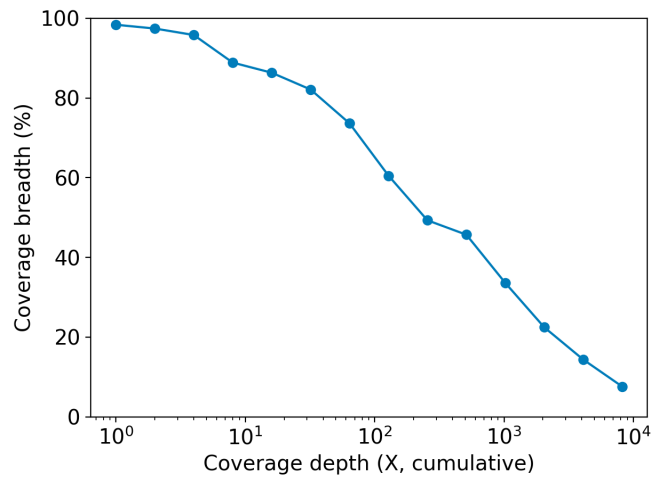

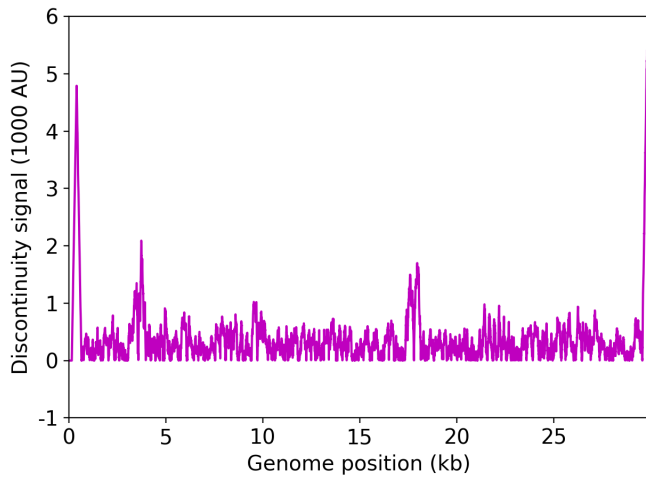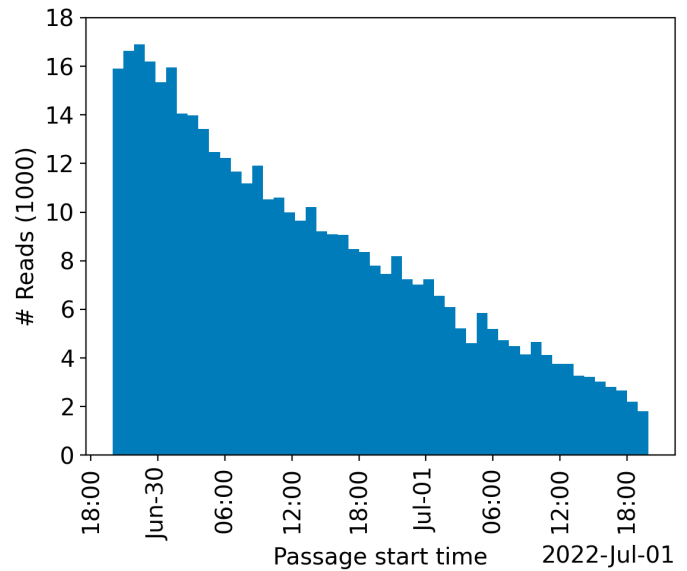

|                                                   | Uncovered coordinates (0X) | Poorly covered coordinates (<10X) |
|---------------------------------------------------|----------------------------|-----------------------------------|
| # Inaccessible genomic coordinates by kit design: | 152nt (0%)                 | 152nt (0%)                        |
| All genomic coordinates:                          | 481nt (1%)                 | 3391nt (11%)                      |
| Common SNPs:                                      | 1nt (2%)                   | 2nt (5%)                          |
| Diverse SNPs:                                     | 29nt (12%)                 | 32nt (14%)                        |
| Rare SNPs:                                        | 61nt (6%)                  | 66nt (7%)                         |

SNPs refer to the polymorphic sites currently in circulation that were detected out of recent GISAID entries. The sites that differ from the SC2 reference sequence are denoted as "common" if [90%, 100%] of the submissions carry this mutation, whereas those that are prevalent in [0%,10%] of the submissions are grouped under the "rare" category. The population is still diverse at the mutation sites that are observed in (10%,90%) of the entries and these coordinates are grouped under the "diverse" category.

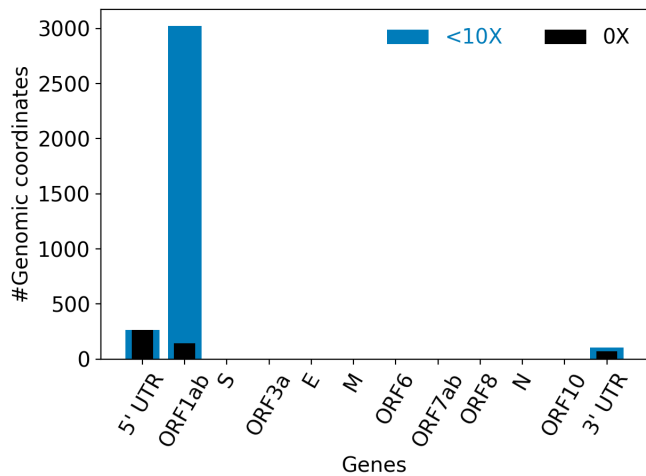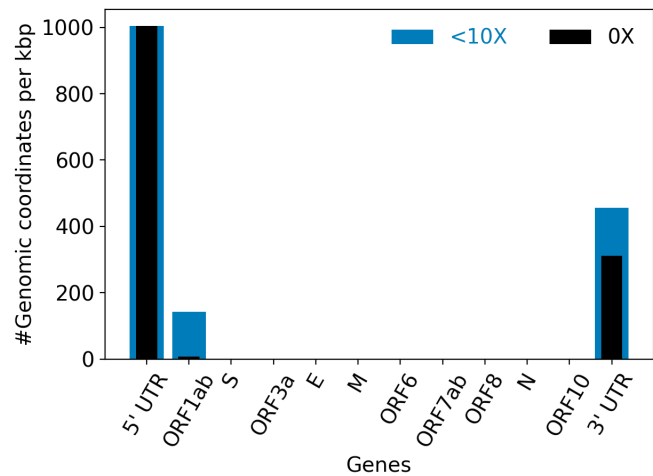

|                                                     |                        |
|-----------------------------------------------------|------------------------|
| Hits to SARS-Cov2 genome (kraken2):                 | 301382 reads (71.74%)  |
| Hits to human genome (kraken2):                     | 4549 reads (1.08%)     |
| Hits to synthetic sequences (kraken2, taxid 28384): | 0 reads (0.00%)        |
|                                                     | Coronaviridae (71.74%) |

Most abundant organisms (kraken2, family level):

Arcobacteraceae (1.84%)  
Hominidae (1.08%)  
Enterobacteriaceae (0.43%)  
Bacteroidaceae (0.36%)

## Detected variants (Experimental)

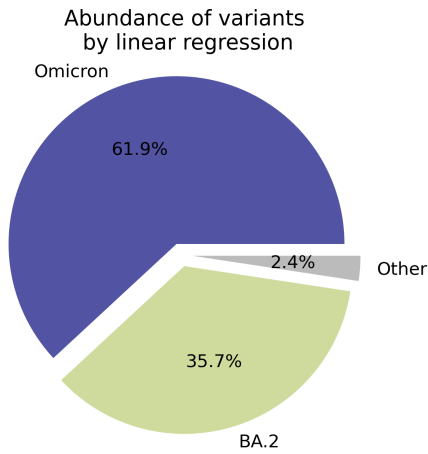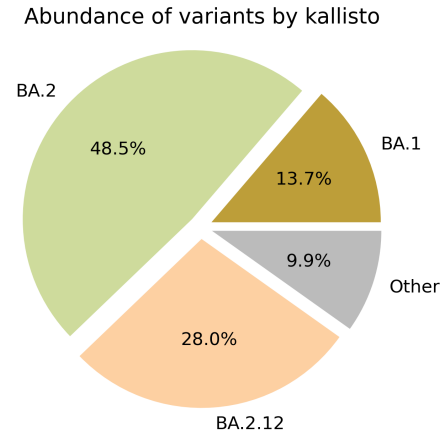

Based on deconvolution, [B.1.1.529](#) is estimated to constitute 61.94% of the viral particles and hence is the most abundant variant in the sample. The  $R^2$  for the linear regression was 0.64. Variants that were detected less than 5% were grouped under "Other"

Based on the consensus sequence of the observed reads, the "ensemble-averaged sequence" most closely resembles the [BA.2](#) lineage. If this is a sample consisting of a single source of pathogens or an overwhelming majority of the different sources are infected with the same variant, the sample is dominated by this variant.

Based on mapping individual reads to the variant consensus sequences in the reference database, kallisto predicts that the sample is dominated by [BA.2](#) lineage. Accuracy of this measure is expected to improve if the input data consists of long reads as opposed to convolution.

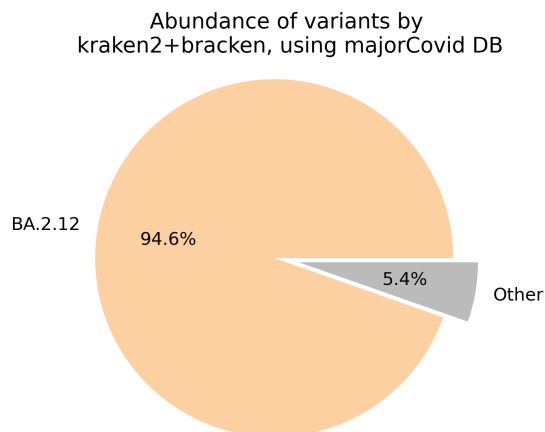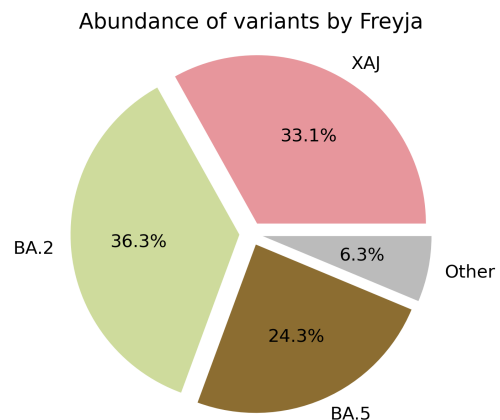

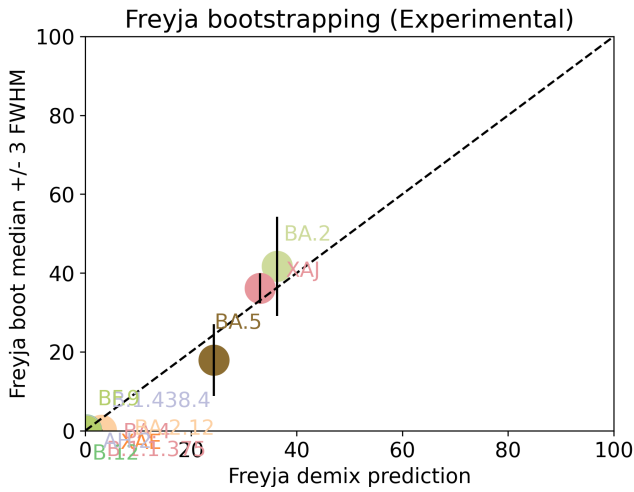

Under the assumption that the presence of a variant requires the detection of all respective mutations of the variant, the characteristic mutations which support the presence of the respective variant are indicated in the respective column of the table. Numbers show the number of mutations detected, if any, and the number of mutations expected to be present based on the variant definitions.

| VOC                               | <a href="#">B.1.617.2</a>                  | <a href="#">BA.1</a>                                                         | <a href="#">BA.2</a>                                                                                                                                                                                                                                                                                                            | <a href="#">BA.3</a>                                                                                                                                  | <a href="#">BA.4</a>                                                                                                                                                                                                                                                            | <a href="#">BA.5</a>                                                                                                                                                                                                                                                      |
|-----------------------------------|--------------------------------------------|------------------------------------------------------------------------------|---------------------------------------------------------------------------------------------------------------------------------------------------------------------------------------------------------------------------------------------------------------------------------------------------------------------------------|-------------------------------------------------------------------------------------------------------------------------------------------------------|---------------------------------------------------------------------------------------------------------------------------------------------------------------------------------------------------------------------------------------------------------------------------------|---------------------------------------------------------------------------------------------------------------------------------------------------------------------------------------------------------------------------------------------------------------------------|
| Characteristic mutations detected | (3 of 13)<br>S:G142D<br>S:L452R<br>S:T478K | (5 of 26)<br>M:D3G<br>NUC:C25000T<br>NUC:C25584T<br>ORF1AB:I3758V<br>S:Q493R | (22 of 31)<br>N:S413R<br>NUC:A20055G<br>NUC:A9424G<br>NUC:C10198T<br>NUC:C15714T<br>NUC:C25000T<br>NUC:C25584T<br>NUC:C26858T<br>NUC:C4321T<br>NUC:G10447A<br>ORF1AB:G1307S<br>ORF1AB:L3027F<br>ORF1AB:L3201F<br>ORF1AB:S135R<br>ORF1AB:T3090I<br>ORF1AB:T842I<br>S:D405N<br>S:Q493R<br>S:R408S<br>S:S371F<br>S:T19I<br>S:T376A | (10 of 21)<br>N:S413R<br>NUC:C15714T<br>NUC:C26858T<br>NUC:G10447A<br>ORF1AB:G1307S<br>ORF1AB:S135R<br>ORF1AB:T3090I<br>S:D405N<br>S:Q493R<br>S:S371F | (20 of 31)<br>N:S413R<br>NUC:A20055G<br>NUC:C10198T<br>NUC:C15714T<br>NUC:C25000T<br>NUC:C25584T<br>NUC:C4321T<br>NUC:G10447A<br>NUC:G27788T<br>ORF1AB:G1307S<br>ORF1AB:S135R<br>ORF1AB:T3090I<br>ORF1AB:T842I<br>S:D405N<br>S:F486V<br>S:L452R<br>S:S371F<br>S:T19I<br>S:T376A | (19 of 28)<br>M:D3N<br>N:S413R<br>NUC:A20055G<br>NUC:C10198T<br>NUC:C15714T<br>NUC:C25000T<br>NUC:C25584T<br>NUC:C4321T<br>NUC:G10447A<br>ORF1AB:G1307S<br>ORF1AB:S135R<br>ORF1AB:T3090I<br>ORF1AB:T842I<br>S:D405N<br>S:F486V<br>S:L452R<br>S:S371F<br>S:T19I<br>S:T376A |

**Jaccard Index** is a measure of similarity between two sets A and B, reaching the maximum value of 1 if A=B and minimum value of 0 if  $A \cap B = \{\}$ . In the c(d) representation below, c represents the Jaccard index of the set of mutations that were experimentally detected for this sample as listed above, whereas d refers to the ideal value of the Jaccard index expected from complete genome coverage without any sequencing errors.

|                           | <a href="#">B.1.617.2</a>     | <a href="#">BA.1</a>          | <a href="#">BA.2</a>          | <a href="#">BA.3</a>          | <a href="#">BA.4</a>          | <a href="#">BA.5</a>          |
|---------------------------|-------------------------------|-------------------------------|-------------------------------|-------------------------------|-------------------------------|-------------------------------|
| <a href="#">B.1.617.2</a> | 1.00 ( <a href="#">1.00</a> ) | 0.00 ( <a href="#">0.00</a> ) | 0.00 ( <a href="#">0.00</a> ) | 0.00 ( <a href="#">0.00</a> ) | 0.05 ( <a href="#">0.02</a> ) | 0.05 ( <a href="#">0.03</a> ) |
| <a href="#">BA.1</a>      | 0.00 ( <a href="#">0.00</a> ) | 1.00 ( <a href="#">1.00</a> ) | 0.12 ( <a href="#">0.10</a> ) | 0.07 ( <a href="#">0.21</a> ) | 0.09 ( <a href="#">0.08</a> ) | 0.09 ( <a href="#">0.08</a> ) |
| <a href="#">BA.2</a>      | 0.00 ( <a href="#">0.00</a> ) | 0.12 ( <a href="#">0.10</a> ) | 1.00 ( <a href="#">1.00</a> ) | 0.45 ( <a href="#">0.33</a> ) | 0.68 ( <a href="#">0.63</a> ) | 0.64 ( <a href="#">0.59</a> ) |
| <a href="#">BA.3</a>      | 0.00 ( <a href="#">0.00</a> ) | 0.07 ( <a href="#">0.21</a> ) | 0.45 ( <a href="#">0.33</a> ) | 1.00 ( <a href="#">1.00</a> ) | 0.43 ( <a href="#">0.30</a> ) | 0.38 ( <a href="#">0.29</a> ) |
| <a href="#">BA.4</a>      | 0.05 ( <a href="#">0.02</a> ) | 0.09 ( <a href="#">0.08</a> ) | 0.68 ( <a href="#">0.63</a> ) | 0.43 ( <a href="#">0.30</a> ) | 1.00 ( <a href="#">1.00</a> ) | 0.86 ( <a href="#">0.84</a> ) |



BA.5

0.05 ([0.03](#))

0.09 ([0.08](#))

0.64 ([0.59](#))

0.38 ([0.29](#))

0.86 ([0.84](#))

1.00 ([1.00](#))

## Detected mutations

Excluded from this pdf version due to file size limitations.

**CFSAN/OAO  
BIostatistics AND BIOinformatics STAFF**

# WASTEWATER SARS-COV2 ANALYSIS REPORT

|                                  |                                                                                                              |
|----------------------------------|--------------------------------------------------------------------------------------------------------------|
| Sample name:                     | CFSANSMP000119222                                                                                            |
| Date generated:                  | 2023-02-02, 09:12:45 EST                                                                                     |
| Timestamp of C-WAP version used: | Tue Jan 31 11:49:22 2023 -0500                                                                               |
| Executed by:                     | Jasmine Amirzadegan ( <a href="mailto:Jasmine.Amirzadegan@fda.hhs.gov">Jasmine.Amirzadegan@fda.hhs.gov</a> ) |
| Executed on:                     | 172.20.44.125 (aka n125.raven.cfsan)                                                                         |

## Sequencing summary

|                                      |                               |
|--------------------------------------|-------------------------------|
| Sequencing chemistry:                | Missing with Missing          |
| Source site:                         | <a href="#">Missing (?.?)</a> |
| Sampling date:                       | Missing                       |
| Collected by:                        | Missing                       |
| Sequenced by:                        | Missing                       |
| Total number of reads:               | 1536416                       |
| Reads aligned:                       | 1447547 (94%)                 |
| Average read quality:                | 19.8                          |
| Average read length:                 | 684                           |
| Reads passing filter:                | 1447541 (94%)                 |
| Average read quality passing filter: | 19.8                          |
| Average read length passing filter:  | 684                           |
| Average coverage passing filter:     | 33110X                        |

A read passes filter if the read length after adaptor trimming  $\geq 30$  and minimum read quality  $\geq 20$  within a sliding window of width 4.

## Overall sequence characteristics

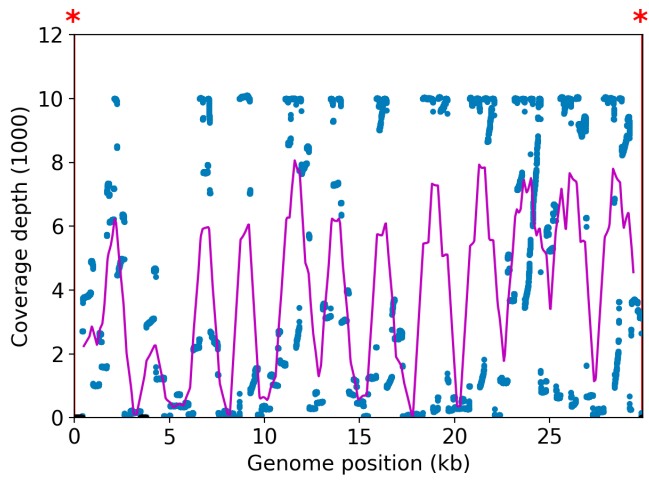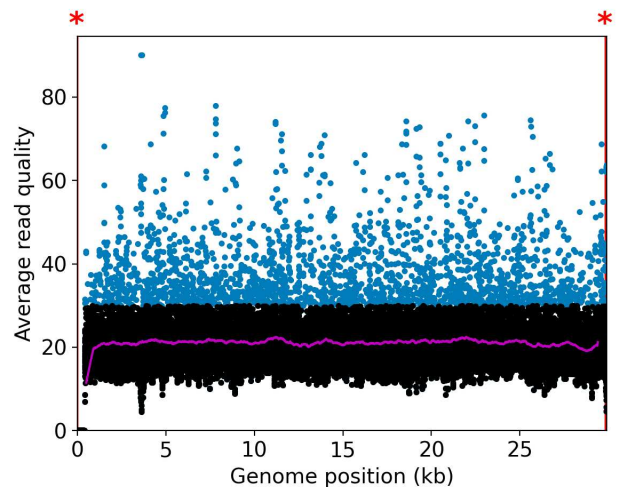

NOTE: The red shaded areas marked with a (\*) are not covered by the design of the library preparation kit and hence excluded from analyses. Magenta curves represent moving average with a window width of 1kb.

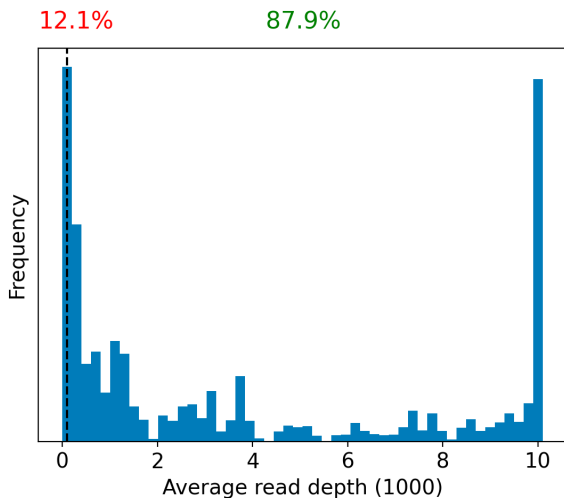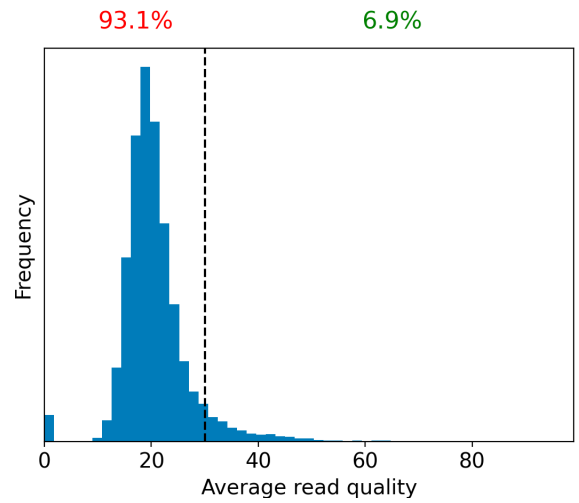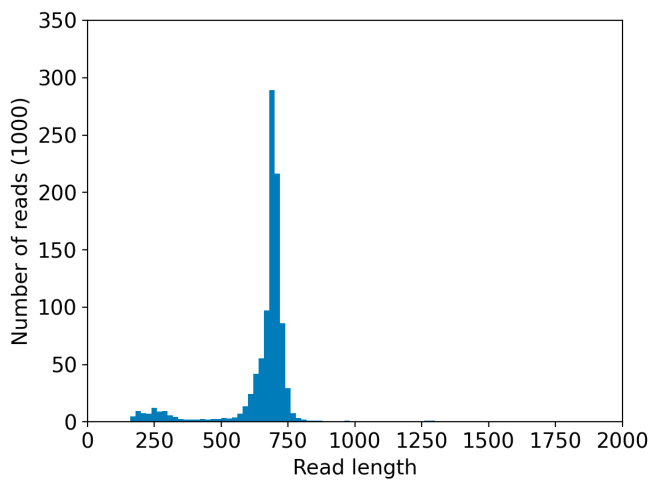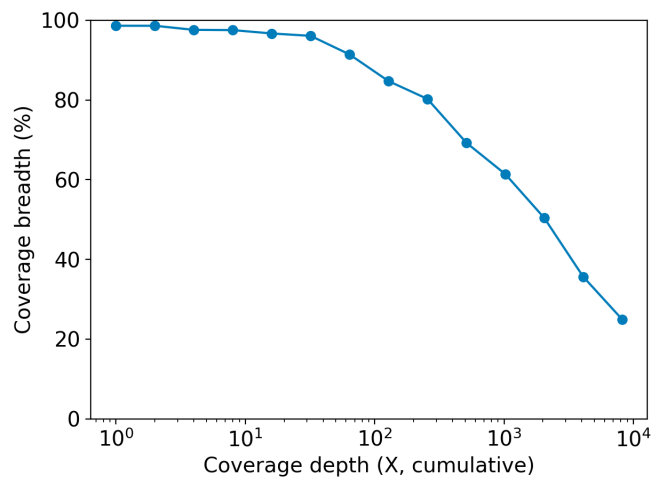

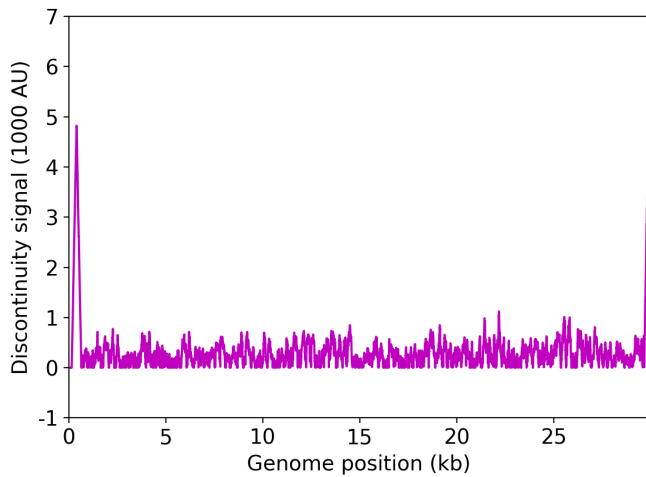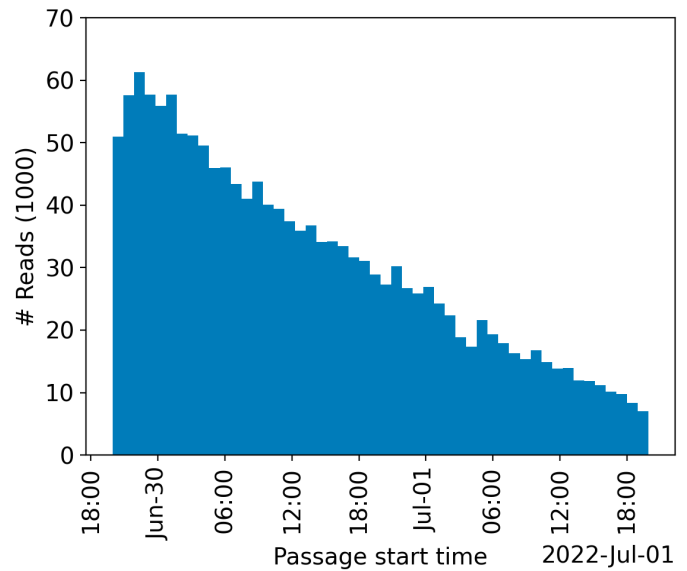

|                                                   | Uncovered coordinates (0X) | Poorly covered coordinates (<10X) |
|---------------------------------------------------|----------------------------|-----------------------------------|
| # Inaccessible genomic coordinates by kit design: | 152nt (0%)                 | 152nt (0%)                        |
| All genomic coordinates:                          | 406nt (1%)                 | 733nt (2%)                        |
| Common SNPs:                                      | 1nt (2%)                   | 1nt (2%)                          |
| Diverse SNPs:                                     | 2nt (0%)                   | 29nt (12%)                        |
| Rare SNPs:                                        | 49nt (5%)                  | 61nt (6%)                         |

SNPs refer to the polymorphic sites currently in circulation that were detected out of recent GISAID entries. The sites that differ from the SC2 reference sequence are denoted as "common" if [90%, 100%] of the submissions carry this mutation, whereas those that are prevalent in [0%,10%] of the submissions are grouped under the "rare" category. The population is still diverse at the mutation sites that are observed in (10%,90%) of the entries and these coordinates are grouped under the "diverse" category.

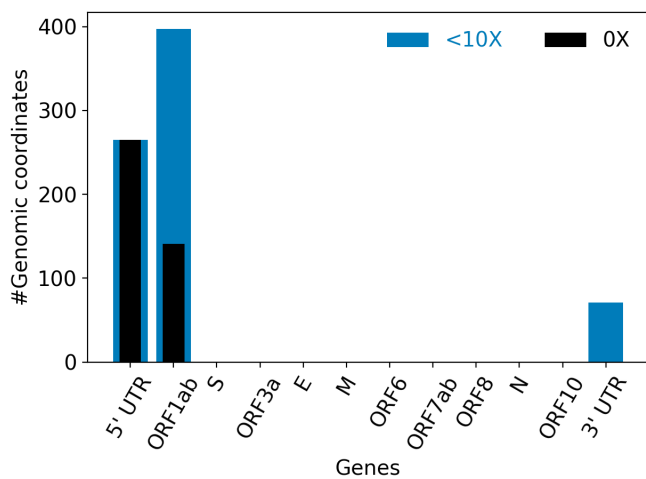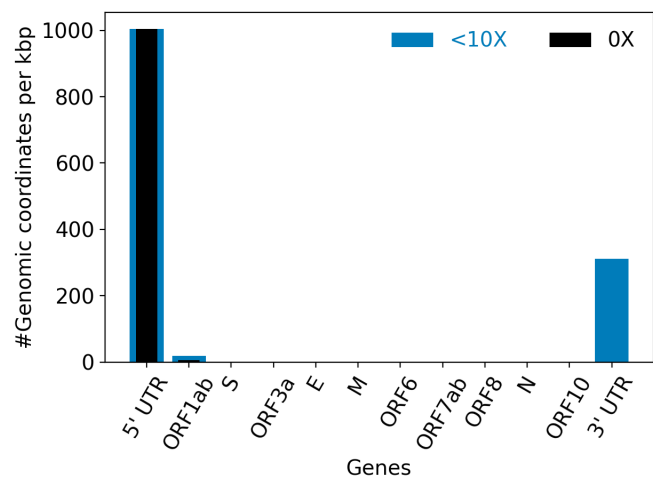

|                                                     |                        |
|-----------------------------------------------------|------------------------|
| Hits to SARS-Cov2 genome (kraken2):                 | 1435289 reads (93.42%) |
| Hits to human genome (kraken2):                     | 7983 reads (0.52%)     |
| Hits to synthetic sequences (kraken2, taxid 28384): | 0 reads (0.00%)        |
|                                                     | Coronaviridae (93.42%) |

Most abundant organisms (kraken2, family level):

Hominidae (0.52%)  
Arcobacteraceae (0.48%)  
Enterobacteriaceae (0.10%)  
Bacteroidaceae (0.06%)

## Detected variants (Experimental)

Abundance of variants by linear regression

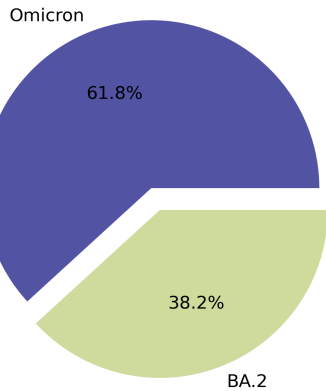

Abundance of variants by kallisto

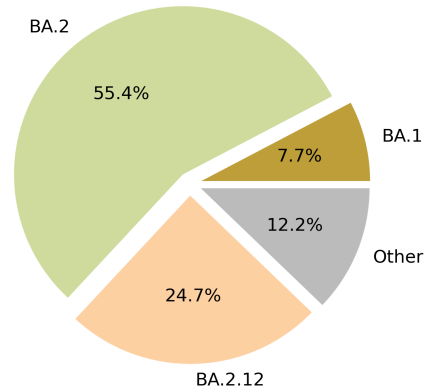

Based on deconvolution, [B.1.1.529](#) is estimated to constitute 61.81% of the viral particles and hence is the most abundant variant in the sample. The  $R^2$  for the linear regression was 0.64. Variants that were detected less than 5% were grouped under "Other"

Based on the consensus sequence of the observed reads, the "ensemble-averaged sequence" most closely resembles the [BA.2](#) lineage. If this is a sample consisting of a single source of pathogens or an overwhelming majority of the different sources are infected with the same variant, the sample is dominated by this variant.

Based on mapping individual reads to the variant consensus sequences in the reference database, kallisto predicts that the sample is dominated by [BA.2](#) lineage. Accuracy of this measure is expected to improve if the input data consists of long reads as opposed to convolution.

Abundance of variants by kraken2+bracken, using majorCovid DB

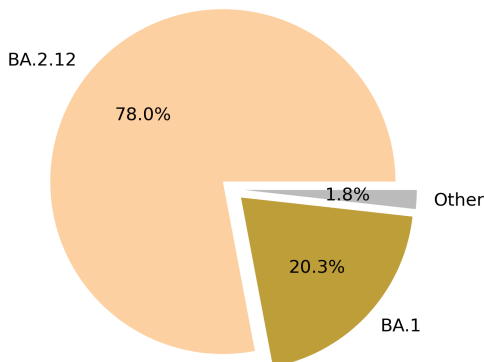

Abundance of variants by Freyja

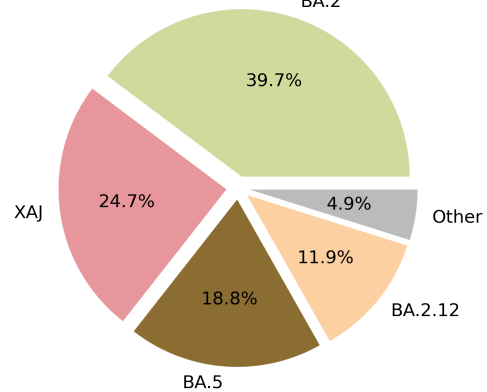

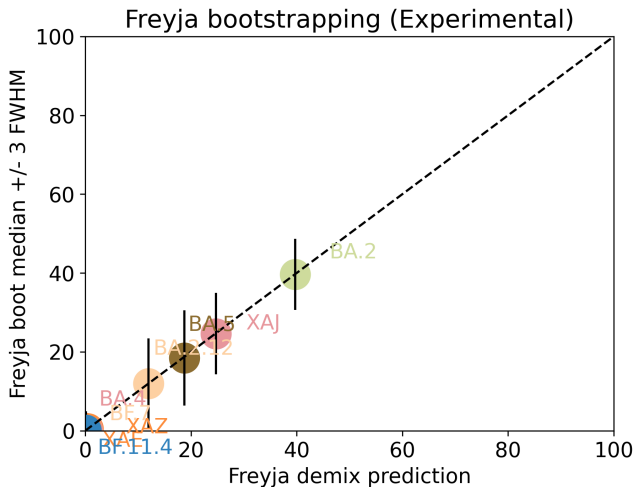

Under the assumption that the presence of a variant requires the detection of all respective mutations of the variant, the characteristic mutations which support the presence of the respective variant are indicated in the respective column of the table. Numbers show the number of mutations detected, if any, and the number of mutations expected to be present based on the variant definitions.

| VOC                               | <a href="#">B.1.617.2</a>                  | <a href="#">BA.1</a>                                                         | <a href="#">BA.2</a>                                                                                                                                                                                                                                                                                                            | <a href="#">BA.3</a>                                                                                                                                                 | <a href="#">BA.4</a>                                                                                                                                                                                                                                                                           | <a href="#">BA.5</a>                                                                                                                                                                                                                                             |
|-----------------------------------|--------------------------------------------|------------------------------------------------------------------------------|---------------------------------------------------------------------------------------------------------------------------------------------------------------------------------------------------------------------------------------------------------------------------------------------------------------------------------|----------------------------------------------------------------------------------------------------------------------------------------------------------------------|------------------------------------------------------------------------------------------------------------------------------------------------------------------------------------------------------------------------------------------------------------------------------------------------|------------------------------------------------------------------------------------------------------------------------------------------------------------------------------------------------------------------------------------------------------------------|
| Characteristic mutations detected | (3 of 13)<br>S:G142D<br>S:L452R<br>S:T478K | (5 of 26)<br>M:D3G<br>NUC:C25000T<br>NUC:C25584T<br>ORF1AB:I3758V<br>S:Q493R | (22 of 31)<br>N:S413R<br>NUC:A9424G<br>NUC:C10198T<br>NUC:C12880T<br>NUC:C15714T<br>NUC:C25000T<br>NUC:C25584T<br>NUC:C26858T<br>NUC:C4321T<br>NUC:G10447A<br>ORF1AB:G1307S<br>ORF1AB:L3027F<br>ORF1AB:L3201F<br>ORF1AB:S135R<br>ORF1AB:T3090I<br>ORF1AB:T842I<br>S:D405N<br>S:Q493R<br>S:R408S<br>S:S371F<br>S:T19I<br>S:T376A | (11 of 21)<br>N:S413R<br>NUC:C12880T<br>NUC:C15714T<br>NUC:C26858T<br>NUC:G10447A<br>ORF1AB:G1307S<br>ORF1AB:S135R<br>ORF1AB:T3090I<br>S:D405N<br>S:Q493R<br>S:S371F | (20 of 31)<br>N:S413R<br>NUC:C10198T<br>NUC:C12880T<br>NUC:C15714T<br>NUC:C25000T<br>NUC:C25584T<br>NUC:C26858T<br>NUC:C4321T<br>NUC:G10447A<br>NUC:G27788T<br>ORF1AB:G1307S<br>ORF1AB:S135R<br>ORF1AB:T3090I<br>ORF1AB:T842I<br>S:D405N<br>S:F486V<br>S:L452R<br>S:S371F<br>S:T19I<br>S:T376A | (18 of 28)<br>N:S413R<br>NUC:C10198T<br>NUC:C12880T<br>NUC:C15714T<br>NUC:C25000T<br>NUC:C25584T<br>NUC:C4321T<br>NUC:G10447A<br>ORF1AB:G1307S<br>ORF1AB:S135R<br>ORF1AB:T3090I<br>ORF1AB:T842I<br>S:D405N<br>S:F486V<br>S:L452R<br>S:S371F<br>S:T19I<br>S:T376A |

**Jaccard Index** is a measure of similarity between two sets A and B, reaching the maximum value of 1 if A=B and minimum value of 0 if  $A \cap B = \{\}$ . In the c(d) representation below, c represents the Jaccard index of the set of mutations that were experimentally detected for this sample as listed above, whereas d refers to the ideal value of the Jaccard index expected from complete genome coverage without any sequencing errors.

|                           | <a href="#">B.1.617.2</a>     | <a href="#">BA.1</a>          | <a href="#">BA.2</a>          | <a href="#">BA.3</a>          | <a href="#">BA.4</a>          | <a href="#">BA.5</a>          |
|---------------------------|-------------------------------|-------------------------------|-------------------------------|-------------------------------|-------------------------------|-------------------------------|
| <a href="#">B.1.617.2</a> | 1.00 ( <a href="#">1.00</a> ) | 0.00 ( <a href="#">0.00</a> ) | 0.00 ( <a href="#">0.00</a> ) | 0.00 ( <a href="#">0.00</a> ) | 0.05 ( <a href="#">0.02</a> ) | 0.05 ( <a href="#">0.03</a> ) |
| <a href="#">BA.1</a>      | 0.00 ( <a href="#">0.00</a> ) | 1.00 ( <a href="#">1.00</a> ) | 0.12 ( <a href="#">0.10</a> ) | 0.07 ( <a href="#">0.21</a> ) | 0.09 ( <a href="#">0.08</a> ) | 0.10 ( <a href="#">0.08</a> ) |
| <a href="#">BA.2</a>      | 0.00 ( <a href="#">0.00</a> ) | 0.12 ( <a href="#">0.10</a> ) | 1.00 ( <a href="#">1.00</a> ) | 0.50 ( <a href="#">0.33</a> ) | 0.68 ( <a href="#">0.63</a> ) | 0.67 ( <a href="#">0.59</a> ) |
| <a href="#">BA.3</a>      | 0.00 ( <a href="#">0.00</a> ) | 0.07 ( <a href="#">0.21</a> ) | 0.50 ( <a href="#">0.33</a> ) | 1.00 ( <a href="#">1.00</a> ) | 0.48 ( <a href="#">0.30</a> ) | 0.45 ( <a href="#">0.29</a> ) |
| <a href="#">BA.4</a>      | 0.05 ( <a href="#">0.02</a> ) | 0.09 ( <a href="#">0.08</a> ) | 0.68 ( <a href="#">0.63</a> ) | 0.48 ( <a href="#">0.30</a> ) | 1.00 ( <a href="#">1.00</a> ) | 0.90 ( <a href="#">0.84</a> ) |

BA.5

0.05 ([0.03](#))

0.10 ([0.08](#))

0.67 ([0.59](#))

0.45 ([0.29](#))

0.90 ([0.84](#))

1.00 ([1.00](#))

## Detected mutations

Excluded from this pdf version due to file size limitations.

**CFSAN/OAO**  
**BIostatistics AND Bioinformatics Staff**

# WASTEWATER SARS-COV2 ANALYSIS REPORT

|                                  |                                                                                                              |
|----------------------------------|--------------------------------------------------------------------------------------------------------------|
| Sample name:                     | CFSANSMP000119223                                                                                            |
| Date generated:                  | 2023-02-02, 09:14:44 EST                                                                                     |
| Timestamp of C-WAP version used: | Tue Jan 31 11:49:22 2023 -0500                                                                               |
| Executed by:                     | Jasmine Amirzadegan ( <a href="mailto:Jasmine.Amirzadegan@fda.hhs.gov">Jasmine.Amirzadegan@fda.hhs.gov</a> ) |
| Executed on:                     | 172.20.44.125 (aka n125.raven.cfsan)                                                                         |

## Sequencing summary

|                                      |                               |
|--------------------------------------|-------------------------------|
| Sequencing chemistry:                | Missing with Missing          |
| Source site:                         | <a href="#">Missing (?.?)</a> |
| Sampling date:                       | Missing                       |
| Collected by:                        | Missing                       |
| Sequenced by:                        | Missing                       |
| Total number of reads:               | 487373                        |
| Reads aligned:                       | 387337 (79%)                  |
| Average read quality:                | 19.8                          |
| Average read length:                 | 668                           |
| Reads passing filter:                | 387336 (79%)                  |
| Average read quality passing filter: | 19.8                          |
| Average read length passing filter:  | 668                           |
| Average coverage passing filter:     | 8652X                         |

A read passes filter if the read length after adaptor trimming  $\geq 30$  and minimum read quality  $\geq 20$  within a sliding window of width 4.

## Overall sequence characteristics



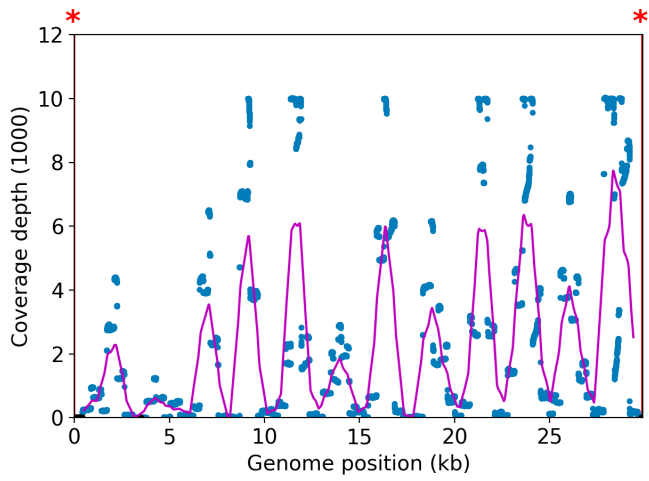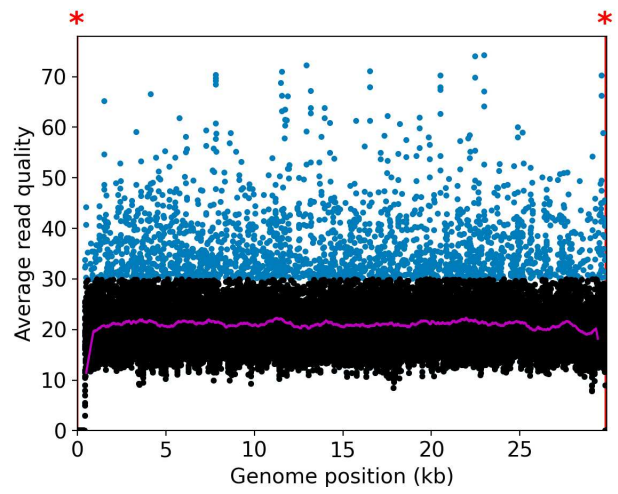

NOTE: The red shaded areas marked with a (\*) are not covered by the design of the library preparation kit and hence excluded from analyses. Magenta curves represent moving average with a window width of 1kb.

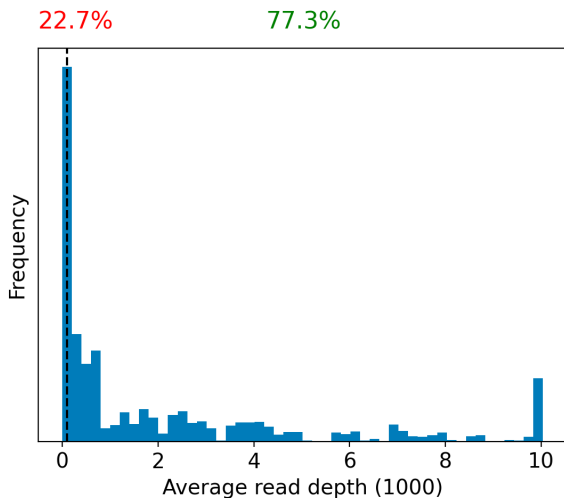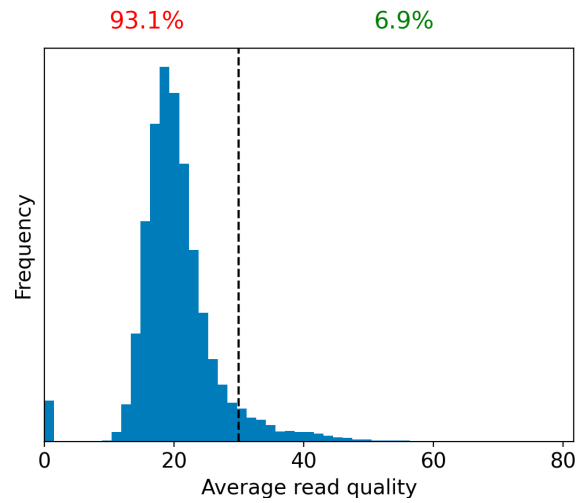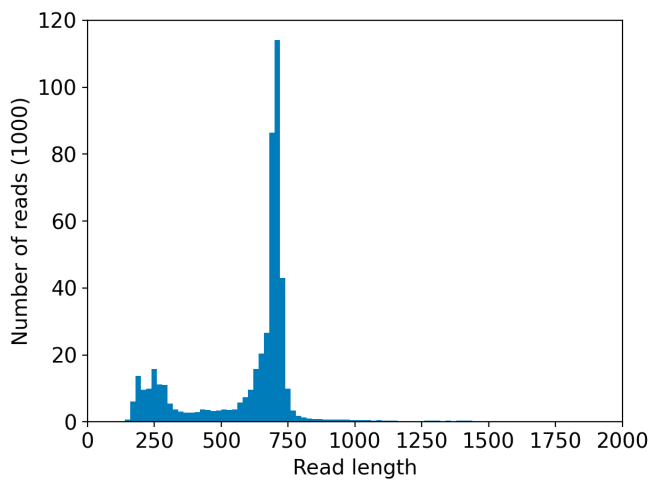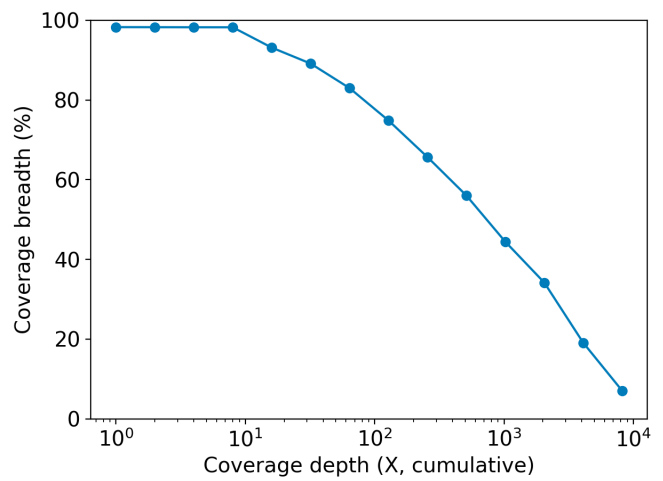

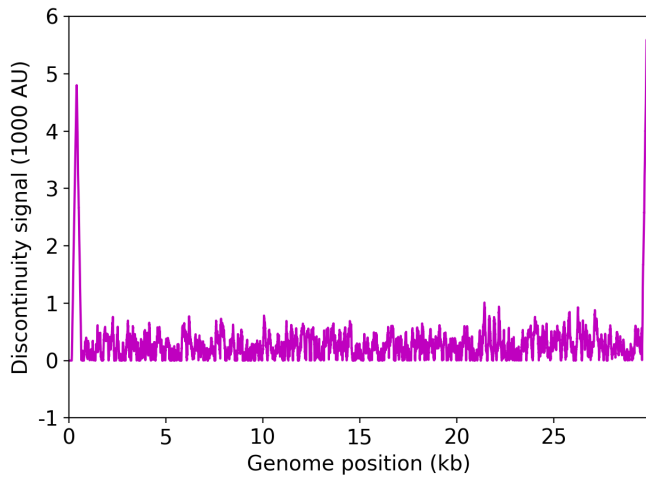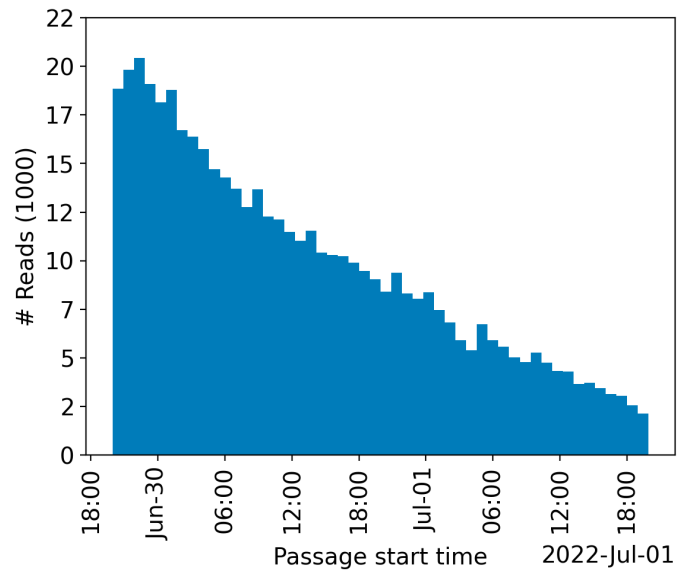

|                                                   | Uncovered coordinates (0X) | Poorly covered coordinates (<10X) |
|---------------------------------------------------|----------------------------|-----------------------------------|
| # Inaccessible genomic coordinates by kit design: | 152nt (0%)                 | 152nt (0%)                        |
| All genomic coordinates:                          | 509nt (1%)                 | 548nt (1%)                        |
| Common SNPs:                                      | 1nt (2%)                   | 1nt (2%)                          |
| Diverse SNPs:                                     | 29nt (12%)                 | 29nt (12%)                        |
| Rare SNPs:                                        | 66nt (7%)                  | 66nt (7%)                         |

SNPs refer to the polymorphic sites currently in circulation that were detected out of recent GISAID entries. The sites that differ from the SC2 reference sequence are denoted as "common" if [90%, 100%] of the submissions carry this mutation, whereas those that are prevalent in [0%,10%] of the submissions are grouped under the "rare" category. The population is still diverse at the mutation sites that are observed in (10%,90%) of the entries and these coordinates are grouped under the "diverse" category.

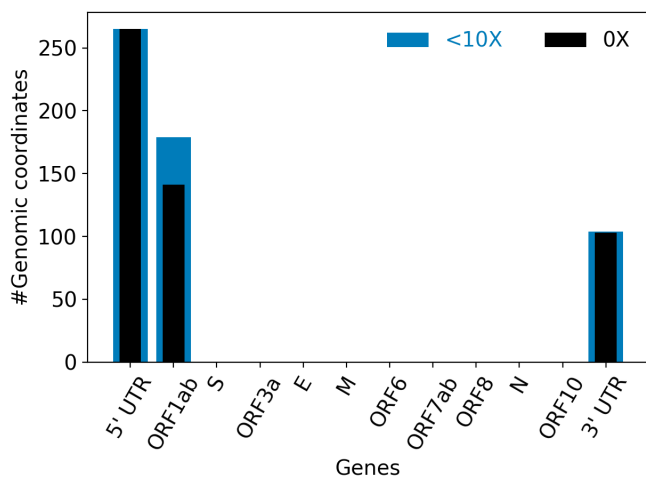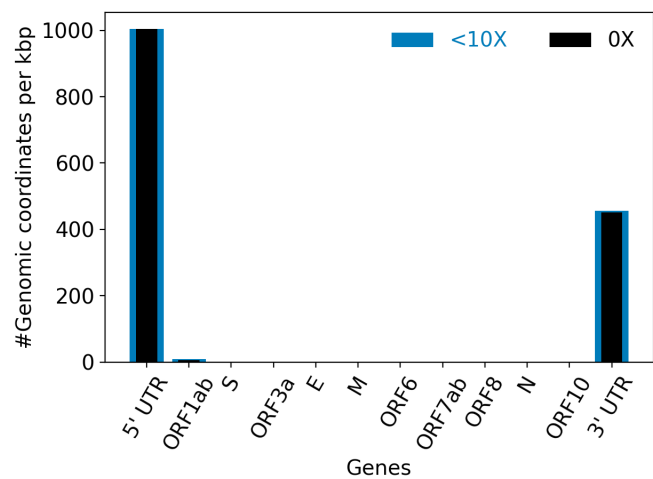

|                                                     |                        |
|-----------------------------------------------------|------------------------|
| Hits to SARS-Cov2 genome (kraken2):                 | 382881 reads (78.56%)  |
| Hits to human genome (kraken2):                     | 4425 reads (0.91%)     |
| Hits to synthetic sequences (kraken2, taxid 28384): | 0 reads (0.00%)        |
|                                                     | Coronaviridae (78.56%) |

Most abundant organisms (kraken2, family level):

Arcobacteraceae (3.00%)  
Hominidae (0.91%)  
Bacteroidaceae (0.44%)  
Enterobacteriaceae (0.40%)

## Detected variants (Experimental)

Abundance of variants  
by linear regression  
Omicron

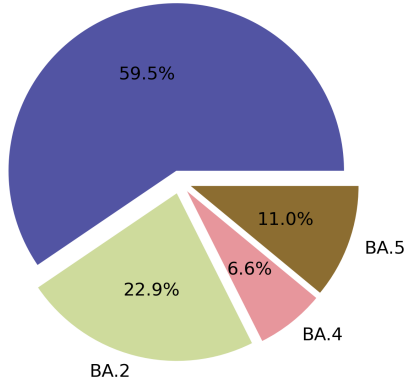

Abundance of variants by kallisto

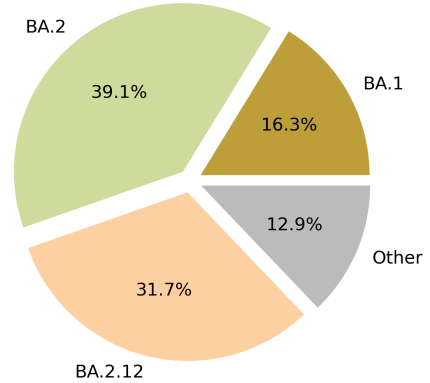

Based on deconvolution, [B.1.1.529](#) is estimated to constitute 59.47% of the viral particles and hence is the most abundant variant in the sample. The  $R^2$  for the linear regression was 0.62. Variants that were detected less than 5% were grouped under "Other"

Based on the consensus sequence of the observed reads, the "ensemble-averaged sequence" most closely resembles the [BA.2](#) lineage. If this is a sample consisting of a single source of pathogens or an overwhelming majority of the different sources are infected with the same variant, the sample is dominated by this variant.

Based on mapping individual reads to the variant consensus sequences in the reference database, kallisto predicts that the sample is dominated by [BA.2](#) lineage. Accuracy of this measure is expected to improve if the input data consists of long reads as opposed to convolution.

Abundance of variants by  
kraken2+bracken, using majorCovid DB

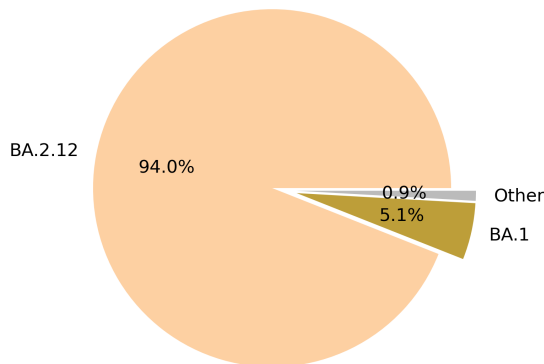

Abundance of variants by Freyja  
BA.5

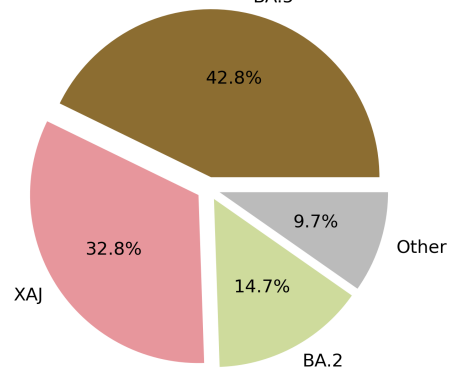

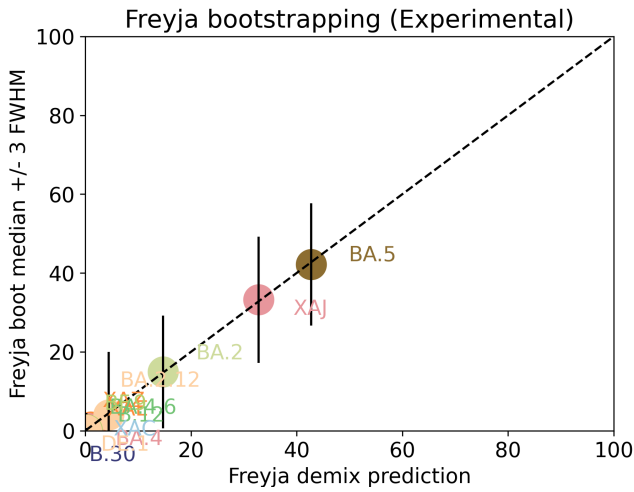

Under the assumption that the presence of a variant requires the detection of all respective mutations of the variant, the characteristic mutations which support the presence of the respective variant are indicated in the respective column of the table. Numbers show the number of mutations detected, if any, and the number of mutations expected to be present based on the variant definitions.

| VOC                               | <a href="#">B.1.617.2</a>                  | <a href="#">BA.1</a>                                                         | <a href="#">BA.2</a>                                                                                                                                                                                                                                                                                                                           | <a href="#">BA.3</a>                                                                                                                                                 | <a href="#">BA.4</a>                                                                                                                                                                                                                                                                                                     | <a href="#">BA.5</a>                                                                                                                                                                                                                                                                                |
|-----------------------------------|--------------------------------------------|------------------------------------------------------------------------------|------------------------------------------------------------------------------------------------------------------------------------------------------------------------------------------------------------------------------------------------------------------------------------------------------------------------------------------------|----------------------------------------------------------------------------------------------------------------------------------------------------------------------|--------------------------------------------------------------------------------------------------------------------------------------------------------------------------------------------------------------------------------------------------------------------------------------------------------------------------|-----------------------------------------------------------------------------------------------------------------------------------------------------------------------------------------------------------------------------------------------------------------------------------------------------|
| Characteristic mutations detected | (3 of 13)<br>S:G142D<br>S:L452R<br>S:T478K | (5 of 26)<br>M:D3G<br>NUC:C25000T<br>NUC:C25584T<br>ORF1AB:I3758V<br>S:Q493R | (23 of 31)<br>N:S413R<br>NUC:A20055G<br>NUC:A9424G<br>NUC:C10198T<br>NUC:C12880T<br>NUC:C15714T<br>NUC:C25000T<br>NUC:C25584T<br>NUC:C26858T<br>NUC:C4321T<br>NUC:G10447A<br>ORF1AB:G1307S<br>ORF1AB:L3027F<br>ORF1AB:L3201F<br>ORF1AB:S135R<br>ORF1AB:T3090I<br>ORF1AB:T842I<br>S:D405N<br>S:Q493R<br>S:R408S<br>S:S371F<br>S:T19I<br>S:T376A | (11 of 21)<br>N:S413R<br>NUC:C12880T<br>NUC:C15714T<br>NUC:C26858T<br>NUC:G10447A<br>ORF1AB:G1307S<br>ORF1AB:S135R<br>ORF1AB:T3090I<br>S:D405N<br>S:Q493R<br>S:S371F | (22 of 31)<br>N:S413R<br>NUC:A20055G<br>NUC:C10198T<br>NUC:C12880T<br>NUC:C15714T<br>NUC:C25000T<br>NUC:C25584T<br>NUC:C26858T<br>NUC:C4321T<br>NUC:G10447A<br>NUC:G27788T<br>ORF1AB:G1307S<br>ORF1AB:S135R<br>ORF1AB:T3090I<br>ORF1AB:T842I<br>S:D405N<br>S:F486V<br>S:L452R<br>S:S371F<br>S:T19I<br>S:T376A<br>S:V213G | (21 of 28)<br>M:D3N<br>N:S413R<br>NUC:A20055G<br>NUC:C10198T<br>NUC:C12880T<br>NUC:C15714T<br>NUC:C25000T<br>NUC:C25584T<br>NUC:C4321T<br>NUC:G10447A<br>ORF1AB:G1307S<br>ORF1AB:S135R<br>ORF1AB:T3090I<br>ORF1AB:T842I<br>S:D405N<br>S:F486V<br>S:L452R<br>S:S371F<br>S:T19I<br>S:T376A<br>S:V213G |

[Jaccard Index](#) is a measure of similarity between two sets A and B, reaching the maximum value of 1 if A=B and minimum value of 0 if  $A \cap B = \{\}$ . In the c(d) representation below, c represents the Jaccard index of the set of mutations that were experimentally detected for this sample as listed above, whereas d refers to the ideal value of the Jaccard index expected from complete genome coverage without any sequencing errors.

|                           | <a href="#">B.1.617.2</a>     | <a href="#">BA.1</a>          | <a href="#">BA.2</a>          | <a href="#">BA.3</a>          | <a href="#">BA.4</a>          | <a href="#">BA.5</a>          |
|---------------------------|-------------------------------|-------------------------------|-------------------------------|-------------------------------|-------------------------------|-------------------------------|
| <a href="#">B.1.617.2</a> | 1.00 ( <a href="#">1.00</a> ) | 0.00 ( <a href="#">0.00</a> ) | 0.00 ( <a href="#">0.00</a> ) | 0.00 ( <a href="#">0.00</a> ) | 0.04 ( <a href="#">0.02</a> ) | 0.04 ( <a href="#">0.03</a> ) |
| <a href="#">BA.1</a>      | 0.00 ( <a href="#">0.00</a> ) | 1.00 ( <a href="#">1.00</a> ) | 0.12 ( <a href="#">0.10</a> ) | 0.07 ( <a href="#">0.21</a> ) | 0.08 ( <a href="#">0.08</a> ) | 0.08 ( <a href="#">0.08</a> ) |
| <a href="#">BA.2</a>      | 0.00 ( <a href="#">0.00</a> ) | 0.12 ( <a href="#">0.10</a> ) | 1.00 ( <a href="#">1.00</a> ) | 0.48 ( <a href="#">0.33</a> ) | 0.67 ( <a href="#">0.63</a> ) | 0.63 ( <a href="#">0.59</a> ) |
| <a href="#">BA.3</a>      | 0.00 ( <a href="#">0.00</a> ) | 0.07 ( <a href="#">0.21</a> ) | 0.48 ( <a href="#">0.33</a> ) | 1.00 ( <a href="#">1.00</a> ) | 0.43 ( <a href="#">0.30</a> ) | 0.39 ( <a href="#">0.29</a> ) |
| <a href="#">BA.4</a>      | 0.04 ( <a href="#">0.02</a> ) | 0.08 ( <a href="#">0.08</a> ) | 0.67 ( <a href="#">0.63</a> ) | 0.43 ( <a href="#">0.30</a> ) | 1.00 ( <a href="#">1.00</a> ) | 0.87 ( <a href="#">0.84</a> ) |

BA.5

0.04 ([0.03](#))

0.08 ([0.08](#))

0.63 ([0.59](#))

0.39 ([0.29](#))

0.87 ([0.84](#))

1.00 ([1.00](#))

## Detected mutations

Excluded from this pdf version due to file size limitations.

**CFSAN/OAO**  
**BIostatistics AND BIOinformatics STAFF**

# WASTEWATER SARS-COV2 ANALYSIS REPORT

|                                  |                                                                                                              |
|----------------------------------|--------------------------------------------------------------------------------------------------------------|
| Sample name:                     | CFSANSMP000119224                                                                                            |
| Date generated:                  | 2023-02-02, 09:09:31 EST                                                                                     |
| Timestamp of C-WAP version used: | Tue Jan 31 11:49:22 2023 -0500                                                                               |
| Executed by:                     | Jasmine Amirzadegan ( <a href="mailto:Jasmine.Amirzadegan@fda.hhs.gov">Jasmine.Amirzadegan@fda.hhs.gov</a> ) |
| Executed on:                     | 172.20.44.125 (aka n125.raven.cfsan)                                                                         |

## Sequencing summary

|                                      |                               |
|--------------------------------------|-------------------------------|
| Sequencing chemistry:                | Missing with Missing          |
| Source site:                         | <a href="#">Missing (?.?)</a> |
| Sampling date:                       | Missing                       |
| Collected by:                        | Missing                       |
| Sequenced by:                        | Missing                       |
| Total number of reads:               | 1115551                       |
| Reads aligned:                       | 990608 (88%)                  |
| Average read quality:                | 19.8                          |
| Average read length:                 | 696                           |
| Reads passing filter:                | 990602 (88%)                  |
| Average read quality passing filter: | 19.8                          |
| Average read length passing filter:  | 696                           |
| Average coverage passing filter:     | 23056X                        |

A read passes filter if the read length after adaptor trimming  $\geq 30$  and minimum read quality  $\geq 20$  within a sliding window of width 4.

## Overall sequence characteristics

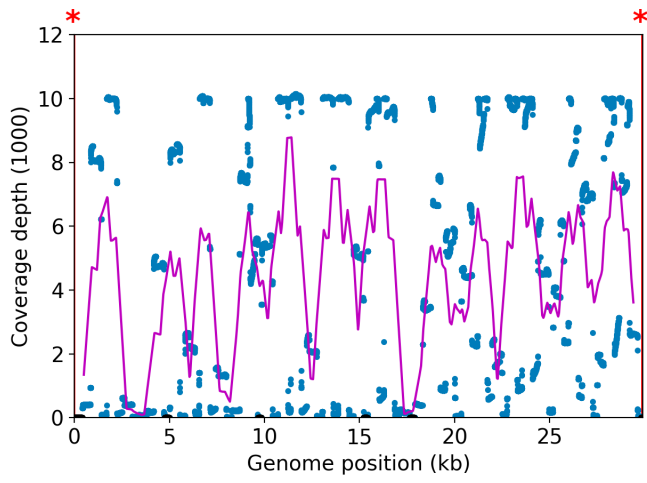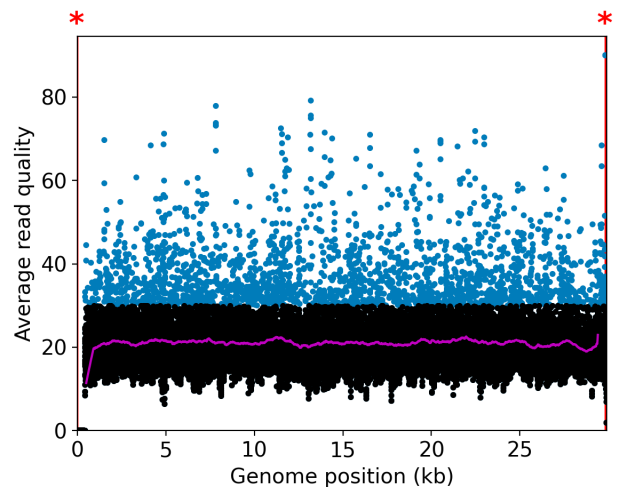

NOTE: The red shaded areas marked with a (\*) are not covered by the design of the library preparation kit and hence excluded from analyses. Magenta curves represent moving average with a window width of 1kb.

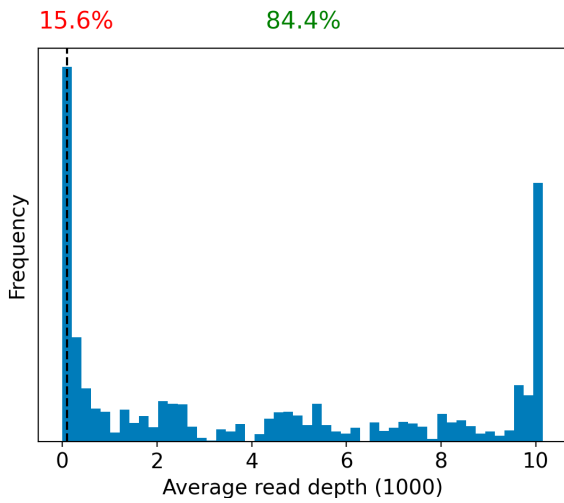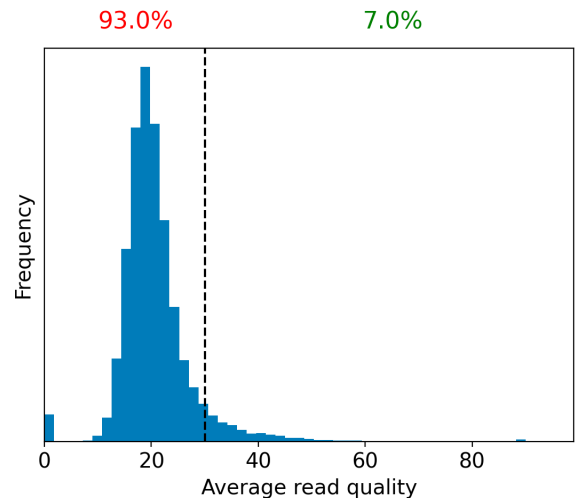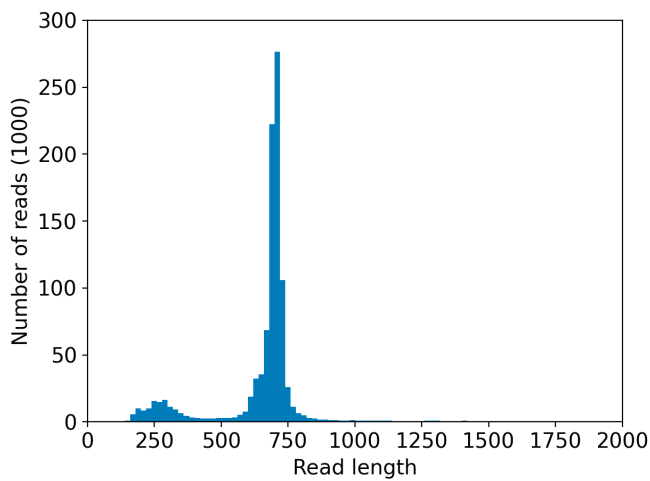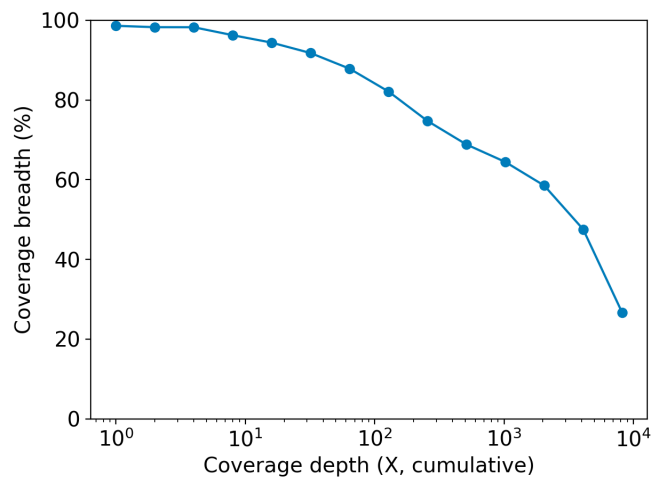

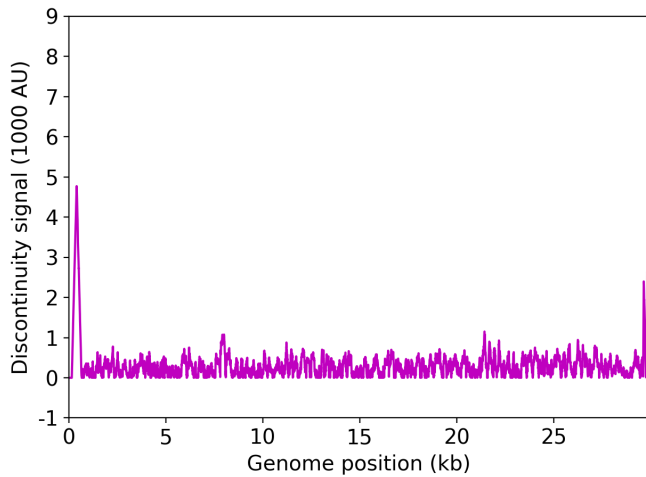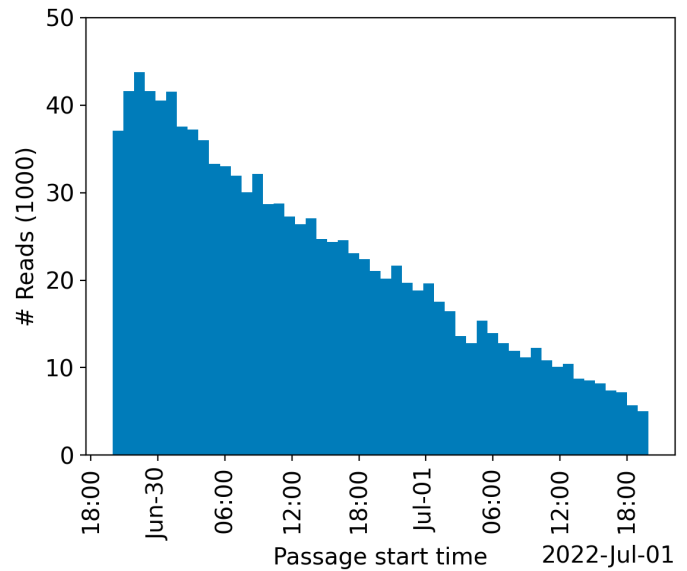

|                                                   | Uncovered coordinates (0X) | Poorly covered coordinates (<10X) |
|---------------------------------------------------|----------------------------|-----------------------------------|
| # Inaccessible genomic coordinates by kit design: | 152nt (0%)                 | 152nt (0%)                        |
| All genomic coordinates:                          | 410nt (1%)                 | 1350nt (4%)                       |
| Common SNPs:                                      | 1nt (2%)                   | 1nt (2%)                          |
| Diverse SNPs:                                     | 2nt (0%)                   | 30nt (13%)                        |
| Rare SNPs:                                        | 49nt (5%)                  | 66nt (7%)                         |

SNPs refer to the polymorphic sites currently in circulation that were detected out of recent GISAID entries. The sites that differ from the SC2 reference sequence are denoted as "common" if [90%, 100%] of the submissions carry this mutation, whereas those that are prevalent in [0%,10%] of the submissions are grouped under the "rare" category. The population is still diverse at the mutation sites that are observed in (10%,90%) of the entries and these coordinates are grouped under the "diverse" category.

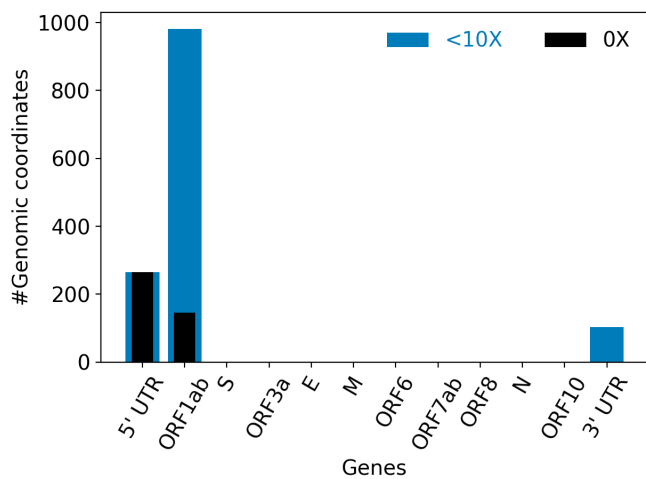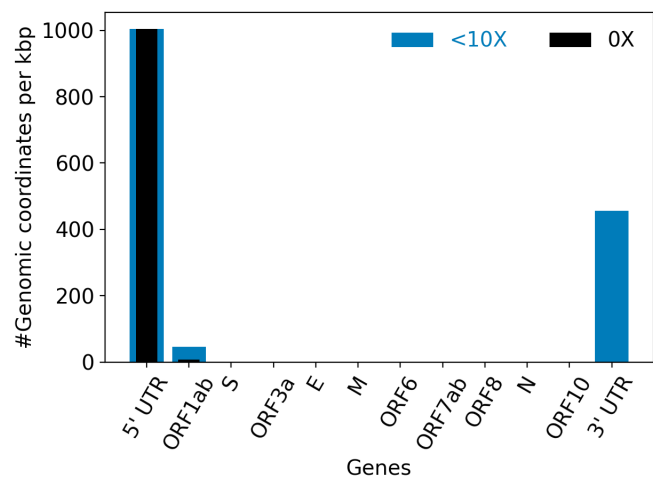

|                                                     |                        |
|-----------------------------------------------------|------------------------|
| Hits to SARS-Cov2 genome (kraken2):                 | 982438 reads (88.07%)  |
| Hits to human genome (kraken2):                     | 6838 reads (0.61%)     |
| Hits to synthetic sequences (kraken2, taxid 28384): | 0 reads (0.00%)        |
|                                                     | Coronaviridae (88.07%) |



Most abundant organisms (kraken2, family level):

Arcobacteraceae (0.96%)  
Hominidae (0.61%)  
Enterobacteriaceae (0.16%)  
Bacteroidaceae (0.12%)

## Detected variants (Experimental)

Abundance of variants by linear regression  
Omicron

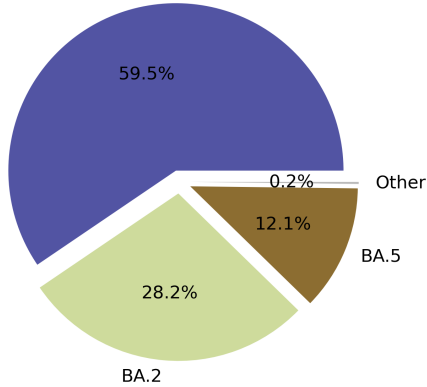

Abundance of variants by kallisto  
BA.2

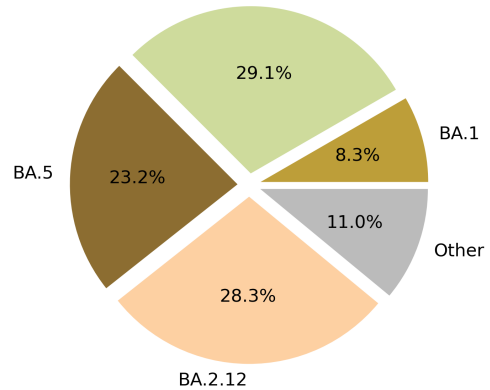

Based on deconvolution, [B.1.1.529](#) is estimated to constitute 59.47% of the viral particles and hence is the most abundant variant in the sample. The  $R^2$  for the linear regression was 0.63. Variants that were detected less than 5% were grouped under "Other"

Based on the consensus sequence of the observed reads, the "ensemble-averaged sequence" most closely resembles the [BA.2](#) lineage. If this is a sample consisting of a single source of pathogens or an overwhelming majority of the different sources are infected with the same variant, the sample is dominated by this variant.

Based on mapping individual reads to the variant consensus sequences in the reference database, kallisto predicts that the sample is dominated by [BA.2](#) lineage. Accuracy of this measure is expected to improve if the input data consists of long reads as opposed to convolution.

Abundance of variants by kraken2+bracken, using majorCovid DB

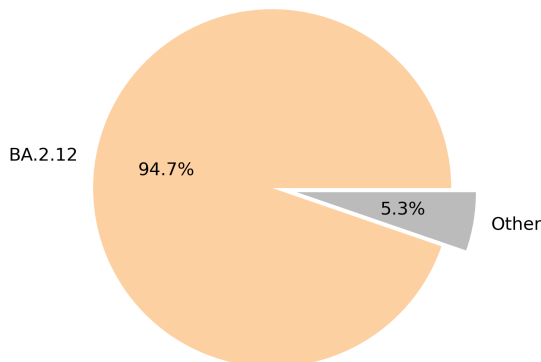

Abundance of variants by Freyja  
BA.5

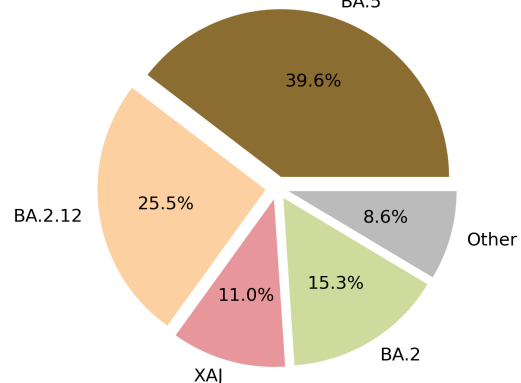

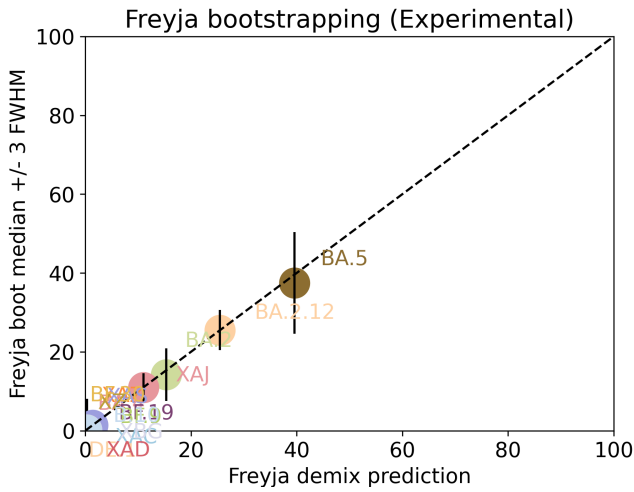

Under the assumption that the presence of a variant requires the detection of all respective mutations of the variant, the characteristic mutations which support the presence of the respective variant are indicated in the respective column of the table. Numbers show the number of mutations detected, if any, and the number of mutations expected to be present based on the variant definitions.

| VOC                               | <a href="#">B.1.617.2</a>                  | <a href="#">BA.1</a>                                                                    | <a href="#">BA.2</a>                                                                                                                                                                                                                                                                                                                           | <a href="#">BA.3</a>                                                                                                                                                 | <a href="#">BA.4</a>                                                                                                                                                                                                                                                                                                     | <a href="#">BA.5</a>                                                                                                                                                                                                                                                                       |
|-----------------------------------|--------------------------------------------|-----------------------------------------------------------------------------------------|------------------------------------------------------------------------------------------------------------------------------------------------------------------------------------------------------------------------------------------------------------------------------------------------------------------------------------------------|----------------------------------------------------------------------------------------------------------------------------------------------------------------------|--------------------------------------------------------------------------------------------------------------------------------------------------------------------------------------------------------------------------------------------------------------------------------------------------------------------------|--------------------------------------------------------------------------------------------------------------------------------------------------------------------------------------------------------------------------------------------------------------------------------------------|
| Characteristic mutations detected | (3 of 13)<br>S:G142D<br>S:L452R<br>S:T478K | (6 of 26)<br>M:D3G<br>NUC:C25000T<br>NUC:C25584T<br>ORF1AB:I3758V<br>S:N856K<br>S:Q493R | (23 of 31)<br>N:S413R<br>NUC:A20055G<br>NUC:A9424G<br>NUC:C10198T<br>NUC:C12880T<br>NUC:C15714T<br>NUC:C25000T<br>NUC:C25584T<br>NUC:C26858T<br>NUC:C4321T<br>NUC:G10447A<br>ORF1AB:G1307S<br>ORF1AB:L3027F<br>ORF1AB:L3201F<br>ORF1AB:S135R<br>ORF1AB:T3090I<br>ORF1AB:T842I<br>S:D405N<br>S:Q493R<br>S:S371F<br>S:R408S<br>S:T19I<br>S:T376A | (11 of 21)<br>N:S413R<br>NUC:C12880T<br>NUC:C15714T<br>NUC:C26858T<br>NUC:G10447A<br>ORF1AB:G1307S<br>ORF1AB:S135R<br>ORF1AB:T3090I<br>S:D405N<br>S:Q493R<br>S:S371F | (22 of 31)<br>N:S413R<br>NUC:A20055G<br>NUC:C10198T<br>NUC:C12880T<br>NUC:C15714T<br>NUC:C25000T<br>NUC:C25584T<br>NUC:C26858T<br>NUC:C4321T<br>NUC:G10447A<br>NUC:G27788T<br>ORF1AB:G1307S<br>ORF1AB:S135R<br>ORF1AB:T3090I<br>ORF1AB:T842I<br>S:D405N<br>S:F486V<br>S:L452R<br>S:S371F<br>S:T19I<br>S:T376A<br>S:V213G | (20 of 28)<br>N:S413R<br>NUC:A20055G<br>NUC:C10198T<br>NUC:C12880T<br>NUC:C15714T<br>NUC:C25000T<br>NUC:C25584T<br>NUC:C4321T<br>NUC:G10447A<br>ORF1AB:G1307S<br>ORF1AB:S135R<br>ORF1AB:T3090I<br>ORF1AB:T842I<br>S:D405N<br>S:F486V<br>S:L452R<br>S:S371F<br>S:T19I<br>S:T376A<br>S:V213G |

[Jaccard Index](#) is a measure of similarity between two sets A and B, reaching the maximum value of 1 if A=B and minimum value of 0 if  $A \cap B = \{\}$ . In the c(d) representation below, c represents the Jaccard index of the set of mutations that were experimentally detected for this sample as listed above, whereas d refers to the ideal value of the Jaccard index expected from complete genome coverage without any sequencing errors.

|                           | <a href="#">B.1.617.2</a>     | <a href="#">BA.1</a>          | <a href="#">BA.2</a>          | <a href="#">BA.3</a>          | <a href="#">BA.4</a>          | <a href="#">BA.5</a>          |
|---------------------------|-------------------------------|-------------------------------|-------------------------------|-------------------------------|-------------------------------|-------------------------------|
| <a href="#">B.1.617.2</a> | 1.00 ( <a href="#">1.00</a> ) | 0.00 ( <a href="#">0.00</a> ) | 0.00 ( <a href="#">0.00</a> ) | 0.00 ( <a href="#">0.00</a> ) | 0.04 ( <a href="#">0.02</a> ) | 0.05 ( <a href="#">0.03</a> ) |
| <a href="#">BA.1</a>      | 0.00 ( <a href="#">0.00</a> ) | 1.00 ( <a href="#">1.00</a> ) | 0.12 ( <a href="#">0.10</a> ) | 0.06 ( <a href="#">0.21</a> ) | 0.08 ( <a href="#">0.08</a> ) | 0.08 ( <a href="#">0.08</a> ) |
| <a href="#">BA.2</a>      | 0.00 ( <a href="#">0.00</a> ) | 0.12 ( <a href="#">0.10</a> ) | 1.00 ( <a href="#">1.00</a> ) | 0.48 ( <a href="#">0.33</a> ) | 0.67 ( <a href="#">0.63</a> ) | 0.65 ( <a href="#">0.59</a> ) |
| <a href="#">BA.3</a>      | 0.00 ( <a href="#">0.00</a> ) | 0.06 ( <a href="#">0.21</a> ) | 0.48 ( <a href="#">0.33</a> ) | 1.00 ( <a href="#">1.00</a> ) | 0.43 ( <a href="#">0.30</a> ) | 0.41 ( <a href="#">0.29</a> ) |
| <a href="#">BA.4</a>      | 0.04 ( <a href="#">0.02</a> ) | 0.08 ( <a href="#">0.08</a> ) | 0.67 ( <a href="#">0.63</a> ) | 0.43 ( <a href="#">0.30</a> ) | 1.00 ( <a href="#">1.00</a> ) | 0.91 ( <a href="#">0.84</a> ) |

BA.5

0.05 ([0.03](#))

0.08 ([0.08](#))

0.65 ([0.59](#))

0.41 ([0.29](#))

0.91 ([0.84](#))

1.00 ([1.00](#))

## Detected mutations

Excluded from this pdf version due to file size limitations.

**CFSAN/OAO**  
**BIostatistics AND BIOinformatics STAFF**

# WASTEWATER SARS-COV2 ANALYSIS REPORT

|                                  |                                                                                                              |
|----------------------------------|--------------------------------------------------------------------------------------------------------------|
| Sample name:                     | CFSANSMP000119225                                                                                            |
| Date generated:                  | 2023-02-02, 09:10:20 EST                                                                                     |
| Timestamp of C-WAP version used: | Tue Jan 31 11:49:22 2023 -0500                                                                               |
| Executed by:                     | Jasmine Amirzadegan ( <a href="mailto:Jasmine.Amirzadegan@fda.hhs.gov">Jasmine.Amirzadegan@fda.hhs.gov</a> ) |
| Executed on:                     | 172.20.44.125 (aka n125.raven.cfsan)                                                                         |

## Sequencing summary

| Sequencing chemistry:                | Missing with Missing          |
|--------------------------------------|-------------------------------|
| Source site:                         | <a href="#">Missing (?.?)</a> |
| Sampling date:                       | Missing                       |
| Collected by:                        | Missing                       |
| Sequenced by:                        | Missing                       |
| Total number of reads:               | 561738                        |
| Reads aligned:                       | 448062 (79%)                  |
| Average read quality:                | 19.7                          |
| Average read length:                 | 674                           |
| Reads passing filter:                | 448028 (79%)                  |
| Average read quality passing filter: | 19.7                          |
| Average read length passing filter:  | 674                           |
| Average coverage passing filter:     | 10098X                        |

A read passes filter if the read length after adaptor trimming  $\geq 30$  and minimum read quality  $\geq 20$  within a sliding window of width 4.

## Overall sequence characteristics

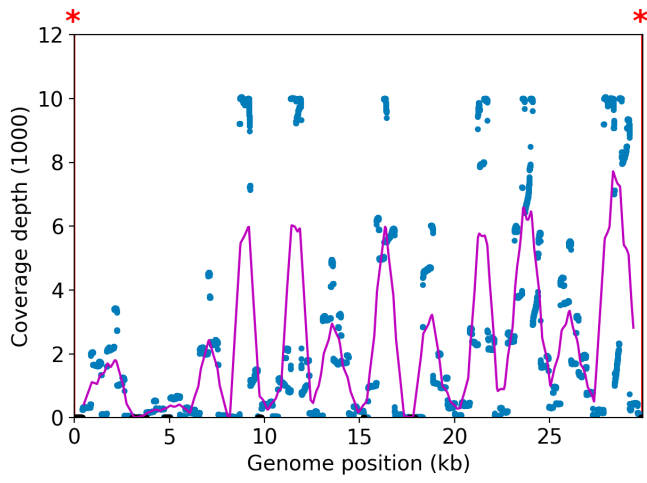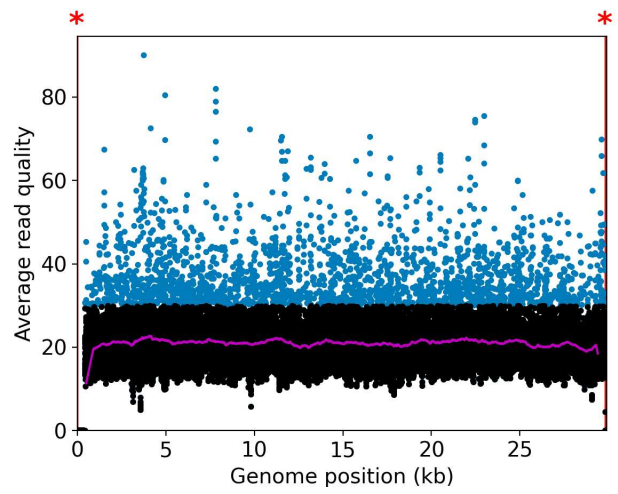

NOTE: The red shaded areas marked with a (\*) are not covered by the design of the library preparation kit and hence excluded from analyses. Magenta curves represent moving average with a window width of 1kb.

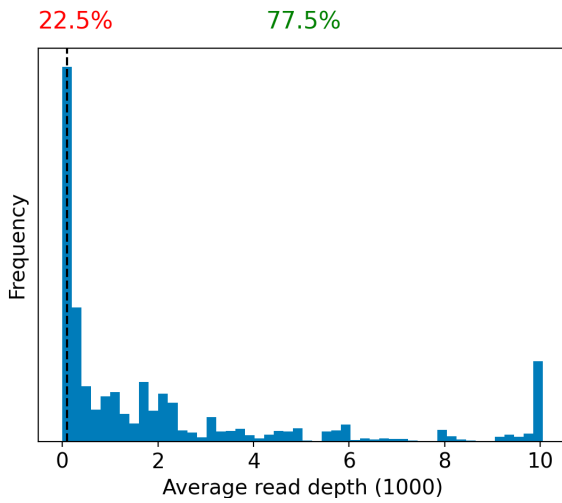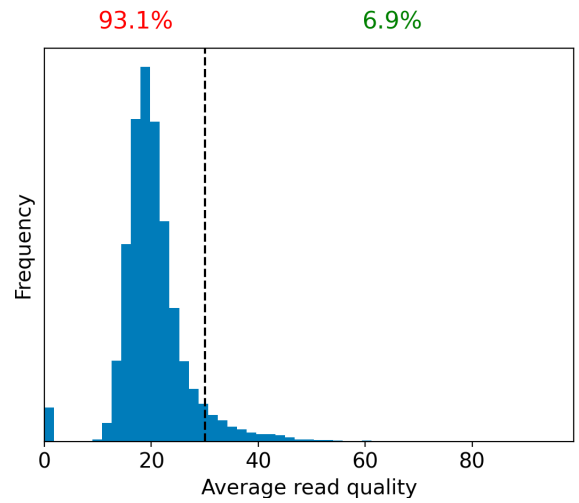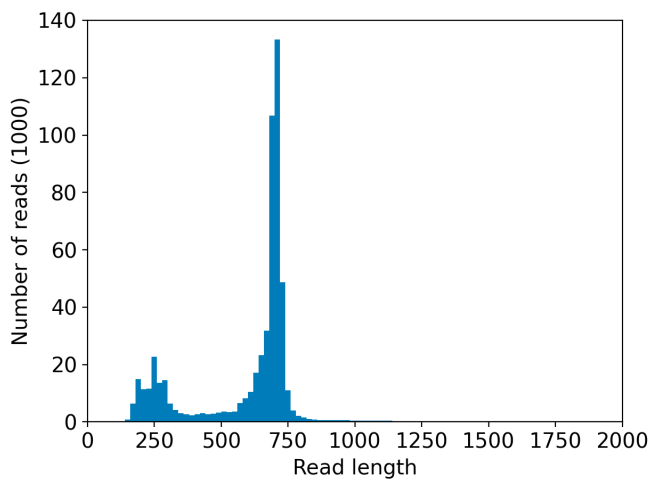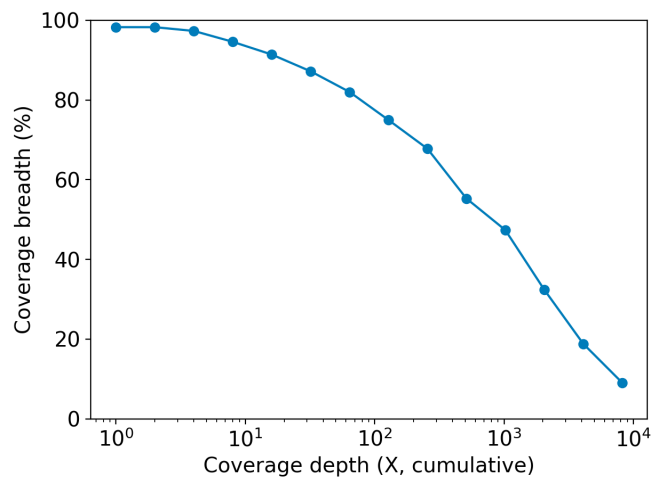

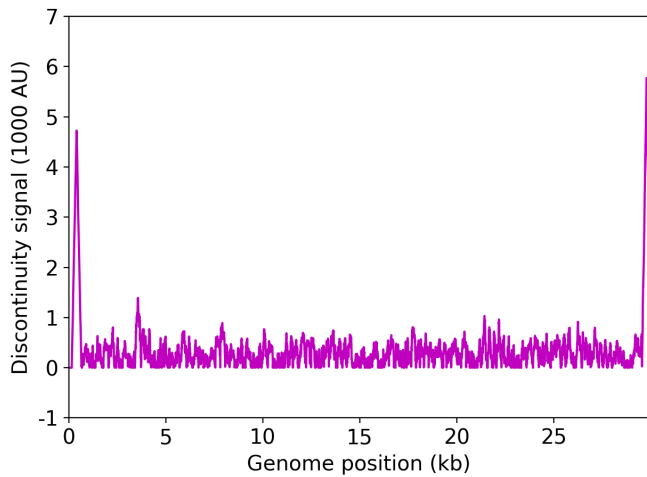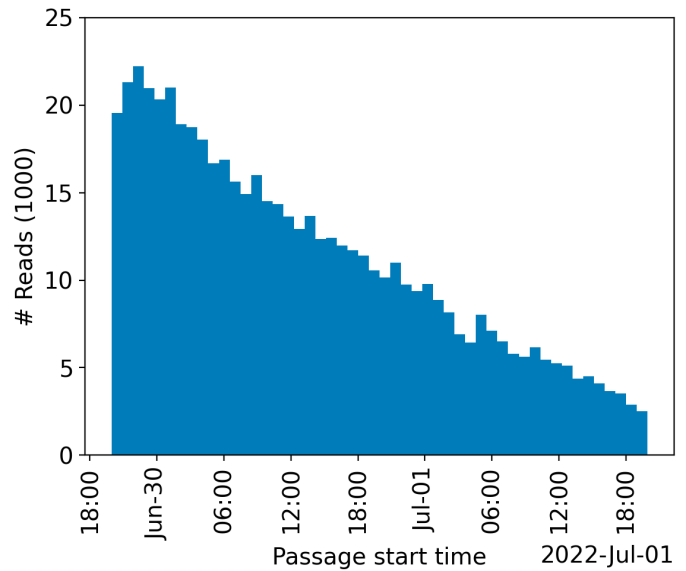

|                                                   | Uncovered coordinates (0X) | Poorly covered coordinates (<10X) |
|---------------------------------------------------|----------------------------|-----------------------------------|
| # Inaccessible genomic coordinates by kit design: | 152nt (0%)                 | 152nt (0%)                        |
| All genomic coordinates:                          | 511nt (1%)                 | 1874nt (6%)                       |
| Common SNPs:                                      | 1nt (2%)                   | 1nt (2%)                          |
| Diverse SNPs:                                     | 29nt (12%)                 | 29nt (12%)                        |
| Rare SNPs:                                        | 66nt (7%)                  | 66nt (7%)                         |

SNPs refer to the polymorphic sites currently in circulation that were detected out of recent GISAID entries. The sites that differ from the SC2 reference sequence are denoted as "common" if [90%, 100%] of the submissions carry this mutation, whereas those that are prevalent in [0%,10%] of the submissions are grouped under the "rare" category. The population is still diverse at the mutation sites that are observed in (10%,90%) of the entries and these coordinates are grouped under the "diverse" category.

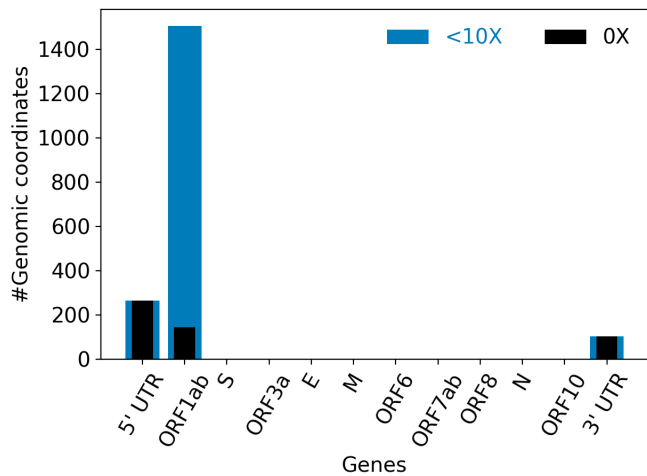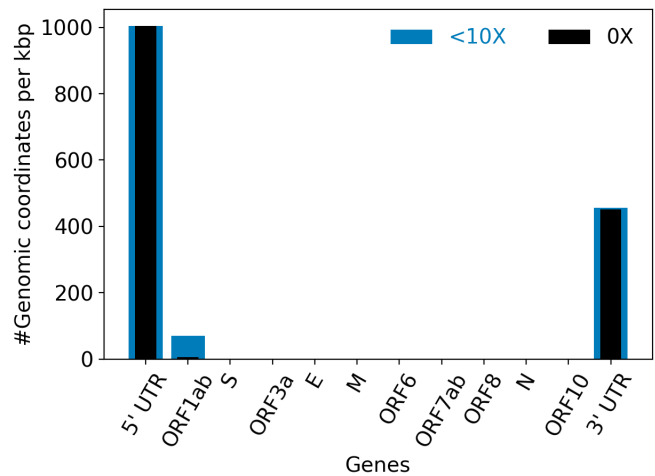

|                                                     |                        |
|-----------------------------------------------------|------------------------|
| Hits to SARS-Cov2 genome (kraken2):                 | 443611 reads (78.97%)  |
| Hits to human genome (kraken2):                     | 5188 reads (0.92%)     |
| Hits to synthetic sequences (kraken2, taxid 28384): | 0 reads (0.00%)        |
|                                                     | Coronaviridae (78.97%) |

Most abundant organisms (kraken2, family level):

Arcobacteraceae (1.92%)  
Hominidae (0.92%)  
Enterobacteriaceae (0.32%)  
Bacteroidaceae (0.27%)

## Detected variants (Experimental)

Abundance of variants by linear regression  
Omicron

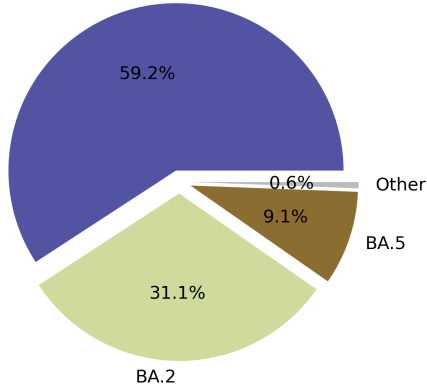

Abundance of variants by kallisto

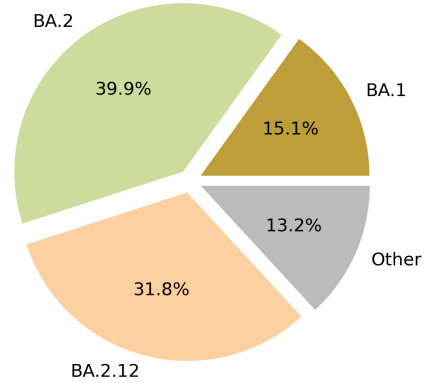

Based on deconvolution, [B.1.1.529](#) is estimated to constitute 59.23% of the viral particles and hence is the most abundant variant in the sample. The  $R^2$  for the linear regression was 0.63. Variants that were detected less than 5% were grouped under "Other"

Based on the consensus sequence of the observed reads, the "ensemble-averaged sequence" most closely resembles the [BA.2](#) lineage. If this is a sample consisting of a single source of pathogens or an overwhelming majority of the different sources are infected with the same variant, the sample is dominated by this variant.

Based on mapping individual reads to the variant consensus sequences in the reference database, kallisto predicts that the sample is dominated by [BA.2](#) lineage. Accuracy of this measure is expected to improve if the input data consists of long reads as opposed to convolution.

Abundance of variants by kraken2+bracken, using majorCovid DB

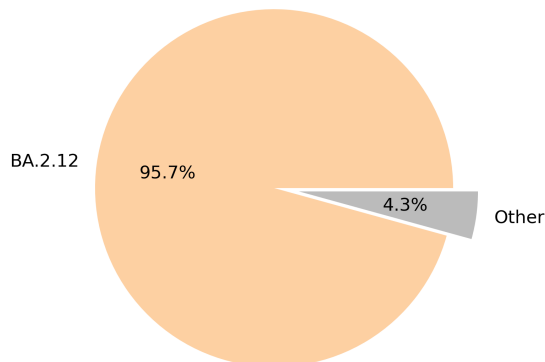

Abundance of variants by Freyja  
BA.5

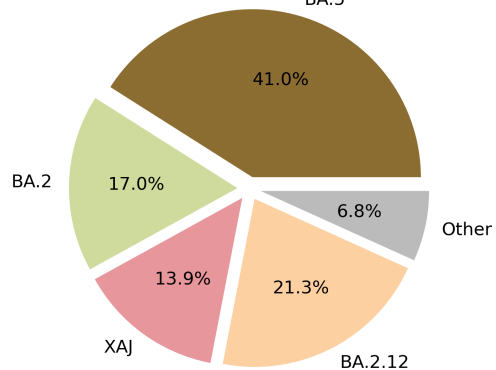

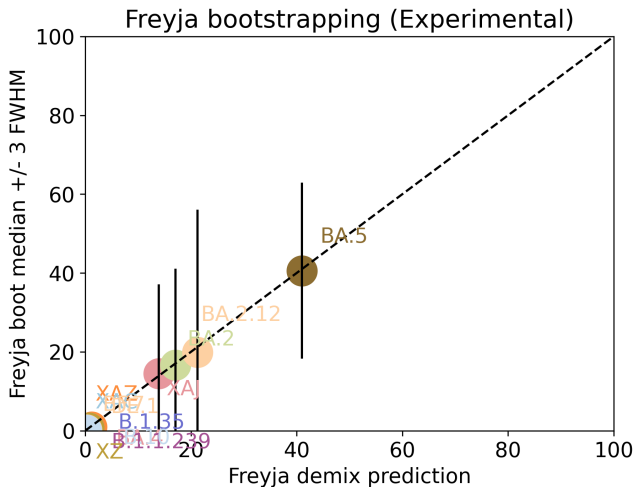

Under the assumption that the presence of a variant requires the detection of all respective mutations of the variant, the characteristic mutations which support the presence of the respective variant are indicated in the respective column of the table. Numbers show the number of mutations detected, if any, and the number of mutations expected to be present based on the variant definitions.

| VOC                               | <a href="#">B.1.617.2</a>                  | <a href="#">BA.1</a>                                          | <a href="#">BA.2</a>                                                                                                                                                                                                                                                                                                                           | <a href="#">BA.3</a>                                                                                                                                                 | <a href="#">BA.4</a>                                                                                                                                                                                                                                                                                                     | <a href="#">BA.5</a>                                                                                                                                                                                                                                                                                |
|-----------------------------------|--------------------------------------------|---------------------------------------------------------------|------------------------------------------------------------------------------------------------------------------------------------------------------------------------------------------------------------------------------------------------------------------------------------------------------------------------------------------------|----------------------------------------------------------------------------------------------------------------------------------------------------------------------|--------------------------------------------------------------------------------------------------------------------------------------------------------------------------------------------------------------------------------------------------------------------------------------------------------------------------|-----------------------------------------------------------------------------------------------------------------------------------------------------------------------------------------------------------------------------------------------------------------------------------------------------|
| Characteristic mutations detected | (3 of 13)<br>S:G142D<br>S:L452R<br>S:T478K | (5 of 26)<br>M:D3G<br>NUC:C25000T<br>ORF1AB:I3758V<br>S:Q493R | (23 of 31)<br>N:S413R<br>NUC:A20055G<br>NUC:A9424G<br>NUC:C10198T<br>NUC:C12880T<br>NUC:C15714T<br>NUC:C25000T<br>NUC:C25584T<br>NUC:C26858T<br>NUC:C4321T<br>NUC:G10447A<br>ORF1AB:G1307S<br>ORF1AB:L3027F<br>ORF1AB:L3201F<br>ORF1AB:S135R<br>ORF1AB:T3090I<br>ORF1AB:T842I<br>S:D405N<br>S:Q493R<br>S:S371F<br>S:R408S<br>S:T19I<br>S:T376A | (11 of 21)<br>N:S413R<br>NUC:C12880T<br>NUC:C15714T<br>NUC:C26858T<br>NUC:G10447A<br>ORF1AB:G1307S<br>ORF1AB:S135R<br>ORF1AB:T3090I<br>S:D405N<br>S:Q493R<br>S:S371F | (22 of 31)<br>N:S413R<br>NUC:A20055G<br>NUC:C10198T<br>NUC:C12880T<br>NUC:C15714T<br>NUC:C25000T<br>NUC:C25584T<br>NUC:C26858T<br>NUC:C4321T<br>NUC:G10447A<br>NUC:G27788T<br>ORF1AB:G1307S<br>ORF1AB:S135R<br>ORF1AB:T3090I<br>ORF1AB:T842I<br>S:D405N<br>S:F486V<br>S:L452R<br>S:S371F<br>S:T19I<br>S:T376A<br>S:V213G | (21 of 28)<br>M:D3N<br>N:S413R<br>NUC:A20055G<br>NUC:C10198T<br>NUC:C12880T<br>NUC:C15714T<br>NUC:C25000T<br>NUC:C25584T<br>NUC:C4321T<br>NUC:G10447A<br>ORF1AB:G1307S<br>ORF1AB:S135R<br>ORF1AB:T3090I<br>ORF1AB:T842I<br>S:D405N<br>S:F486V<br>S:L452R<br>S:S371F<br>S:T19I<br>S:T376A<br>S:V213G |

[Jaccard Index](#) is a measure of similarity between two sets A and B, reaching the maximum value of 1 if  $A=B$  and minimum value of 0 if  $A \cap B = \{\}$ . In the c(d) representation below, c represents the Jaccard index of the set of mutations that were experimentally detected for this sample as listed above, whereas d refers to the ideal value of the Jaccard index expected from complete genome coverage without any sequencing errors.

|                           | <a href="#">B.1.617.2</a>     | <a href="#">BA.1</a>          | <a href="#">BA.2</a>          | <a href="#">BA.3</a>          | <a href="#">BA.4</a>          | <a href="#">BA.5</a>          |
|---------------------------|-------------------------------|-------------------------------|-------------------------------|-------------------------------|-------------------------------|-------------------------------|
| <a href="#">B.1.617.2</a> | 1.00 ( <a href="#">1.00</a> ) | 0.00 ( <a href="#">0.00</a> ) | 0.00 ( <a href="#">0.00</a> ) | 0.00 ( <a href="#">0.00</a> ) | 0.04 ( <a href="#">0.02</a> ) | 0.04 ( <a href="#">0.03</a> ) |
| <a href="#">BA.1</a>      | 0.00 ( <a href="#">0.00</a> ) | 1.00 ( <a href="#">1.00</a> ) | 0.12 ( <a href="#">0.10</a> ) | 0.07 ( <a href="#">0.21</a> ) | 0.08 ( <a href="#">0.08</a> ) | 0.08 ( <a href="#">0.08</a> ) |
| <a href="#">BA.2</a>      | 0.00 ( <a href="#">0.00</a> ) | 0.12 ( <a href="#">0.10</a> ) | 1.00 ( <a href="#">1.00</a> ) | 0.48 ( <a href="#">0.33</a> ) | 0.67 ( <a href="#">0.63</a> ) | 0.63 ( <a href="#">0.59</a> ) |
| <a href="#">BA.3</a>      | 0.00 ( <a href="#">0.00</a> ) | 0.07 ( <a href="#">0.21</a> ) | 0.48 ( <a href="#">0.33</a> ) | 1.00 ( <a href="#">1.00</a> ) | 0.43 ( <a href="#">0.30</a> ) | 0.39 ( <a href="#">0.29</a> ) |
| <a href="#">BA.4</a>      | 0.04 ( <a href="#">0.02</a> ) | 0.08 ( <a href="#">0.08</a> ) | 0.67 ( <a href="#">0.63</a> ) | 0.43 ( <a href="#">0.30</a> ) | 1.00 ( <a href="#">1.00</a> ) | 0.87 ( <a href="#">0.84</a> ) |



BA.5

0.04 ([0.03](#))

0.08 ([0.08](#))

0.63 ([0.59](#))

0.39 ([0.29](#))

0.87 ([0.84](#))

1.00 ([1.00](#))

## Detected mutations

Excluded from this pdf version due to file size limitations.

**CFSAN/OAO**  
**BIostatistics AND Bioinformatics Staff**

# WASTEWATER SARS-COV2 ANALYSIS REPORT

|                                  |                                                                                                              |
|----------------------------------|--------------------------------------------------------------------------------------------------------------|
| Sample name:                     | CFSANSMP000119226                                                                                            |
| Date generated:                  | 2023-02-02, 09:10:42 EST                                                                                     |
| Timestamp of C-WAP version used: | Tue Jan 31 11:49:22 2023 -0500                                                                               |
| Executed by:                     | Jasmine Amirzadegan ( <a href="mailto:Jasmine.Amirzadegan@fda.hhs.gov">Jasmine.Amirzadegan@fda.hhs.gov</a> ) |
| Executed on:                     | 172.20.44.140 (aka n140.raven.cfsan)                                                                         |

## Sequencing summary

|                                      |                               |
|--------------------------------------|-------------------------------|
| Sequencing chemistry:                | Missing with Missing          |
| Source site:                         | <a href="#">Missing (?.?)</a> |
| Sampling date:                       | Missing                       |
| Collected by:                        | Missing                       |
| Sequenced by:                        | Missing                       |
| Total number of reads:               | 1638438                       |
| Reads aligned:                       | 1286637 (78%)                 |
| Average read quality:                | 19.8                          |
| Average read length:                 | 692                           |
| Reads passing filter:                | 1286629 (78%)                 |
| Average read quality passing filter: | 19.8                          |
| Average read length passing filter:  | 692                           |
| Average coverage passing filter:     | 29774X                        |

A read passes filter if the read length after adaptor trimming  $\geq 30$  and minimum read quality  $\geq 20$  within a sliding window of width 4.

## Overall sequence characteristics

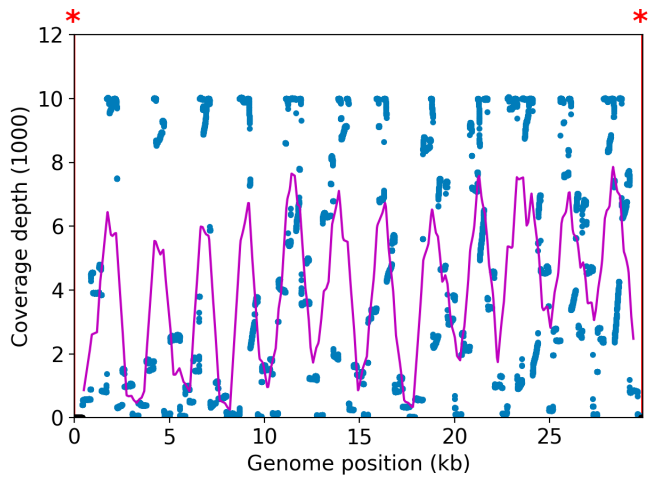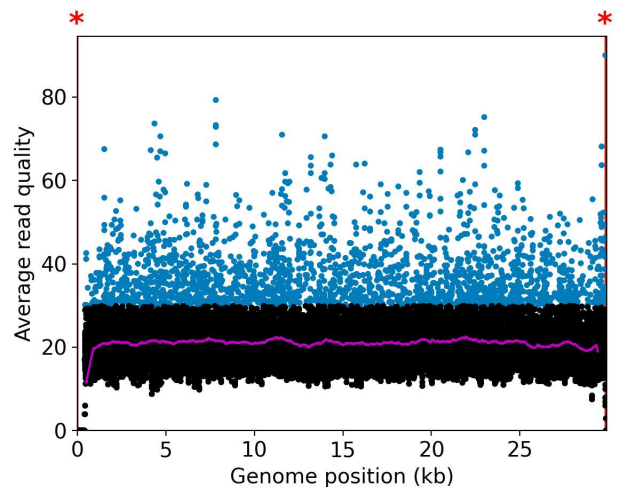

NOTE: The red shaded areas marked with a (\*) are not covered by the design of the library preparation kit and hence excluded from analyses. Magenta curves represent moving average with a window width of 1kb.

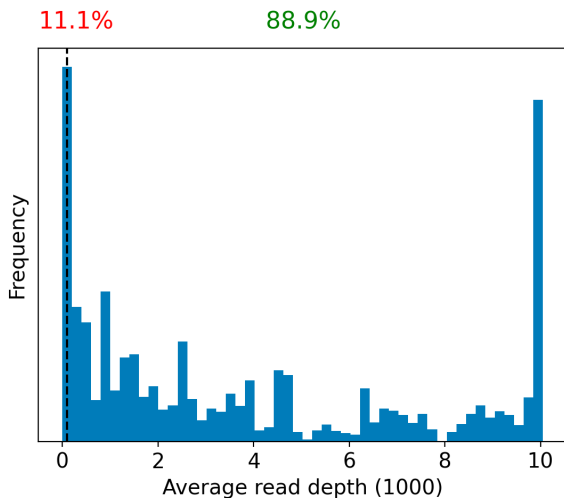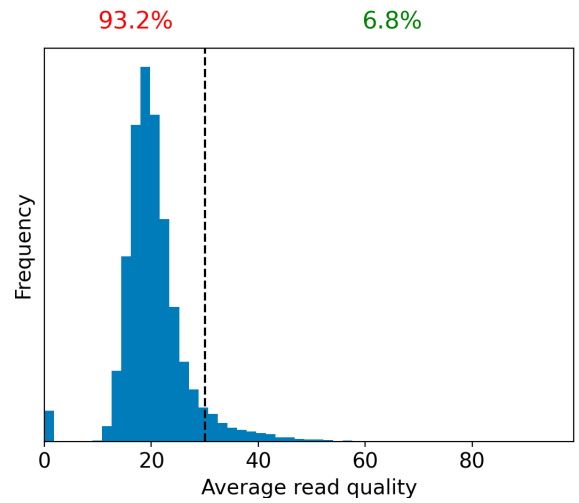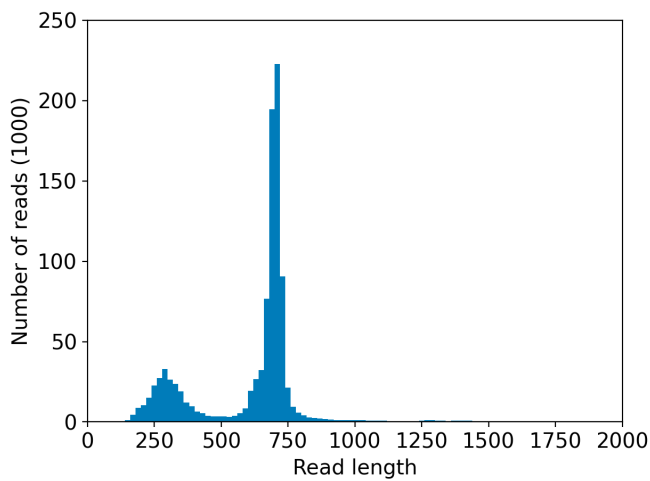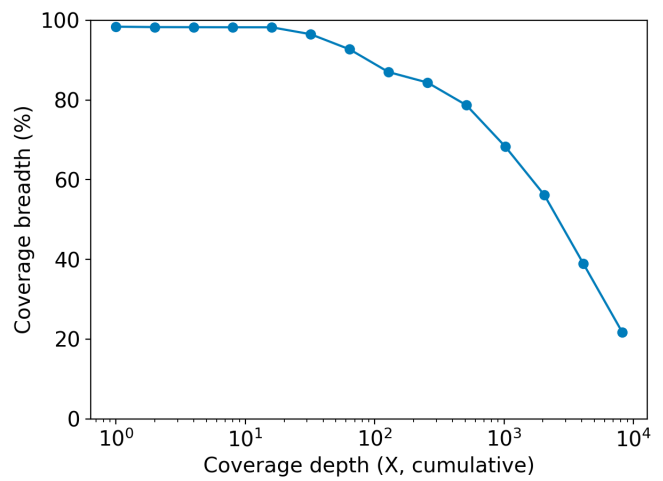

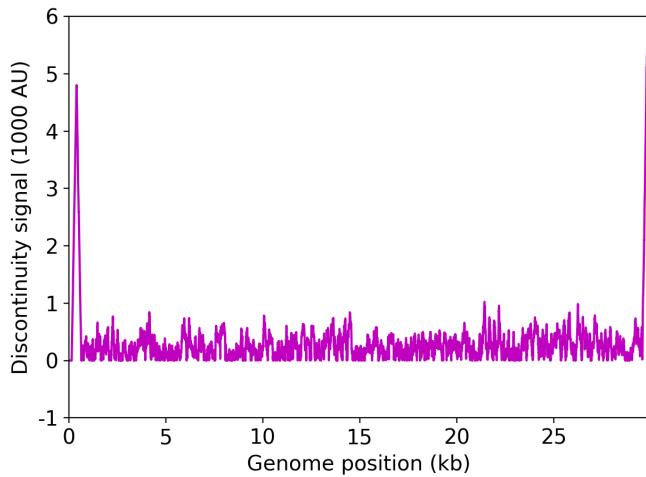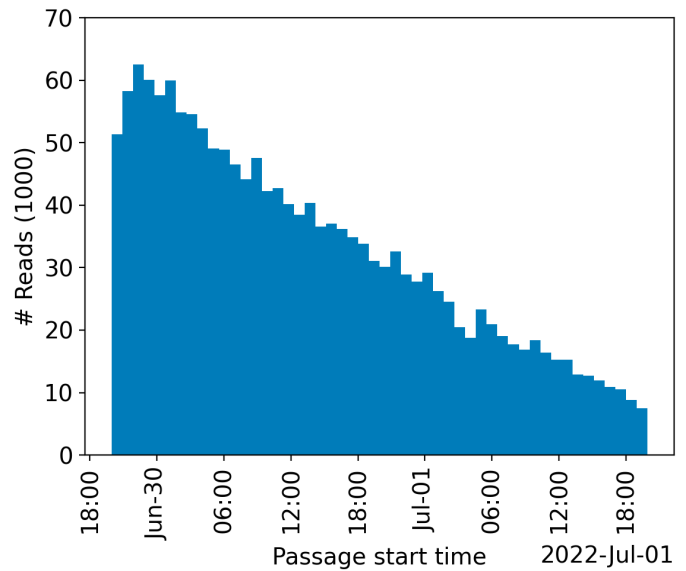

|                                                   | Uncovered coordinates (0X) | Poorly covered coordinates (<10X) |
|---------------------------------------------------|----------------------------|-----------------------------------|
| # Inaccessible genomic coordinates by kit design: | 152nt (0%)                 | 152nt (0%)                        |
| All genomic coordinates:                          | 475nt (1%)                 | 521nt (1%)                        |
| Common SNPs:                                      | 1nt (2%)                   | 1nt (2%)                          |
| Diverse SNPs:                                     | 29nt (12%)                 | 29nt (12%)                        |
| Rare SNPs:                                        | 61nt (6%)                  | 66nt (7%)                         |

SNPs refer to the polymorphic sites currently in circulation that were detected out of recent GISAID entries. The sites that differ from the SC2 reference sequence are denoted as "common" if [90%, 100%] of the submissions carry this mutation, whereas those that are prevalent in [0%,10%] of the submissions are grouped under the "rare" category. The population is still diverse at the mutation sites that are observed in (10%,90%) of the entries and these coordinates are grouped under the "diverse" category.

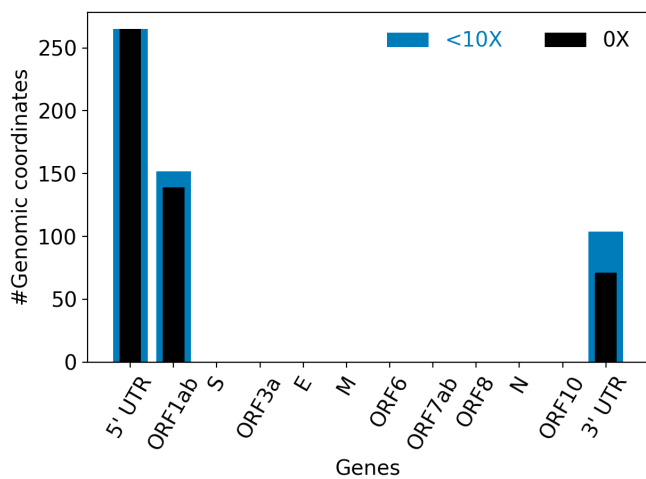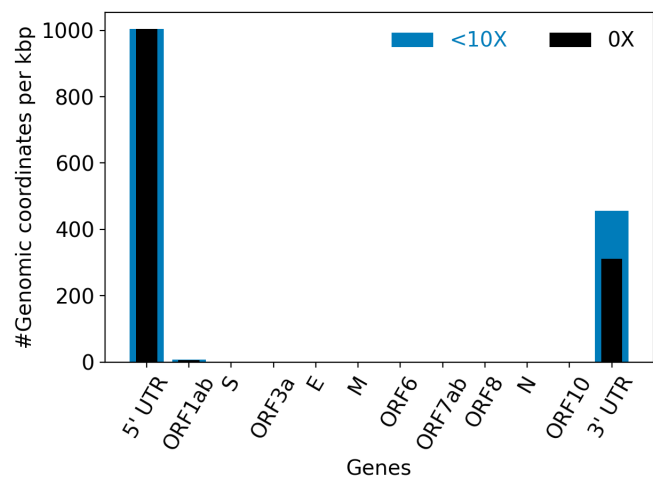

|                                                     |                        |
|-----------------------------------------------------|------------------------|
| Hits to SARS-Cov2 genome (kraken2):                 | 1276934 reads (77.94%) |
| Hits to human genome (kraken2):                     | 13346 reads (0.81%)    |
| Hits to synthetic sequences (kraken2, taxid 28384): | 0 reads (0.00%)        |
|                                                     | Coronaviridae (77.94%) |

Most abundant organisms (kraken2, family level):

Arcobacteraceae (1.39%)  
Hominidae (0.81%)  
Enterobacteriaceae (0.21%)  
Bacteroidaceae (0.09%)

## Detected variants (Experimental)

Abundance of variants by linear regression  
Omicron

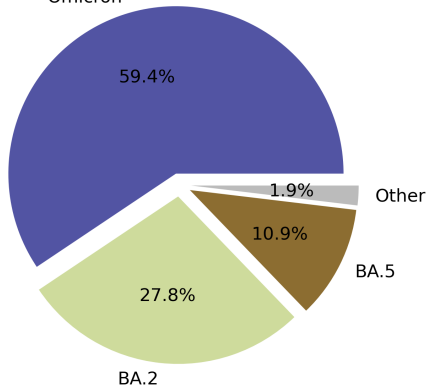

Abundance of variants by kallisto  
BA.2

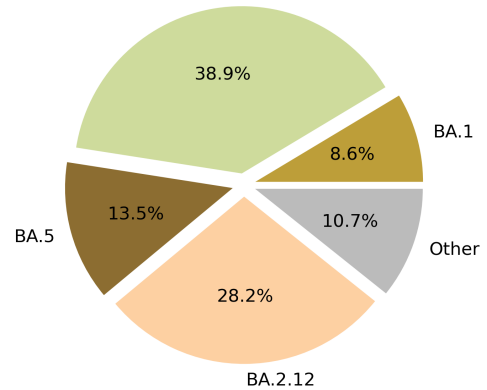

Based on deconvolution, [B.1.1.529](#) is estimated to constitute 59.36% of the viral particles and hence is the most abundant variant in the sample. The  $R^2$  for the linear regression was 0.63. Variants that were detected less than 5% were grouped under "Other"

Based on the consensus sequence of the observed reads, the "ensemble-averaged sequence" most closely resembles the [BA.2](#) lineage. If this is a sample consisting of a single source of pathogens or an overwhelming majority of the different sources are infected with the same variant, the sample is dominated by this variant.

Based on mapping individual reads to the variant consensus sequences in the reference database, kallisto predicts that the sample is dominated by [BA.2](#) lineage. Accuracy of this measure is expected to improve if the input data consists of long reads as opposed to convolution.

Abundance of variants by kraken2+bracken, using majorCovid DB

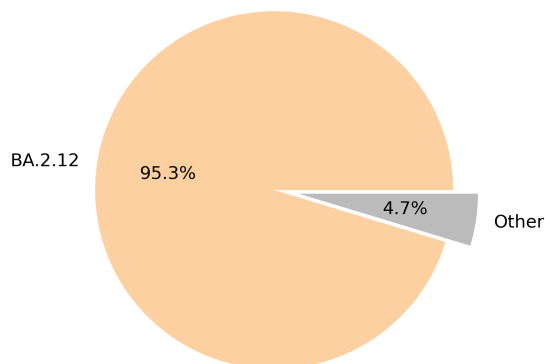

Abundance of variants by Freyja

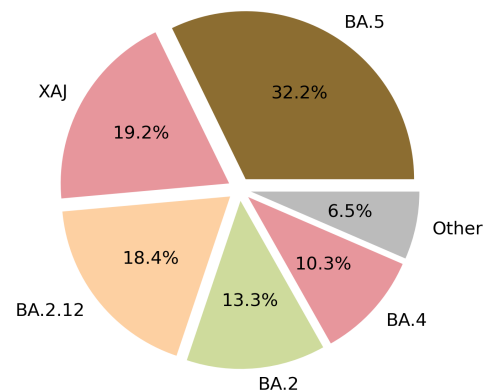

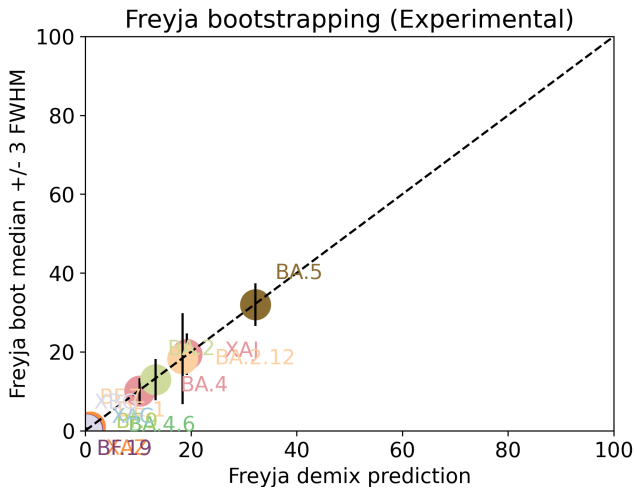

Under the assumption that the presence of a variant requires the detection of all respective mutations of the variant, the characteristic mutations which support the presence of the respective variant are indicated in the respective column of the table. Numbers show the number of mutations detected, if any, and the number of mutations expected to be present based on the variant definitions.

| VOC                               | <a href="#">B.1.617.2</a>                  | <a href="#">BA.1</a>                                                         | <a href="#">BA.2</a>                                                                                                                                                                                                                                                                                                                           | <a href="#">BA.3</a>                                                                                                                                                 | <a href="#">BA.4</a>                                                                                                                                                                                                                                                                                                     | <a href="#">BA.5</a>                                                                                                                                                                                                                                                                                |
|-----------------------------------|--------------------------------------------|------------------------------------------------------------------------------|------------------------------------------------------------------------------------------------------------------------------------------------------------------------------------------------------------------------------------------------------------------------------------------------------------------------------------------------|----------------------------------------------------------------------------------------------------------------------------------------------------------------------|--------------------------------------------------------------------------------------------------------------------------------------------------------------------------------------------------------------------------------------------------------------------------------------------------------------------------|-----------------------------------------------------------------------------------------------------------------------------------------------------------------------------------------------------------------------------------------------------------------------------------------------------|
| Characteristic mutations detected | (3 of 13)<br>S:G142D<br>S:L452R<br>S:T478K | (5 of 26)<br>M:D3G<br>NUC:C25000T<br>NUC:C25584T<br>ORF1AB:I3758V<br>S:Q493R | (23 of 31)<br>N:S413R<br>NUC:A20055G<br>NUC:A9424G<br>NUC:C10198T<br>NUC:C12880T<br>NUC:C15714T<br>NUC:C25000T<br>NUC:C25584T<br>NUC:C26858T<br>NUC:C4321T<br>NUC:G10447A<br>ORF1AB:G1307S<br>ORF1AB:L3027F<br>ORF1AB:L3201F<br>ORF1AB:S135R<br>ORF1AB:T3090I<br>ORF1AB:T842I<br>S:D405N<br>S:Q493R<br>S:S371F<br>S:R408S<br>S:T19I<br>S:T376A | (11 of 21)<br>N:S413R<br>NUC:C12880T<br>NUC:C15714T<br>NUC:C26858T<br>NUC:G10447A<br>ORF1AB:G1307S<br>ORF1AB:S135R<br>ORF1AB:T3090I<br>S:D405N<br>S:Q493R<br>S:S371F | (22 of 31)<br>N:S413R<br>NUC:A20055G<br>NUC:C10198T<br>NUC:C12880T<br>NUC:C15714T<br>NUC:C25000T<br>NUC:C25584T<br>NUC:C26858T<br>NUC:C4321T<br>NUC:G10447A<br>NUC:G27788T<br>ORF1AB:G1307S<br>ORF1AB:S135R<br>ORF1AB:T3090I<br>ORF1AB:T842I<br>S:D405N<br>S:F486V<br>S:L452R<br>S:S371F<br>S:T19I<br>S:T376A<br>S:V213G | (21 of 28)<br>M:D3N<br>N:S413R<br>NUC:A20055G<br>NUC:C10198T<br>NUC:C12880T<br>NUC:C15714T<br>NUC:C25000T<br>NUC:C25584T<br>NUC:C4321T<br>NUC:G10447A<br>ORF1AB:G1307S<br>ORF1AB:S135R<br>ORF1AB:T3090I<br>ORF1AB:T842I<br>S:D405N<br>S:F486V<br>S:L452R<br>S:S371F<br>S:T19I<br>S:T376A<br>S:V213G |

[Jaccard Index](#) is a measure of similarity between two sets A and B, reaching the maximum value of 1 if A=B and minimum value of 0 if  $A \cap B = \{\}$ . In the c(d) representation below, c represents the Jaccard index of the set of mutations that were experimentally detected for this sample as listed above, whereas d refers to the ideal value of the Jaccard index expected from complete genome coverage without any sequencing errors.

|                           | <a href="#">B.1.617.2</a>     | <a href="#">BA.1</a>          | <a href="#">BA.2</a>          | <a href="#">BA.3</a>          | <a href="#">BA.4</a>          | <a href="#">BA.5</a>          |
|---------------------------|-------------------------------|-------------------------------|-------------------------------|-------------------------------|-------------------------------|-------------------------------|
| <a href="#">B.1.617.2</a> | 1.00 ( <a href="#">1.00</a> ) | 0.00 ( <a href="#">0.00</a> ) | 0.00 ( <a href="#">0.00</a> ) | 0.00 ( <a href="#">0.00</a> ) | 0.04 ( <a href="#">0.02</a> ) | 0.04 ( <a href="#">0.03</a> ) |
| <a href="#">BA.1</a>      | 0.00 ( <a href="#">0.00</a> ) | 1.00 ( <a href="#">1.00</a> ) | 0.12 ( <a href="#">0.10</a> ) | 0.07 ( <a href="#">0.21</a> ) | 0.08 ( <a href="#">0.08</a> ) | 0.08 ( <a href="#">0.08</a> ) |
| <a href="#">BA.2</a>      | 0.00 ( <a href="#">0.00</a> ) | 0.12 ( <a href="#">0.10</a> ) | 1.00 ( <a href="#">1.00</a> ) | 0.48 ( <a href="#">0.33</a> ) | 0.67 ( <a href="#">0.63</a> ) | 0.63 ( <a href="#">0.59</a> ) |
| <a href="#">BA.3</a>      | 0.00 ( <a href="#">0.00</a> ) | 0.07 ( <a href="#">0.21</a> ) | 0.48 ( <a href="#">0.33</a> ) | 1.00 ( <a href="#">1.00</a> ) | 0.43 ( <a href="#">0.30</a> ) | 0.39 ( <a href="#">0.29</a> ) |
| <a href="#">BA.4</a>      | 0.04 ( <a href="#">0.02</a> ) | 0.08 ( <a href="#">0.08</a> ) | 0.67 ( <a href="#">0.63</a> ) | 0.43 ( <a href="#">0.30</a> ) | 1.00 ( <a href="#">1.00</a> ) | 0.87 ( <a href="#">0.84</a> ) |

BA.5

0.04 ([0.03](#))

0.08 ([0.08](#))

0.63 ([0.59](#))

0.39 ([0.29](#))

0.87 ([0.84](#))

1.00 ([1.00](#))

## Detected mutations

Excluded from this pdf version due to file size limitations.

**CFSAN/OAO**  
**BIostatistics AND BIOinformatics STAFF**

# WASTEWATER SARS-COV2 ANALYSIS REPORT

|                                  |                                                                                                              |
|----------------------------------|--------------------------------------------------------------------------------------------------------------|
| Sample name:                     | CFSANSMP000119227                                                                                            |
| Date generated:                  | 2023-02-02, 09:08:40 EST                                                                                     |
| Timestamp of C-WAP version used: | Tue Jan 31 11:49:22 2023 -0500                                                                               |
| Executed by:                     | Jasmine Amirzadegan ( <a href="mailto:Jasmine.Amirzadegan@fda.hhs.gov">Jasmine.Amirzadegan@fda.hhs.gov</a> ) |
| Executed on:                     | 172.20.44.123 (aka n123.raven.cfsan)                                                                         |

## Sequencing summary

|                                      |                               |
|--------------------------------------|-------------------------------|
| Sequencing chemistry:                | Missing with Missing          |
| Source site:                         | <a href="#">Missing (?.?)</a> |
| Sampling date:                       | Missing                       |
| Collected by:                        | Missing                       |
| Sequenced by:                        | Missing                       |
| Total number of reads:               | 1336574                       |
| Reads aligned:                       | 1005999 (75%)                 |
| Average read quality:                | 19.7                          |
| Average read length:                 | 679                           |
| Reads passing filter:                | 1005993 (75%)                 |
| Average read quality passing filter: | 19.7                          |
| Average read length passing filter:  | 679                           |
| Average coverage passing filter:     | 22842X                        |

A read passes filter if the read length after adaptor trimming  $\geq 30$  and minimum read quality  $\geq 20$  within a sliding window of width 4.

## Overall sequence characteristics



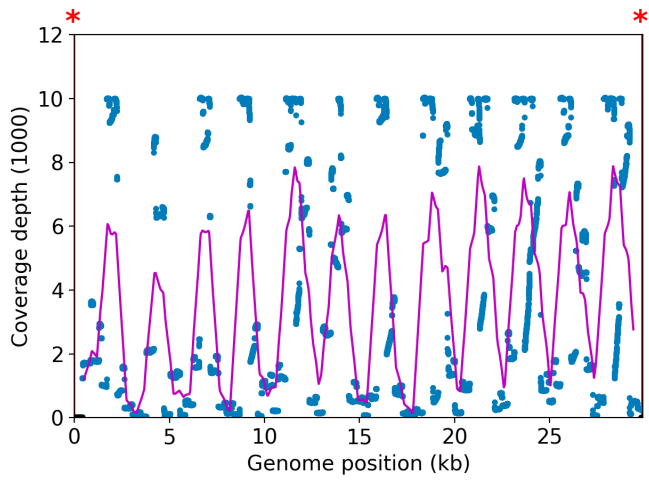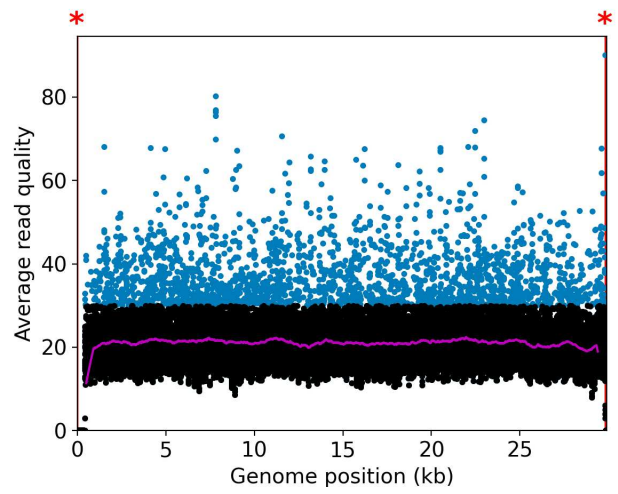

NOTE: The red shaded areas marked with a (\*) are not covered by the design of the library preparation kit and hence excluded from analyses. Magenta curves represent moving average with a window width of 1kb.

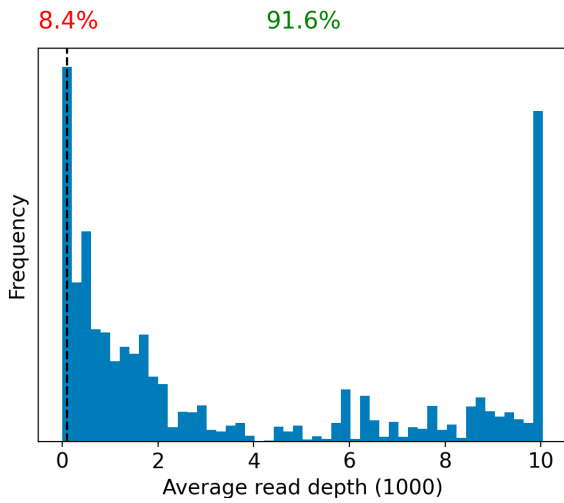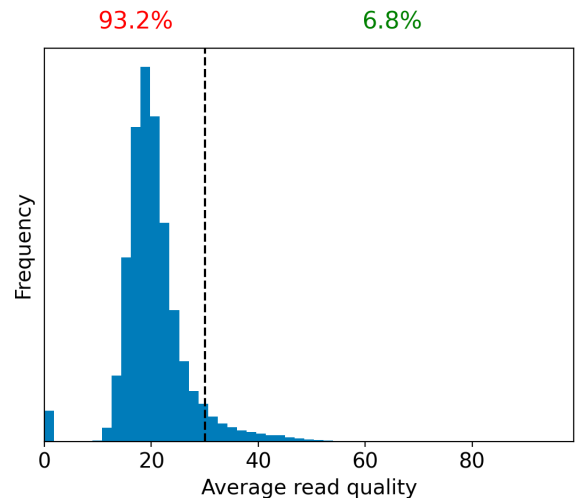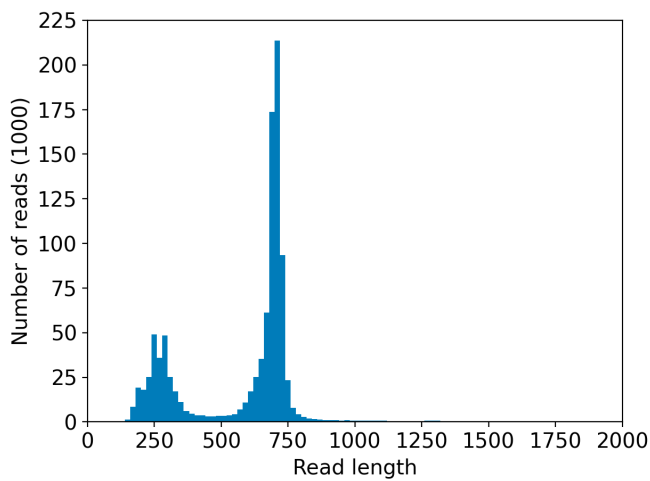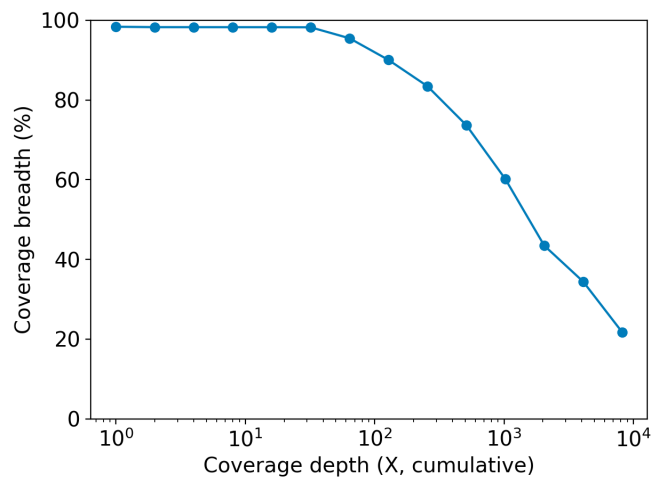

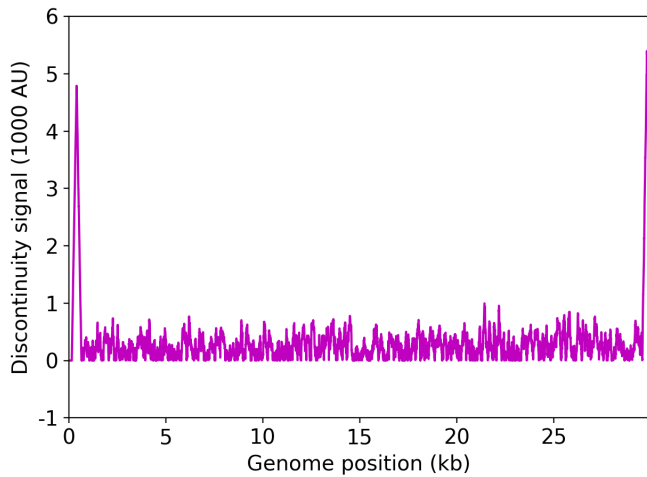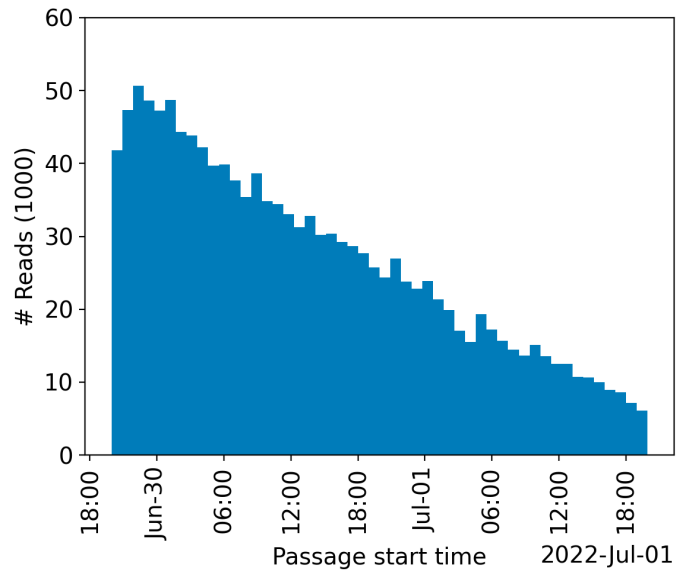

|                                                   | Uncovered coordinates (0X) | Poorly covered coordinates (<10X) |
|---------------------------------------------------|----------------------------|-----------------------------------|
| # Inaccessible genomic coordinates by kit design: | 152nt (0%)                 | 152nt (0%)                        |
| All genomic coordinates:                          | 480nt (1%)                 | 513nt (1%)                        |
| Common SNPs:                                      | 1nt (2%)                   | 1nt (2%)                          |
| Diverse SNPs:                                     | 29nt (12%)                 | 29nt (12%)                        |
| Rare SNPs:                                        | 61nt (6%)                  | 66nt (7%)                         |

SNPs refer to the polymorphic sites currently in circulation that were detected out of recent GISAID entries. The sites that differ from the SC2 reference sequence are denoted as "common" if [90%, 100%] of the submissions carry this mutation, whereas those that are prevalent in [0%,10%] of the submissions are grouped under the "rare" category. The population is still diverse at the mutation sites that are observed in (10%,90%) of the entries and these coordinates are grouped under the "diverse" category.

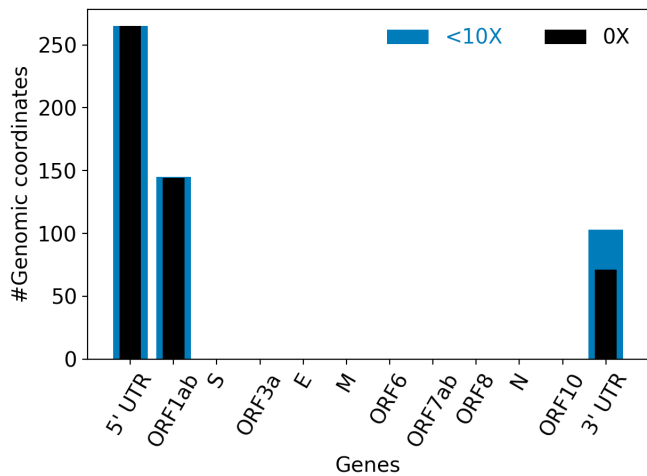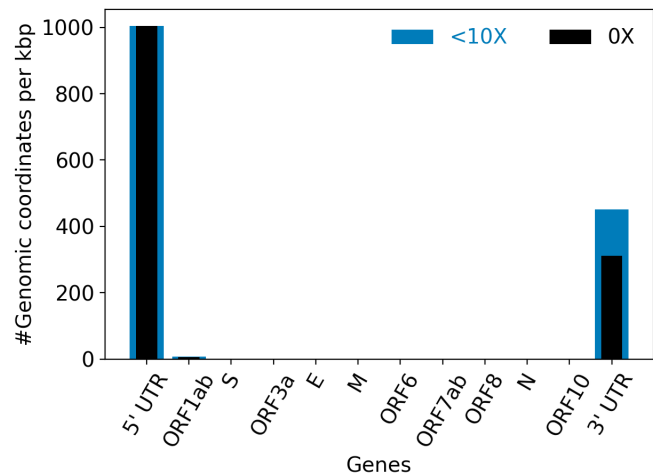

|                                                     |                        |
|-----------------------------------------------------|------------------------|
| Hits to SARS-Cov2 genome (kraken2):                 | 996786 reads (74.58%)  |
| Hits to human genome (kraken2):                     | 12251 reads (0.92%)    |
| Hits to synthetic sequences (kraken2, taxid 28384): | 0 reads (0.00%)        |
|                                                     | Coronaviridae (74.58%) |

Most abundant organisms (kraken2, family level):

Arcobacteraceae (1.18%)  
Hominidae (0.92%)  
Enterobacteriaceae (0.25%)  
Mycobacteriaceae (0.15%)

## Detected variants (Experimental)

Abundance of variants by linear regression  
Omicron

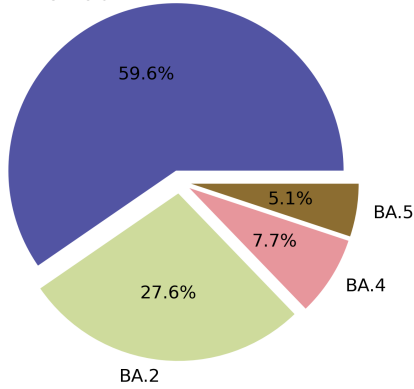

Abundance of variants by kallisto

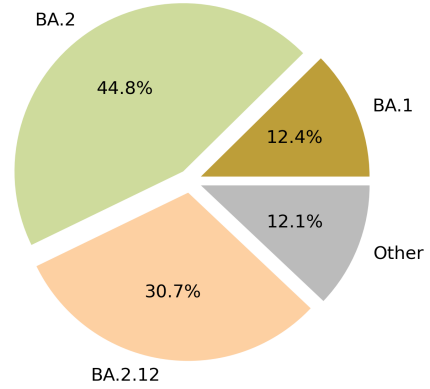

Based on deconvolution, [B.1.1.529](#) is estimated to constitute 59.58% of the viral particles and hence is the most abundant variant in the sample. The  $R^2$  for the linear regression was 0.63. Variants that were detected less than 5% were grouped under "Other"

Based on the consensus sequence of the observed reads, the "ensemble-averaged sequence" most closely resembles the [BA.2](#) lineage. If this is a sample consisting of a single source of pathogens or an overwhelming majority of the different sources are infected with the same variant, the sample is dominated by this variant.

Based on mapping individual reads to the variant consensus sequences in the reference database, kallisto predicts that the sample is dominated by [BA.2](#) lineage. Accuracy of this measure is expected to improve if the input data consists of long reads as opposed to convolution.

Abundance of variants by kraken2+bracken, using majorCovid DB

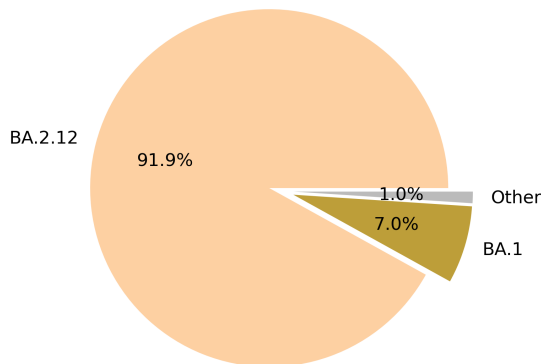

Abundance of variants by Freyja

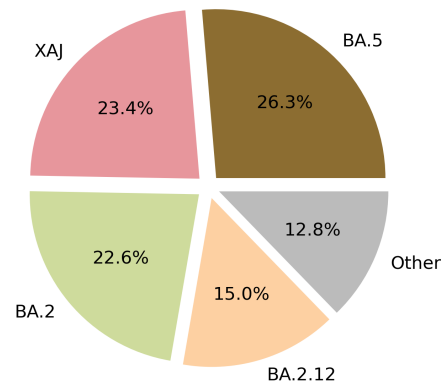

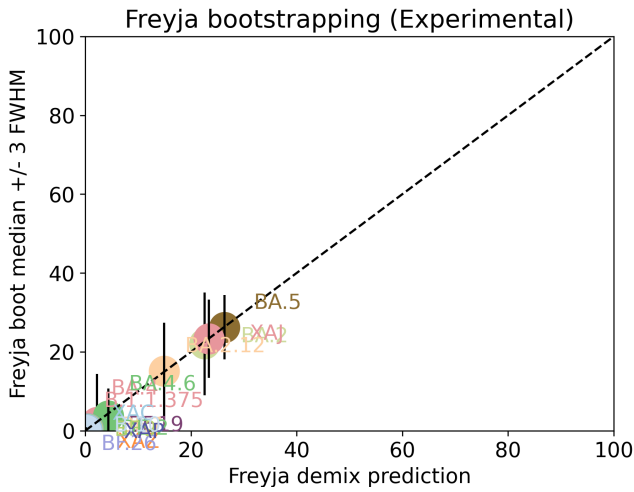

Under the assumption that the presence of a variant requires the detection of all respective mutations of the variant, the characteristic mutations which support the presence of the respective variant are indicated in the respective column of the table. Numbers show the number of mutations detected, if any, and the number of mutations expected to be present based on the variant definitions.

| VOC                               | <a href="#">B.1.617.2</a>                  | <a href="#">BA.1</a>                                                                        | <a href="#">BA.2</a>                                                                                                                                                                                                                                                                                                                           | <a href="#">BA.3</a>                                                                                                                                                 | <a href="#">BA.4</a>                                                                                                                                                                                                                                                                                                     | <a href="#">BA.5</a>                                                                                                                                                                                                                                                                       |
|-----------------------------------|--------------------------------------------|---------------------------------------------------------------------------------------------|------------------------------------------------------------------------------------------------------------------------------------------------------------------------------------------------------------------------------------------------------------------------------------------------------------------------------------------------|----------------------------------------------------------------------------------------------------------------------------------------------------------------------|--------------------------------------------------------------------------------------------------------------------------------------------------------------------------------------------------------------------------------------------------------------------------------------------------------------------------|--------------------------------------------------------------------------------------------------------------------------------------------------------------------------------------------------------------------------------------------------------------------------------------------|
| Characteristic mutations detected | (3 of 13)<br>S:G142D<br>S:L452R<br>S:T478K | (6 of 26)<br>M:D3G<br>NUC:C25000T<br>NUC:C25584T<br>NUC:T13195C<br>ORF1AB:I3758V<br>S:Q493R | (23 of 31)<br>N:S413R<br>NUC:A20055G<br>NUC:A9424G<br>NUC:C10198T<br>NUC:C12880T<br>NUC:C15714T<br>NUC:C25000T<br>NUC:C25584T<br>NUC:C26858T<br>NUC:C4321T<br>NUC:G10447A<br>ORF1AB:G1307S<br>ORF1AB:L3027F<br>ORF1AB:L3201F<br>ORF1AB:S135R<br>ORF1AB:T3090I<br>ORF1AB:T842I<br>S:D405N<br>S:Q493R<br>S:S371F<br>S:R408S<br>S:T19I<br>S:T376A | (11 of 21)<br>N:S413R<br>NUC:C12880T<br>NUC:C15714T<br>NUC:C26858T<br>NUC:G10447A<br>ORF1AB:G1307S<br>ORF1AB:S135R<br>ORF1AB:T3090I<br>S:D405N<br>S:Q493R<br>S:S371F | (22 of 31)<br>N:S413R<br>NUC:A20055G<br>NUC:C10198T<br>NUC:C12880T<br>NUC:C15714T<br>NUC:C25000T<br>NUC:C25584T<br>NUC:C26858T<br>NUC:C4321T<br>NUC:G10447A<br>NUC:G27788T<br>ORF1AB:G1307S<br>ORF1AB:S135R<br>ORF1AB:T3090I<br>ORF1AB:T842I<br>S:D405N<br>S:F486V<br>S:L452R<br>S:S371F<br>S:T19I<br>S:T376A<br>S:V213G | (20 of 28)<br>N:S413R<br>NUC:A20055G<br>NUC:C10198T<br>NUC:C12880T<br>NUC:C15714T<br>NUC:C25000T<br>NUC:C25584T<br>NUC:C4321T<br>NUC:G10447A<br>ORF1AB:G1307S<br>ORF1AB:S135R<br>ORF1AB:T3090I<br>ORF1AB:T842I<br>S:D405N<br>S:F486V<br>S:L452R<br>S:S371F<br>S:T19I<br>S:T376A<br>S:V213G |

[Jaccard Index](#) is a measure of similarity between two sets A and B, reaching the maximum value of 1 if A=B and minimum value of 0 if  $A \cap B = \{\}$ . In the c(d) representation below, c represents the Jaccard index of the set of mutations that were experimentally detected for this sample as listed above, whereas d refers to the ideal value of the Jaccard index expected from complete genome coverage without any sequencing errors.

|                           | <a href="#">B.1.617.2</a>     | <a href="#">BA.1</a>          | <a href="#">BA.2</a>          | <a href="#">BA.3</a>          | <a href="#">BA.4</a>          | <a href="#">BA.5</a>          |
|---------------------------|-------------------------------|-------------------------------|-------------------------------|-------------------------------|-------------------------------|-------------------------------|
| <a href="#">B.1.617.2</a> | 1.00 ( <a href="#">1.00</a> ) | 0.00 ( <a href="#">0.00</a> ) | 0.00 ( <a href="#">0.00</a> ) | 0.00 ( <a href="#">0.00</a> ) | 0.04 ( <a href="#">0.02</a> ) | 0.05 ( <a href="#">0.03</a> ) |
| <a href="#">BA.1</a>      | 0.00 ( <a href="#">0.00</a> ) | 1.00 ( <a href="#">1.00</a> ) | 0.12 ( <a href="#">0.10</a> ) | 0.06 ( <a href="#">0.21</a> ) | 0.08 ( <a href="#">0.08</a> ) | 0.08 ( <a href="#">0.08</a> ) |
| <a href="#">BA.2</a>      | 0.00 ( <a href="#">0.00</a> ) | 0.12 ( <a href="#">0.10</a> ) | 1.00 ( <a href="#">1.00</a> ) | 0.48 ( <a href="#">0.33</a> ) | 0.67 ( <a href="#">0.63</a> ) | 0.65 ( <a href="#">0.59</a> ) |
| <a href="#">BA.3</a>      | 0.00 ( <a href="#">0.00</a> ) | 0.06 ( <a href="#">0.21</a> ) | 0.48 ( <a href="#">0.33</a> ) | 1.00 ( <a href="#">1.00</a> ) | 0.43 ( <a href="#">0.30</a> ) | 0.41 ( <a href="#">0.29</a> ) |
| <a href="#">BA.4</a>      | 0.04 ( <a href="#">0.02</a> ) | 0.08 ( <a href="#">0.08</a> ) | 0.67 ( <a href="#">0.63</a> ) | 0.43 ( <a href="#">0.30</a> ) | 1.00 ( <a href="#">1.00</a> ) | 0.91 ( <a href="#">0.84</a> ) |

BA.5

0.05 ([0.03](#))

0.08 ([0.08](#))

0.65 ([0.59](#))

0.41 ([0.29](#))

0.91 ([0.84](#))

1.00 ([1.00](#))

## Detected mutations

Excluded from this pdf version due to file size limitations.

**CFSAN/OAO  
BIostatistics AND BIOinformatics STAFF**

# WASTEWATER SARS-COV2 ANALYSIS REPORT

|                                  |                                                                                                              |
|----------------------------------|--------------------------------------------------------------------------------------------------------------|
| Sample name:                     | CFSANSMP000119228                                                                                            |
| Date generated:                  | 2023-02-02, 09:08:23 EST                                                                                     |
| Timestamp of C-WAP version used: | Tue Jan 31 11:49:22 2023 -0500                                                                               |
| Executed by:                     | Jasmine Amirzadegan ( <a href="mailto:jasmine.Amirzadegan@fda.hhs.gov">jasmine.Amirzadegan@fda.hhs.gov</a> ) |
| Executed on:                     | 172.20.44.123 (aka n123.raven.cfsan)                                                                         |

## Sequencing summary

|                                      |                               |
|--------------------------------------|-------------------------------|
| Sequencing chemistry:                | Missing with Missing          |
| Source site:                         | <a href="#">Missing (?.?)</a> |
| Sampling date:                       | Missing                       |
| Collected by:                        | Missing                       |
| Sequenced by:                        | Missing                       |
| Total number of reads:               | 1037901                       |
| Reads aligned:                       | 725757 (69%)                  |
| Average read quality:                | 19.7                          |
| Average read length:                 | 681                           |
| Reads passing filter:                | 725752 (69%)                  |
| Average read quality passing filter: | 19.7                          |
| Average read length passing filter:  | 681                           |
| Average coverage passing filter:     | 16528X                        |

A read passes filter if the read length after adaptor trimming  $\geq 30$  and minimum read quality  $\geq 20$  within a sliding window of width 4.

## Overall sequence characteristics

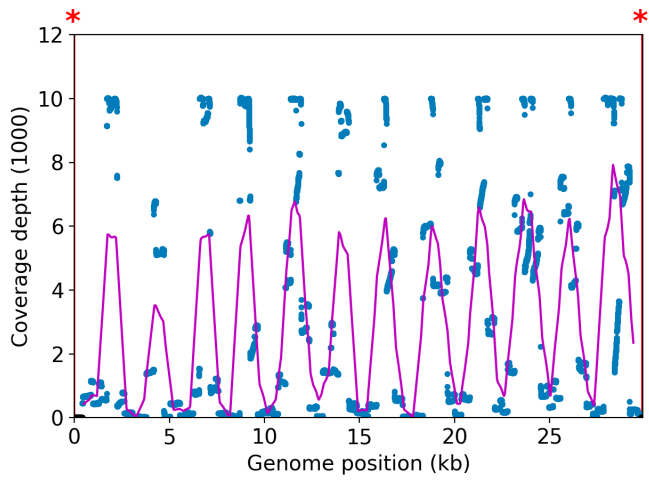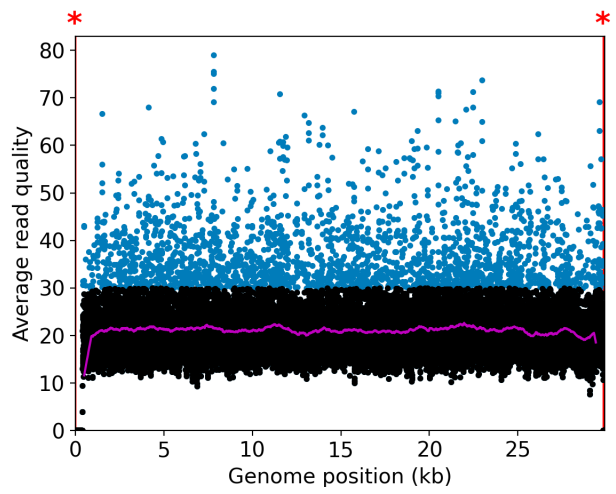

NOTE: The red shaded areas marked with a (\*) are not covered by the design of the library preparation kit and hence excluded from analyses. Magenta curves represent moving average with a window width of 1kb.

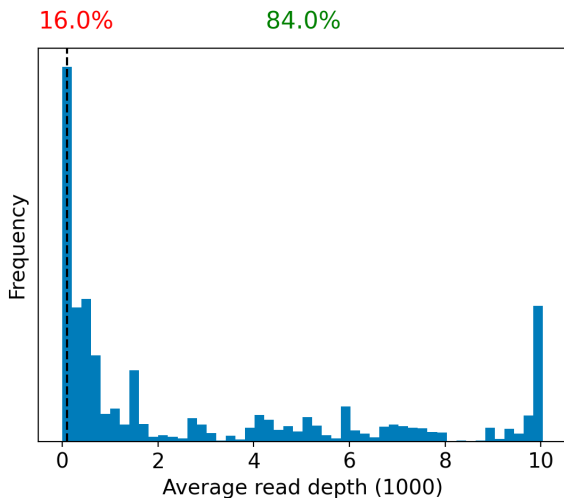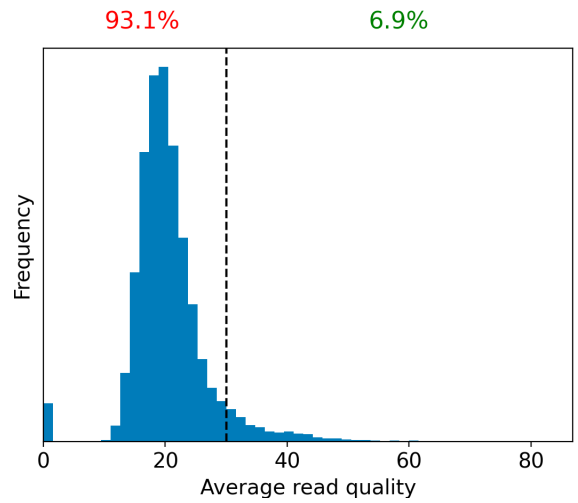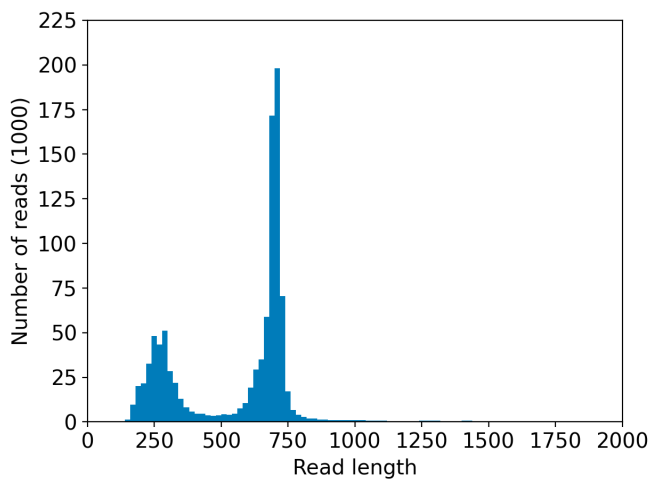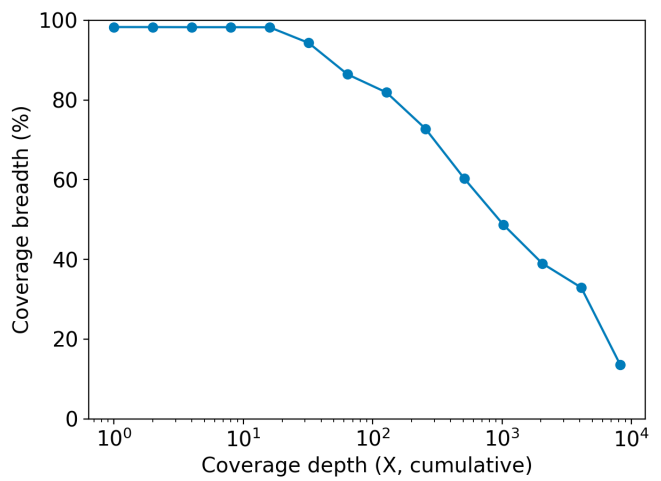

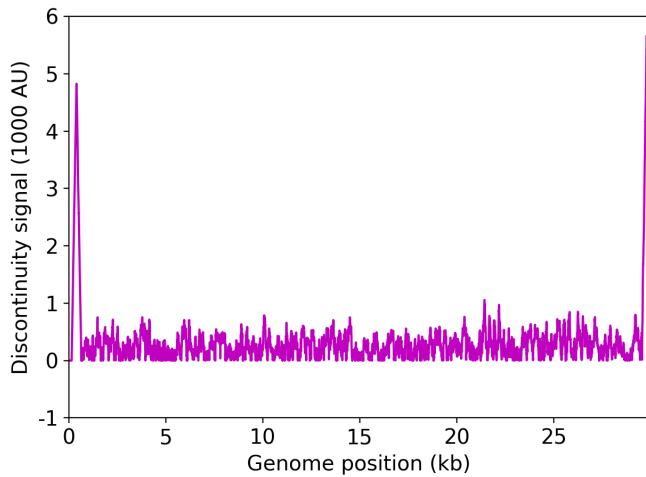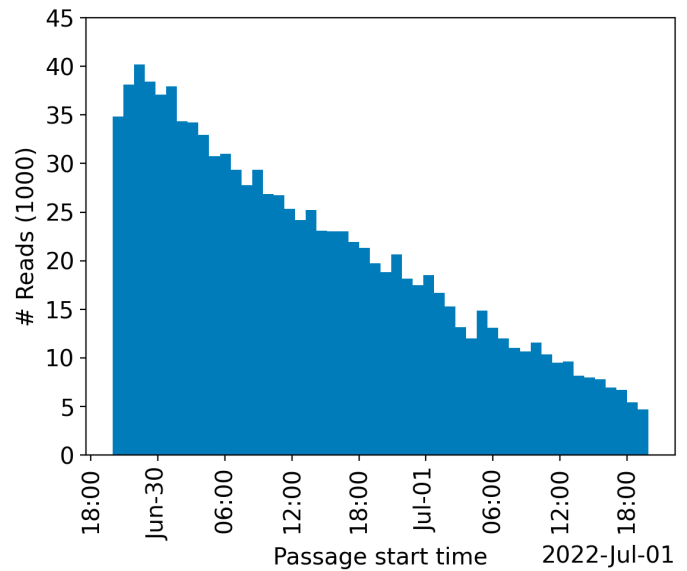

|                                                   | Uncovered coordinates (0X) | Poorly covered coordinates (<10X) |
|---------------------------------------------------|----------------------------|-----------------------------------|
| # Inaccessible genomic coordinates by kit design: | 152nt (0%)                 | 152nt (0%)                        |
| All genomic coordinates:                          | 503nt (1%)                 | 517nt (1%)                        |
| Common SNPs:                                      | 1nt (2%)                   | 1nt (2%)                          |
| Diverse SNPs:                                     | 29nt (12%)                 | 29nt (12%)                        |
| Rare SNPs:                                        | 66nt (7%)                  | 66nt (7%)                         |

SNPs refer to the polymorphic sites currently in circulation that were detected out of recent GISAID entries. The sites that differ from the SC2 reference sequence are denoted as "common" if [90%, 100%] of the submissions carry this mutation, whereas those that are prevalent in [0%,10%] of the submissions are grouped under the "rare" category. The population is still diverse at the mutation sites that are observed in (10%,90%) of the entries and these coordinates are grouped under the "diverse" category.

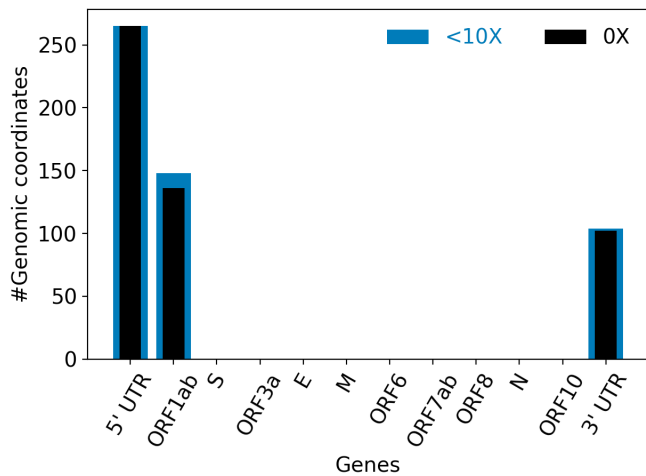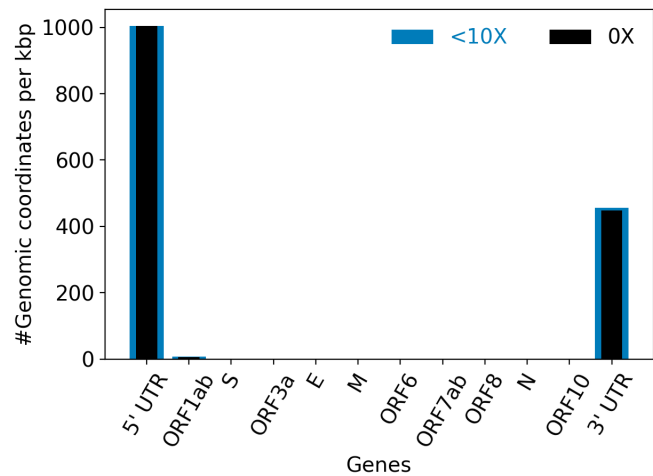

|                                                     |                        |
|-----------------------------------------------------|------------------------|
| Hits to SARS-Cov2 genome (kraken2):                 | 718697 reads (69.25%)  |
| Hits to human genome (kraken2):                     | 10856 reads (1.05%)    |
| Hits to synthetic sequences (kraken2, taxid 28384): | 0 reads (0.00%)        |
|                                                     | Coronaviridae (69.25%) |



Most abundant organisms (kraken2, family level):

Enterobacteriaceae (7.07%)  
Arcobacteraceae (1.61%)  
Hominidae (1.05%)  
Bacteroidaceae (0.14%)

## Detected variants (Experimental)

Abundance of variants by linear regression

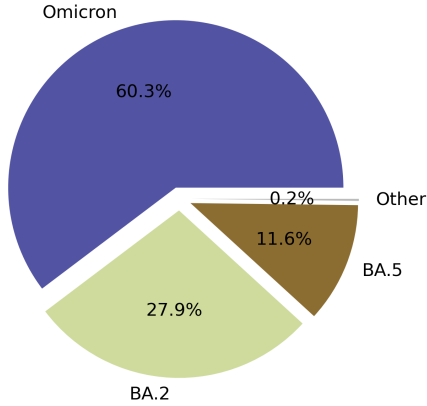

Abundance of variants by kallisto

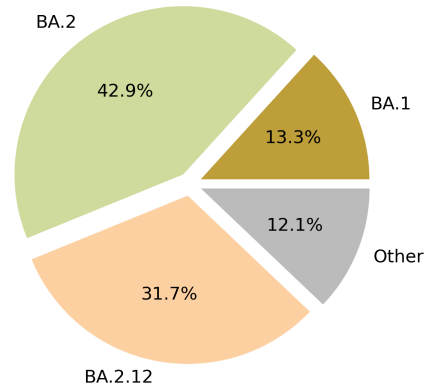

Based on deconvolution, [B.1.1.529](#) is estimated to constitute 60.35% of the viral particles and hence is the most abundant variant in the sample. The  $R^2$  for the linear regression was 0.62. Variants that were detected less than 5% were grouped under "Other"

Based on the consensus sequence of the observed reads, the "ensemble-averaged sequence" most closely resembles the [BA.2](#) lineage. If this is a sample consisting of a single source of pathogens or an overwhelming majority of the different sources are infected with the same variant, the sample is dominated by this variant.

Based on mapping individual reads to the variant consensus sequences in the reference database, kallisto predicts that the sample is dominated by [BA.2](#) lineage. Accuracy of this measure is expected to improve if the input data consists of long reads as opposed to convolution.

Abundance of variants by kraken2+bracken, using majorCovid DB

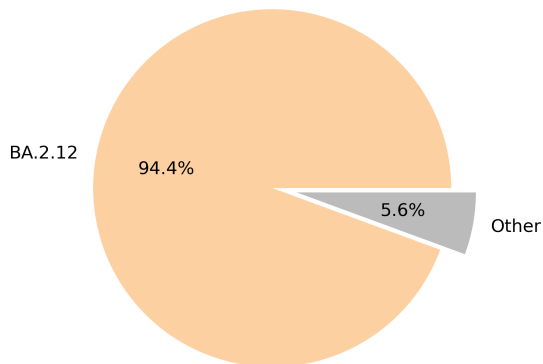

Abundance of variants by Freyja

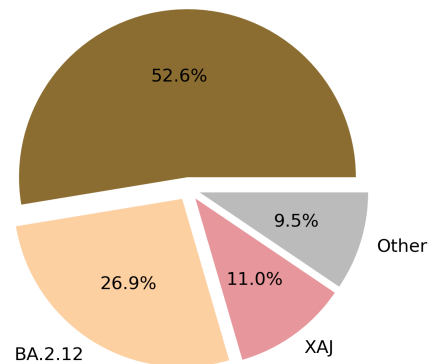

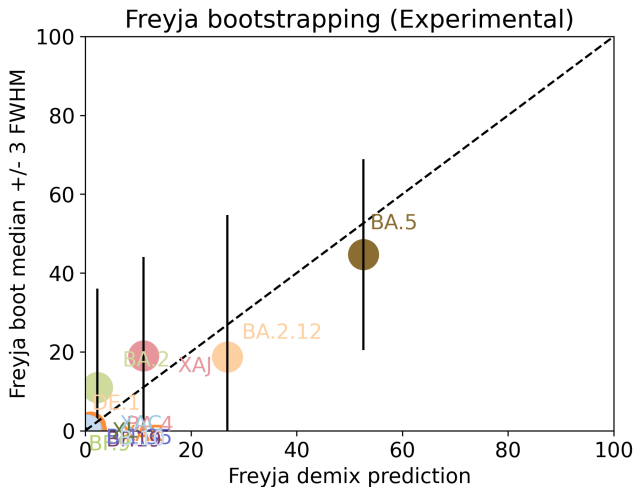

Under the assumption that the presence of a variant requires the detection of all respective mutations of the variant, the characteristic mutations which support the presence of the respective variant are indicated in the respective column of the table. Numbers show the number of mutations detected, if any, and the number of mutations expected to be present based on the variant definitions.

| VOC                               | <a href="#">B.1.617.2</a>                  | <a href="#">BA.1</a>                                                         | <a href="#">BA.2</a>                                                                                                                                                                                                                                                                                                            | <a href="#">BA.3</a>                                                                                                                                                 | <a href="#">BA.4</a>                                                                                                                                                                                                                                                                       | <a href="#">BA.5</a>                                                                                                                                                                                                                                                                 |
|-----------------------------------|--------------------------------------------|------------------------------------------------------------------------------|---------------------------------------------------------------------------------------------------------------------------------------------------------------------------------------------------------------------------------------------------------------------------------------------------------------------------------|----------------------------------------------------------------------------------------------------------------------------------------------------------------------|--------------------------------------------------------------------------------------------------------------------------------------------------------------------------------------------------------------------------------------------------------------------------------------------|--------------------------------------------------------------------------------------------------------------------------------------------------------------------------------------------------------------------------------------------------------------------------------------|
| Characteristic mutations detected | (3 of 13)<br>S:G142D<br>S:L452R<br>S:T478K | (5 of 26)<br>M:D3G<br>NUC:C25000T<br>NUC:C25584T<br>ORF1AB:I3758V<br>S:Q493R | (22 of 31)<br>N:S413R<br>NUC:A9424G<br>NUC:C10198T<br>NUC:C12880T<br>NUC:C15714T<br>NUC:C25000T<br>NUC:C25584T<br>NUC:C26858T<br>NUC:C4321T<br>NUC:G10447A<br>ORF1AB:G1307S<br>ORF1AB:L3027F<br>ORF1AB:L3201F<br>ORF1AB:S135R<br>ORF1AB:T3090I<br>ORF1AB:T842I<br>S:D405N<br>S:Q493R<br>S:R408S<br>S:S371F<br>S:T19I<br>S:T376A | (11 of 21)<br>N:S413R<br>NUC:C12880T<br>NUC:C15714T<br>NUC:C26858T<br>NUC:G10447A<br>ORF1AB:G1307S<br>ORF1AB:S135R<br>ORF1AB:T3090I<br>S:D405N<br>S:Q493R<br>S:S371F | (20 of 31)<br>N:S413R<br>NUC:C10198T<br>NUC:C12880T<br>NUC:C15714T<br>NUC:C25000T<br>NUC:C25584T<br>NUC:C26858T<br>NUC:C4321T<br>NUC:G10447A<br>ORF1AB:G1307S<br>ORF1AB:S135R<br>ORF1AB:T3090I<br>ORF1AB:T842I<br>S:D405N<br>S:F486V<br>S:L452R<br>S:S371F<br>S:T19I<br>S:T376A<br>S:V213G | (20 of 28)<br>M:D3N<br>N:S413R<br>NUC:C10198T<br>NUC:C12880T<br>NUC:C15714T<br>NUC:C25000T<br>NUC:C25584T<br>NUC:C4321T<br>NUC:G10447A<br>ORF1AB:G1307S<br>ORF1AB:S135R<br>ORF1AB:T3090I<br>ORF1AB:T842I<br>S:D405N<br>S:F486V<br>S:L452R<br>S:S371F<br>S:T19I<br>S:T376A<br>S:V213G |

**Jaccard Index** is a measure of similarity between two sets A and B, reaching the maximum value of 1 if A=B and minimum value of 0 if  $A \cap B = \{\}$ . In the c(d) representation below, c represents the Jaccard index of the set of mutations that were experimentally detected for this sample as listed above, whereas d refers to the ideal value of the Jaccard index expected from complete genome coverage without any sequencing errors.

|                           | <a href="#">B.1.617.2</a>     | <a href="#">BA.1</a>          | <a href="#">BA.2</a>          | <a href="#">BA.3</a>          | <a href="#">BA.4</a>          | <a href="#">BA.5</a>          |
|---------------------------|-------------------------------|-------------------------------|-------------------------------|-------------------------------|-------------------------------|-------------------------------|
| <a href="#">B.1.617.2</a> | 1.00 ( <a href="#">1.00</a> ) | 0.00 ( <a href="#">0.00</a> ) | 0.00 ( <a href="#">0.00</a> ) | 0.00 ( <a href="#">0.00</a> ) | 0.05 ( <a href="#">0.02</a> ) | 0.05 ( <a href="#">0.03</a> ) |
| <a href="#">BA.1</a>      | 0.00 ( <a href="#">0.00</a> ) | 1.00 ( <a href="#">1.00</a> ) | 0.12 ( <a href="#">0.10</a> ) | 0.07 ( <a href="#">0.21</a> ) | 0.09 ( <a href="#">0.08</a> ) | 0.09 ( <a href="#">0.08</a> ) |
| <a href="#">BA.2</a>      | 0.00 ( <a href="#">0.00</a> ) | 0.12 ( <a href="#">0.10</a> ) | 1.00 ( <a href="#">1.00</a> ) | 0.50 ( <a href="#">0.33</a> ) | 0.68 ( <a href="#">0.63</a> ) | 0.62 ( <a href="#">0.59</a> ) |
| <a href="#">BA.3</a>      | 0.00 ( <a href="#">0.00</a> ) | 0.07 ( <a href="#">0.21</a> ) | 0.50 ( <a href="#">0.33</a> ) | 1.00 ( <a href="#">1.00</a> ) | 0.48 ( <a href="#">0.30</a> ) | 0.41 ( <a href="#">0.29</a> ) |
| <a href="#">BA.4</a>      | 0.05 ( <a href="#">0.02</a> ) | 0.09 ( <a href="#">0.08</a> ) | 0.68 ( <a href="#">0.63</a> ) | 0.48 ( <a href="#">0.30</a> ) | 1.00 ( <a href="#">1.00</a> ) | 0.90 ( <a href="#">0.84</a> ) |

BA.5

0.05 ([0.03](#))

0.09 ([0.08](#))

0.62 ([0.59](#))

0.41 ([0.29](#))

0.90 ([0.84](#))

1.00 ([1.00](#))

## Detected mutations

Excluded from this pdf version due to file size limitations.

**CFSAN/OAO**  
**BIostatistics AND Bioinformatics Staff**

# WASTEWATER SARS-COV2 ANALYSIS REPORT

|                                  |                                                                                                              |
|----------------------------------|--------------------------------------------------------------------------------------------------------------|
| Sample name:                     | CFSANSMP000119229                                                                                            |
| Date generated:                  | 2023-02-02, 09:06:51 EST                                                                                     |
| Timestamp of C-WAP version used: | Tue Jan 31 11:49:22 2023 -0500                                                                               |
| Executed by:                     | Jasmine Amirzadegan ( <a href="mailto:Jasmine.Amirzadegan@fda.hhs.gov">Jasmine.Amirzadegan@fda.hhs.gov</a> ) |
| Executed on:                     | 172.20.44.123 (aka n123.raven.cfsan)                                                                         |

## Sequencing summary

|                                      |                               |
|--------------------------------------|-------------------------------|
| Sequencing chemistry:                | Missing with Missing          |
| Source site:                         | <a href="#">Missing (?.?)</a> |
| Sampling date:                       | Missing                       |
| Collected by:                        | Missing                       |
| Sequenced by:                        | Missing                       |
| Total number of reads:               | 1172436                       |
| Reads aligned:                       | 794591 (67%)                  |
| Average read quality:                | 19.7                          |
| Average read length:                 | 676                           |
| Reads passing filter:                | 794585 (67%)                  |
| Average read quality passing filter: | 19.7                          |
| Average read length passing filter:  | 676                           |
| Average coverage passing filter:     | 17962X                        |

A read passes filter if the read length after adaptor trimming  $\geq 30$  and minimum read quality  $\geq 20$  within a sliding window of width 4.

## Overall sequence characteristics

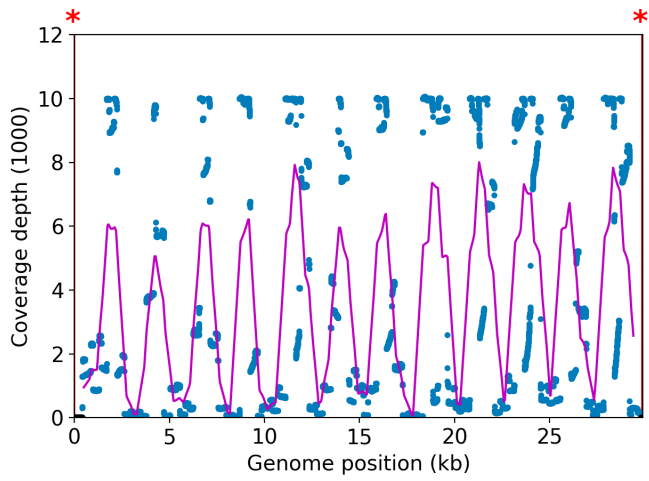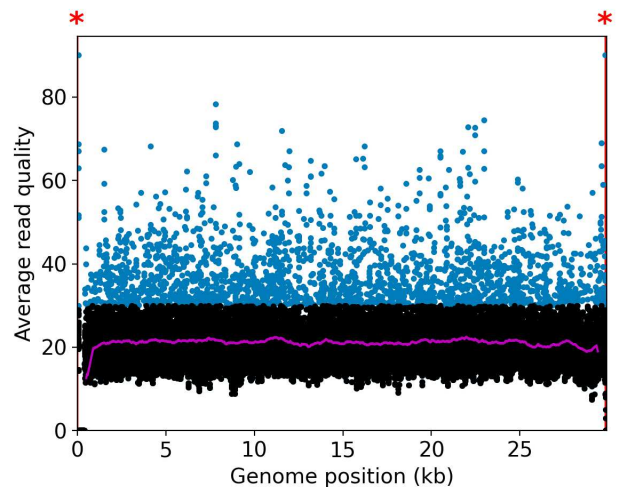

NOTE: The red shaded areas marked with a (\*) are not covered by the design of the library preparation kit and hence excluded from analyses. Magenta curves represent moving average with a window width of 1kb.

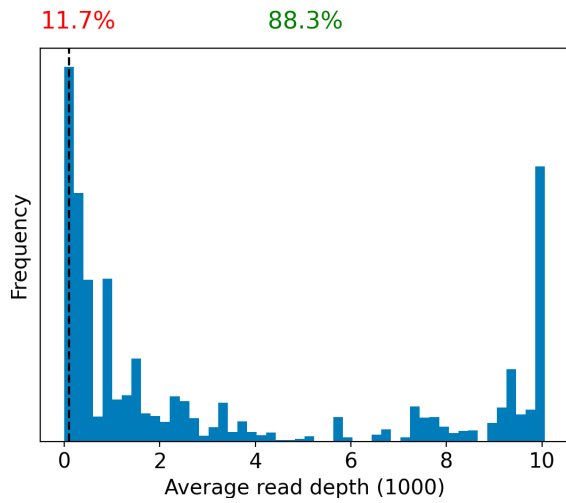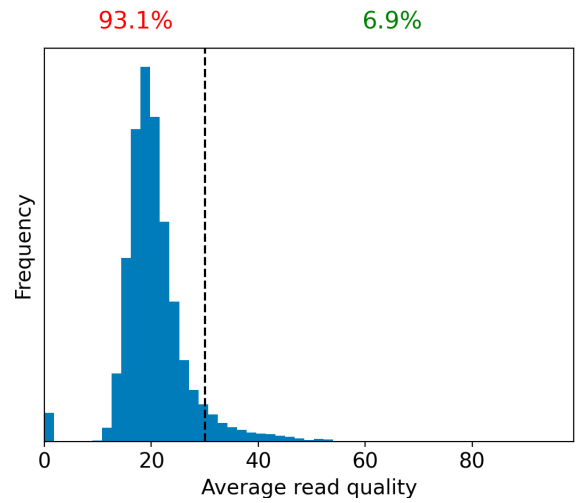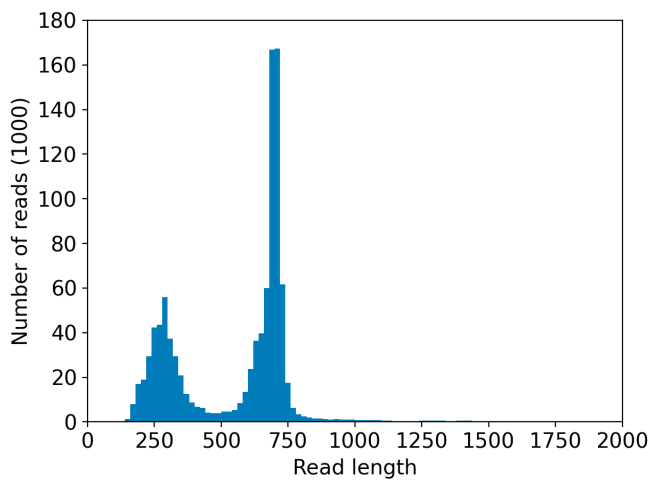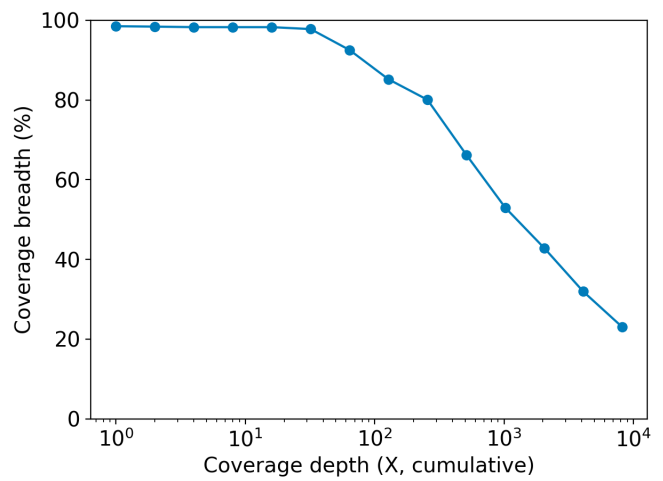

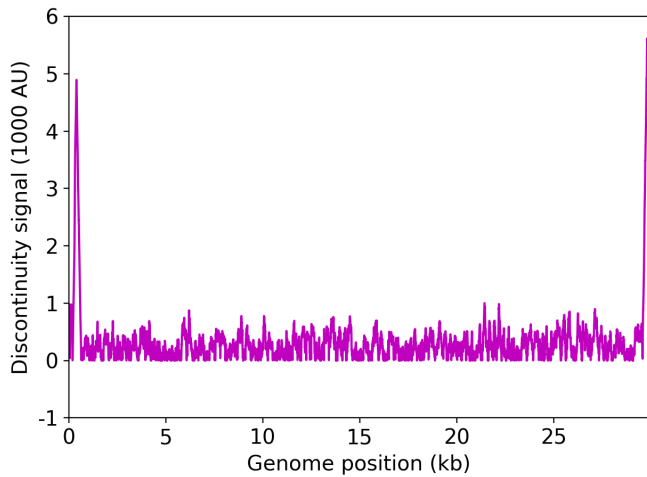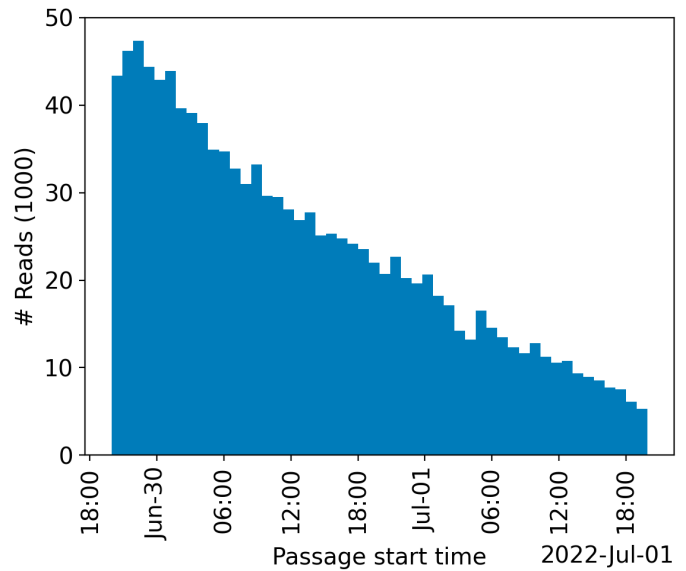

|                                                   | Uncovered coordinates (0X) | Poorly covered coordinates (<10X) |
|---------------------------------------------------|----------------------------|-----------------------------------|
| # Inaccessible genomic coordinates by kit design: | 152nt (0%)                 | 152nt (0%)                        |
| All genomic coordinates:                          | 441nt (1%)                 | 511nt (1%)                        |
| Common SNPs:                                      | 1nt (2%)                   | 1nt (2%)                          |
| Diverse SNPs:                                     | 29nt (12%)                 | 29nt (12%)                        |
| Rare SNPs:                                        | 60nt (6%)                  | 66nt (7%)                         |

SNPs refer to the polymorphic sites currently in circulation that were detected out of recent GISAID entries. The sites that differ from the SC2 reference sequence are denoted as "common" if [90%, 100%] of the submissions carry this mutation, whereas those that are prevalent in [0%,10%] of the submissions are grouped under the "rare" category. The population is still diverse at the mutation sites that are observed in (10%,90%) of the entries and these coordinates are grouped under the "diverse" category.

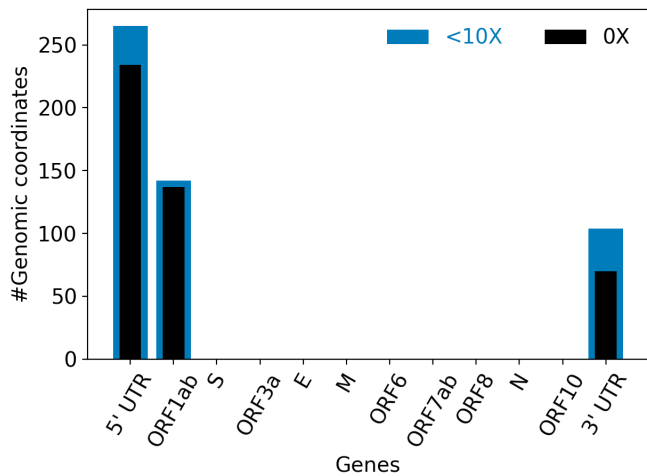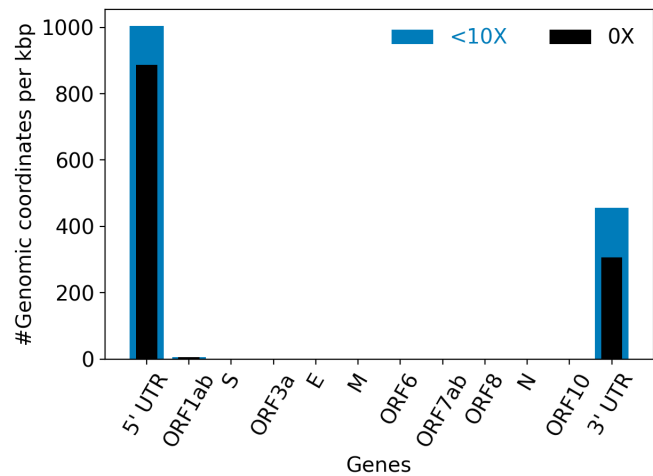

|                                                     |                        |
|-----------------------------------------------------|------------------------|
| Hits to SARS-Cov2 genome (kraken2):                 | 788012 reads (67.21%)  |
| Hits to human genome (kraken2):                     | 13118 reads (1.12%)    |
| Hits to synthetic sequences (kraken2, taxid 28384): | 0 reads (0.00%)        |
|                                                     | Coronaviridae (67.21%) |

Most abundant organisms (kraken2, family level):

Arcobacteraceae (1.57%)  
Hominidae (1.12%)  
Enterobacteriaceae (0.40%)  
Comamonadaceae (0.30%)

## Detected variants (Experimental)

Abundance of variants by linear regression  
Omicron

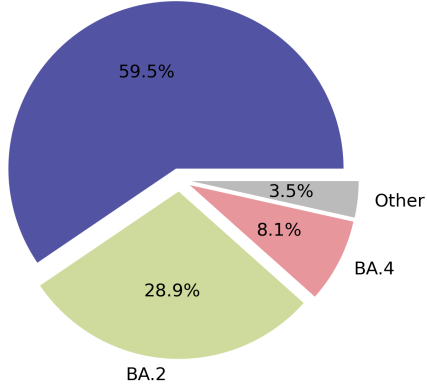

Abundance of variants by kallisto

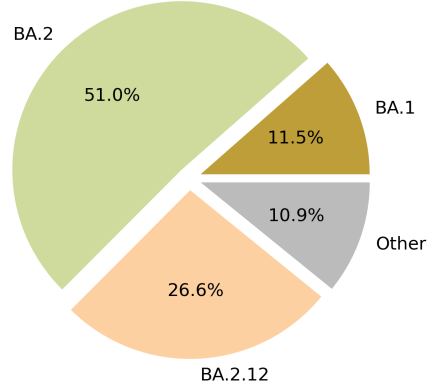

Based on deconvolution, [B.1.1.529](#) is estimated to constitute 59.49% of the viral particles and hence is the most abundant variant in the sample. The  $R^2$  for the linear regression was 0.63. Variants that were detected less than 5% were grouped under "Other"

Based on the consensus sequence of the observed reads, the "ensemble-averaged sequence" most closely resembles the [BA.2](#) lineage. If this is a sample consisting of a single source of pathogens or an overwhelming majority of the different sources are infected with the same variant, the sample is dominated by this variant.

Based on mapping individual reads to the variant consensus sequences in the reference database, kallisto predicts that the sample is dominated by [BA.2](#) lineage. Accuracy of this measure is expected to improve if the input data consists of long reads as opposed to convolution.

Abundance of variants by kraken2+bracken, using majorCovid DB

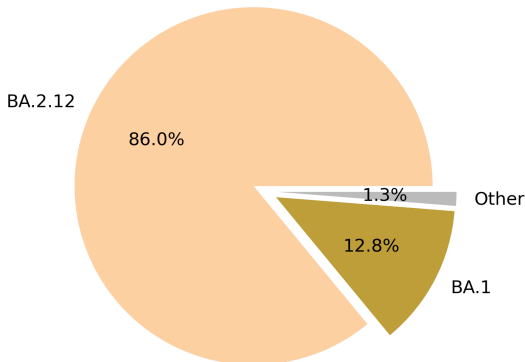

Abundance of variants by Freyja

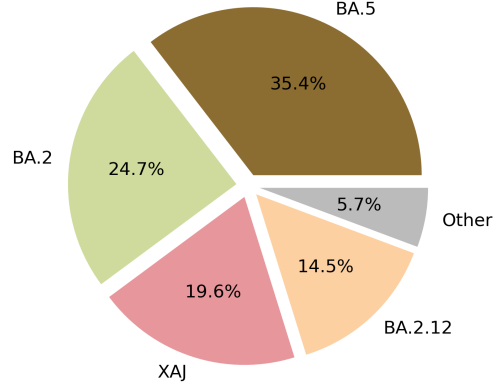

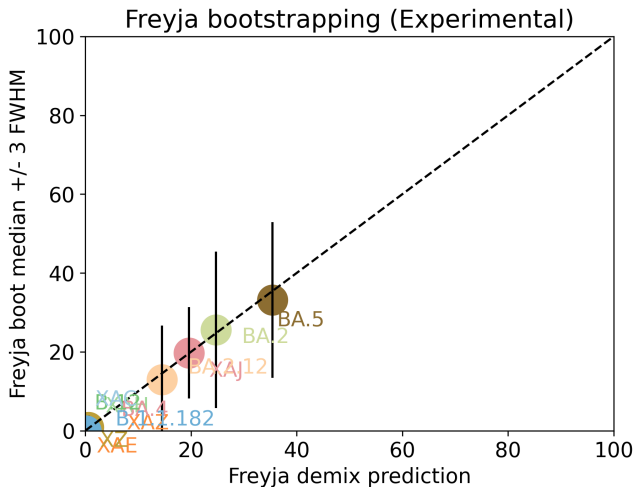

Under the assumption that the presence of a variant requires the detection of all respective mutations of the variant, the characteristic mutations which support the presence of the respective variant are indicated in the respective column of the table. Numbers show the number of mutations detected, if any, and the number of mutations expected to be present based on the variant definitions.

| VOC                               | <a href="#">B.1.617.2</a>                  | <a href="#">BA.1</a>                                                         | <a href="#">BA.2</a>                                                                                                                                                                                                                                                                                                                | <a href="#">BA.3</a>                                                                                                                                                 | <a href="#">BA.4</a>                                                                                                                                                                                                                                                                                                     | <a href="#">BA.5</a>                                                                                                                                                                                                                                                                       |
|-----------------------------------|--------------------------------------------|------------------------------------------------------------------------------|-------------------------------------------------------------------------------------------------------------------------------------------------------------------------------------------------------------------------------------------------------------------------------------------------------------------------------------|----------------------------------------------------------------------------------------------------------------------------------------------------------------------|--------------------------------------------------------------------------------------------------------------------------------------------------------------------------------------------------------------------------------------------------------------------------------------------------------------------------|--------------------------------------------------------------------------------------------------------------------------------------------------------------------------------------------------------------------------------------------------------------------------------------------|
| Characteristic mutations detected | (3 of 13)<br>S:G142D<br>S:L452R<br>S:T478K | (5 of 26)<br>M:D3G<br>NUC:C25000T<br>NUC:C25584T<br>ORF1AB:I3758V<br>S:Q493R | (23 of 31)<br>N:S413R<br>NUC:A20055G<br>NUC:A9424G<br>NUC:C10198T<br>NUC:C12880T<br>NUC:C15714T<br>NUC:C25000T<br>NUC:C25584T<br>NUC:C26858T<br>NUC:C4321T<br>NUC:G10447A<br>ORF1AB:G1307S<br>ORF1AB:L3027F<br>ORF1AB:L3201F<br>ORF1AB:S135R<br>ORF1AB:T3090I<br>ORF1AB:T842I<br>S:D405N<br>S:Q493R<br>S:S371F<br>S:T19I<br>S:T376A | (11 of 21)<br>N:S413R<br>NUC:C12880T<br>NUC:C15714T<br>NUC:C26858T<br>NUC:G10447A<br>ORF1AB:G1307S<br>ORF1AB:S135R<br>ORF1AB:T3090I<br>S:D405N<br>S:Q493R<br>S:S371F | (22 of 31)<br>N:S413R<br>NUC:A20055G<br>NUC:C10198T<br>NUC:C12880T<br>NUC:C15714T<br>NUC:C25000T<br>NUC:C25584T<br>NUC:C26858T<br>NUC:C4321T<br>NUC:G10447A<br>NUC:G27788T<br>ORF1AB:G1307S<br>ORF1AB:S135R<br>ORF1AB:T3090I<br>ORF1AB:T842I<br>S:D405N<br>S:F486V<br>S:L452R<br>S:S371F<br>S:T19I<br>S:T376A<br>S:V213G | (20 of 28)<br>N:S413R<br>NUC:A20055G<br>NUC:C10198T<br>NUC:C12880T<br>NUC:C15714T<br>NUC:C25000T<br>NUC:C25584T<br>NUC:C4321T<br>NUC:G10447A<br>ORF1AB:G1307S<br>ORF1AB:S135R<br>ORF1AB:T3090I<br>ORF1AB:T842I<br>S:D405N<br>S:F486V<br>S:L452R<br>S:S371F<br>S:T19I<br>S:T376A<br>S:V213G |

[Jaccard Index](#) is a measure of similarity between two sets A and B, reaching the maximum value of 1 if  $A=B$  and minimum value of 0 if  $A \cap B = \{\}$ . In the c(d) representation below, c represents the Jaccard index of the set of mutations that were experimentally detected for this sample as listed above, whereas d refers to the ideal value of the Jaccard index expected from complete genome coverage without any sequencing errors.

|                           | <a href="#">B.1.617.2</a>     | <a href="#">BA.1</a>          | <a href="#">BA.2</a>          | <a href="#">BA.3</a>          | <a href="#">BA.4</a>          | <a href="#">BA.5</a>          |
|---------------------------|-------------------------------|-------------------------------|-------------------------------|-------------------------------|-------------------------------|-------------------------------|
| <a href="#">B.1.617.2</a> | 1.00 ( <a href="#">1.00</a> ) | 0.00 ( <a href="#">0.00</a> ) | 0.00 ( <a href="#">0.00</a> ) | 0.00 ( <a href="#">0.00</a> ) | 0.04 ( <a href="#">0.02</a> ) | 0.05 ( <a href="#">0.03</a> ) |
| <a href="#">BA.1</a>      | 0.00 ( <a href="#">0.00</a> ) | 1.00 ( <a href="#">1.00</a> ) | 0.12 ( <a href="#">0.10</a> ) | 0.07 ( <a href="#">0.21</a> ) | 0.08 ( <a href="#">0.08</a> ) | 0.09 ( <a href="#">0.08</a> ) |
| <a href="#">BA.2</a>      | 0.00 ( <a href="#">0.00</a> ) | 0.12 ( <a href="#">0.10</a> ) | 1.00 ( <a href="#">1.00</a> ) | 0.48 ( <a href="#">0.33</a> ) | 0.67 ( <a href="#">0.63</a> ) | 0.65 ( <a href="#">0.59</a> ) |
| <a href="#">BA.3</a>      | 0.00 ( <a href="#">0.00</a> ) | 0.07 ( <a href="#">0.21</a> ) | 0.48 ( <a href="#">0.33</a> ) | 1.00 ( <a href="#">1.00</a> ) | 0.43 ( <a href="#">0.30</a> ) | 0.41 ( <a href="#">0.29</a> ) |
| <a href="#">BA.4</a>      | 0.04 ( <a href="#">0.02</a> ) | 0.08 ( <a href="#">0.08</a> ) | 0.67 ( <a href="#">0.63</a> ) | 0.43 ( <a href="#">0.30</a> ) | 1.00 ( <a href="#">1.00</a> ) | 0.91 ( <a href="#">0.84</a> ) |



BA.5

0.05 ([0.03](#))

0.09 ([0.08](#))

0.65 ([0.59](#))

0.41 ([0.29](#))

0.91 ([0.84](#))

1.00 ([1.00](#))

## Detected mutations

Excluded from this pdf version due to file size limitations.

**CFSAN/OAO**  
**BIostatistics AND Bioinformatics Staff**

# WASTEWATER SARS-COV2 ANALYSIS REPORT

|                                  |                                                                                                              |
|----------------------------------|--------------------------------------------------------------------------------------------------------------|
| Sample name:                     | CFSANSMP000119231                                                                                            |
| Date generated:                  | 2023-02-02, 09:10:35 EST                                                                                     |
| Timestamp of C-WAP version used: | Tue Jan 31 11:49:22 2023 -0500                                                                               |
| Executed by:                     | Jasmine Amirzadegan ( <a href="mailto:Jasmine.Amirzadegan@fda.hhs.gov">Jasmine.Amirzadegan@fda.hhs.gov</a> ) |
| Executed on:                     | 172.20.44.125 (aka n125.raven.cfsan)                                                                         |

## Sequencing summary

|                                      |                               |
|--------------------------------------|-------------------------------|
| Sequencing chemistry:                | Missing with Missing          |
| Source site:                         | <a href="#">Missing (?.?)</a> |
| Sampling date:                       | Missing                       |
| Collected by:                        | Missing                       |
| Sequenced by:                        | Missing                       |
| Total number of reads:               | 1298984                       |
| Reads aligned:                       | 1166949 (89%)                 |
| Average read quality:                | 20.0                          |
| Average read length:                 | 684                           |
| Reads passing filter:                | 1166947 (89%)                 |
| Average read quality passing filter: | 20.0                          |
| Average read length passing filter:  | 684                           |
| Average coverage passing filter:     | 26692X                        |

A read passes filter if the read length after adaptor trimming  $\geq 30$  and minimum read quality  $\geq 20$  within a sliding window of width 4.

## Overall sequence characteristics

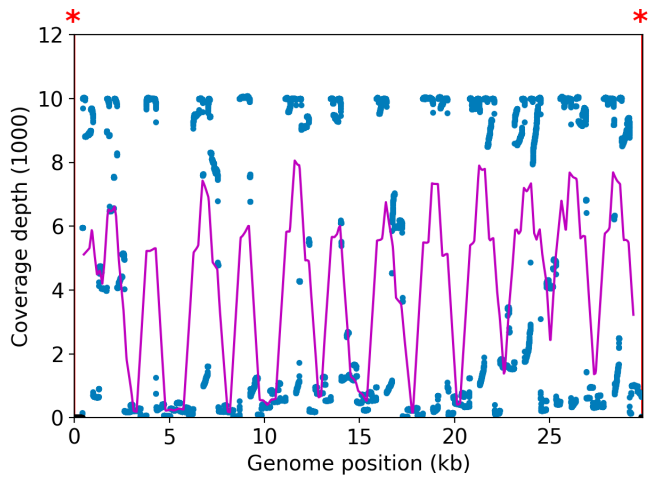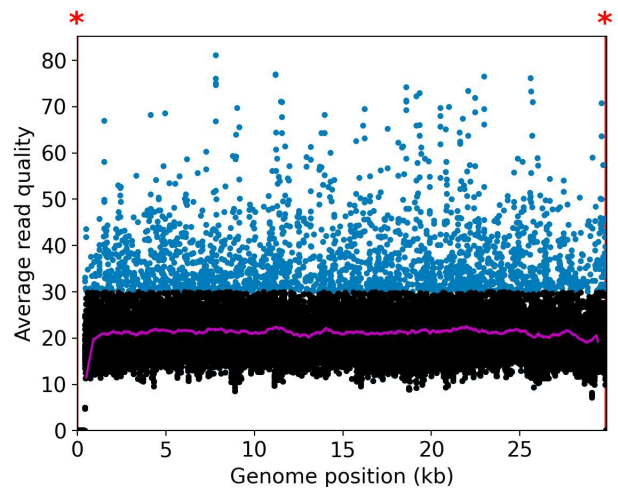

NOTE: The red shaded areas marked with a (\*) are not covered by the design of the library preparation kit and hence excluded from analyses. Magenta curves represent moving average with a window width of 1kb.

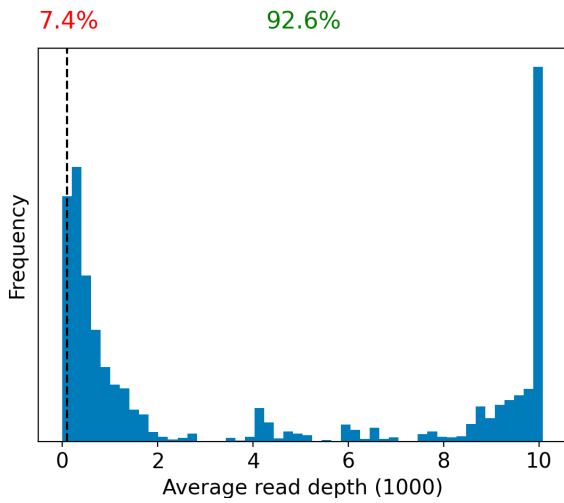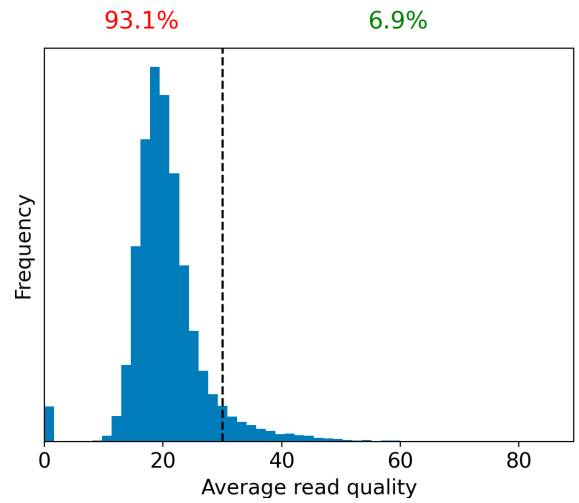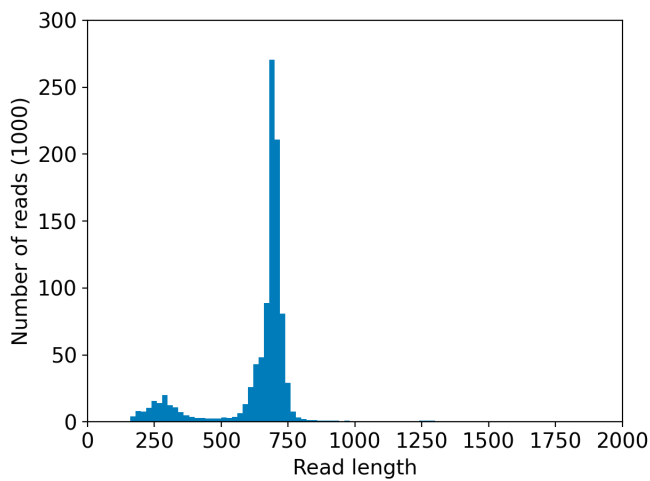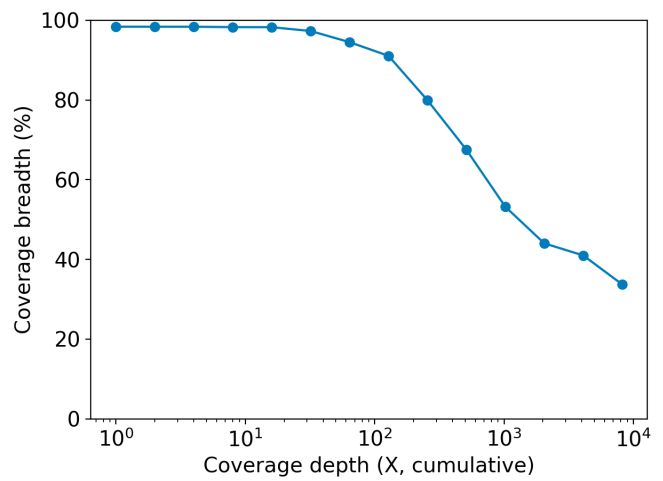

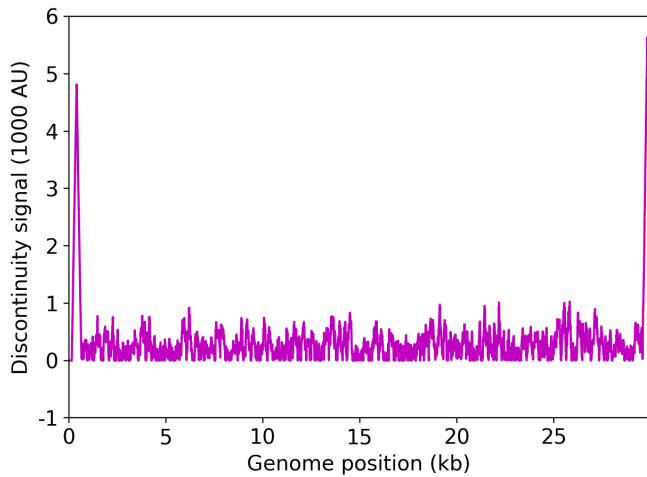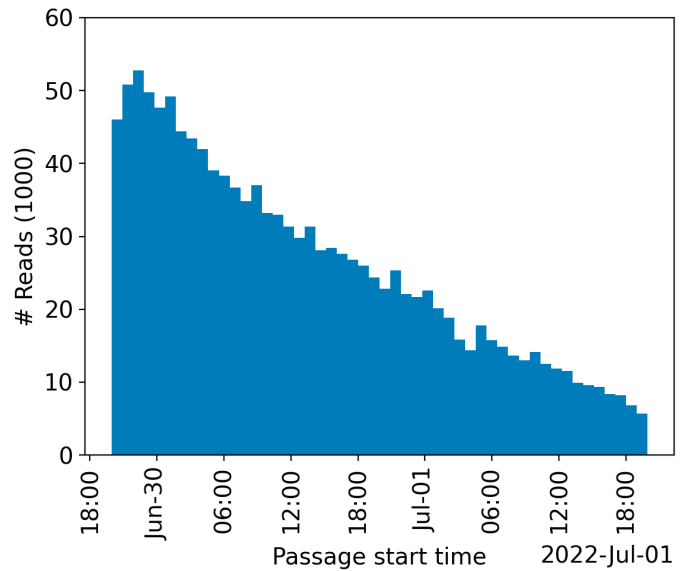

|                                                   | Uncovered coordinates (0X) | Poorly covered coordinates (<10X) |
|---------------------------------------------------|----------------------------|-----------------------------------|
| # Inaccessible genomic coordinates by kit design: | 152nt (0%)                 | 152nt (0%)                        |
| All genomic coordinates:                          | 477nt (1%)                 | 512nt (1%)                        |
| Common SNPs:                                      | 1nt (2%)                   | 1nt (2%)                          |
| Diverse SNPs:                                     | 29nt (12%)                 | 29nt (12%)                        |
| Rare SNPs:                                        | 60nt (6%)                  | 66nt (7%)                         |

SNPs refer to the polymorphic sites currently in circulation that were detected out of recent GISAID entries. The sites that differ from the SC2 reference sequence are denoted as "common" if [90%, 100%] of the submissions carry this mutation, whereas those that are prevalent in [0%,10%] of the submissions are grouped under the "rare" category. The population is still diverse at the mutation sites that are observed in (10%,90%) of the entries and these coordinates are grouped under the "diverse" category.

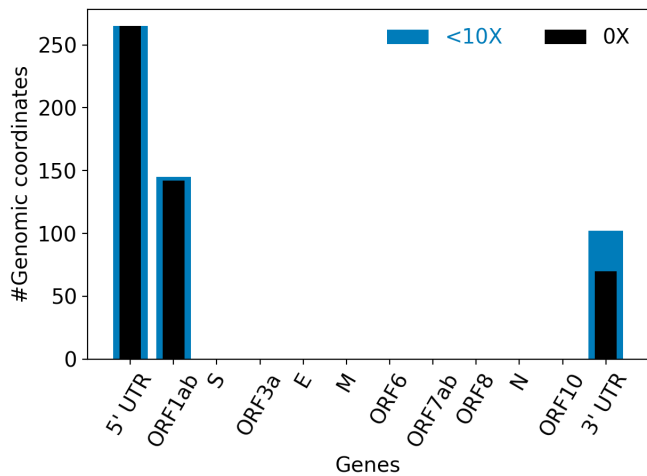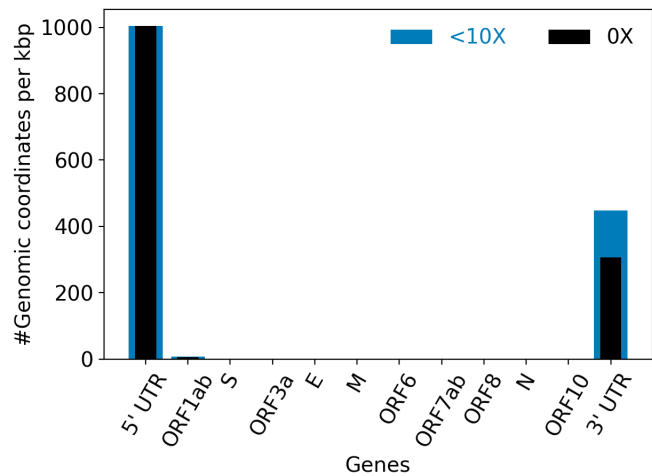

|                                                     |                        |
|-----------------------------------------------------|------------------------|
| Hits to SARS-Cov2 genome (kraken2):                 | 1157571 reads (89.11%) |
| Hits to human genome (kraken2):                     | 8174 reads (0.63%)     |
| Hits to synthetic sequences (kraken2, taxid 28384): | 0 reads (0.00%)        |
|                                                     | Coronaviridae (89.11%) |

Most abundant organisms (kraken2, family level):

Hominidae (0.63%)  
Arcobacteraceae (0.48%)  
Enterobacteriaceae (0.12%)  
Bacteroidaceae (0.04%)

## Detected variants (Experimental)

Abundance of variants by linear regression  
Omicron

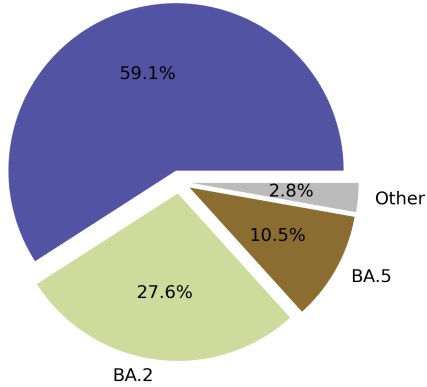

Abundance of variants by kallisto

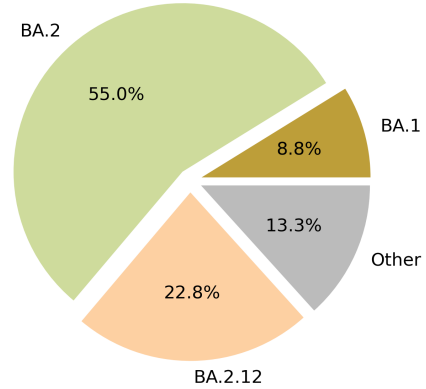

Based on deconvolution, [B.1.1.529](#) is estimated to constitute 59.11% of the viral particles and hence is the most abundant variant in the sample. The  $R^2$  for the linear regression was 0.62. Variants that were detected less than 5% were grouped under "Other"

Based on the consensus sequence of the observed reads, the "ensemble-averaged sequence" most closely resembles the [BA.2](#) lineage. If this is a sample consisting of a single source of pathogens or an overwhelming majority of the different sources are infected with the same variant, the sample is dominated by this variant.

Based on mapping individual reads to the variant consensus sequences in the reference database, kallisto predicts that the sample is dominated by [BA.2](#) lineage. Accuracy of this measure is expected to improve if the input data consists of long reads as opposed to convolution.

Abundance of variants by kraken2+bracken, using majorCovid DB

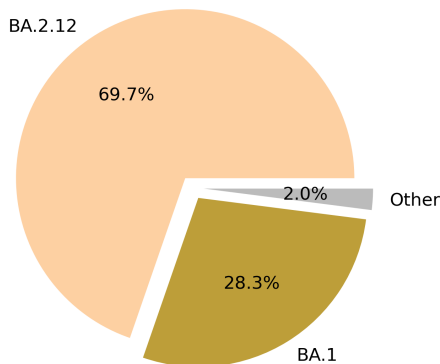

Abundance of variants by Freyja  
BA.5

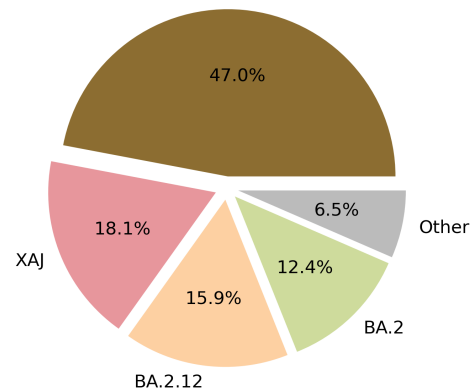

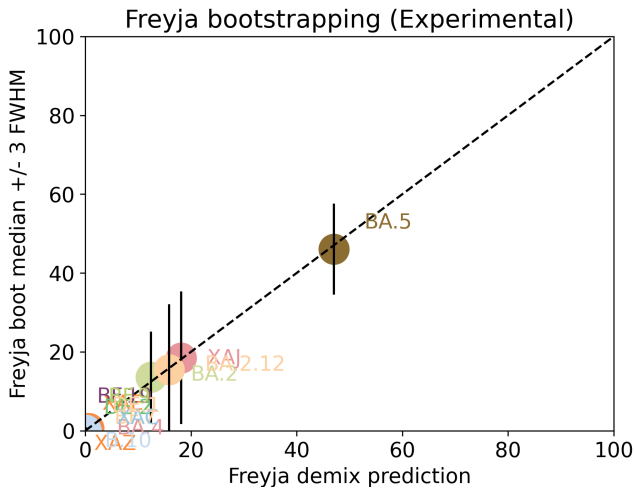

Under the assumption that the presence of a variant requires the detection of all respective mutations of the variant, the characteristic mutations which support the presence of the respective variant are indicated in the respective column of the table. Numbers show the number of mutations detected, if any, and the number of mutations expected to be present based on the variant definitions.

| VOC                               | <a href="#">B.1.617.2</a>                  | <a href="#">BA.1</a>                                                         | <a href="#">BA.2</a>                                                                                                                                                                                                                                                                                                                           | <a href="#">BA.3</a>                                                                                                                                                 | <a href="#">BA.4</a>                                                                                                                                                                                                                                                                                                     | <a href="#">BA.5</a>                                                                                                                                                                                                                                                                                |
|-----------------------------------|--------------------------------------------|------------------------------------------------------------------------------|------------------------------------------------------------------------------------------------------------------------------------------------------------------------------------------------------------------------------------------------------------------------------------------------------------------------------------------------|----------------------------------------------------------------------------------------------------------------------------------------------------------------------|--------------------------------------------------------------------------------------------------------------------------------------------------------------------------------------------------------------------------------------------------------------------------------------------------------------------------|-----------------------------------------------------------------------------------------------------------------------------------------------------------------------------------------------------------------------------------------------------------------------------------------------------|
| Characteristic mutations detected | (3 of 13)<br>S:G142D<br>S:L452R<br>S:T478K | (5 of 26)<br>M:D3G<br>NUC:C25000T<br>NUC:C25584T<br>ORF1AB:I3758V<br>S:Q493R | (23 of 31)<br>N:S413R<br>NUC:A20055G<br>NUC:A9424G<br>NUC:C10198T<br>NUC:C12880T<br>NUC:C15714T<br>NUC:C25000T<br>NUC:C25584T<br>NUC:C26858T<br>NUC:C4321T<br>NUC:G10447A<br>ORF1AB:G1307S<br>ORF1AB:L3027F<br>ORF1AB:L3201F<br>ORF1AB:S135R<br>ORF1AB:T3090I<br>ORF1AB:T842I<br>S:D405N<br>S:Q493R<br>S:R408S<br>S:S371F<br>S:T19I<br>S:T376A | (11 of 21)<br>N:S413R<br>NUC:C12880T<br>NUC:C15714T<br>NUC:C26858T<br>NUC:G10447A<br>ORF1AB:G1307S<br>ORF1AB:S135R<br>ORF1AB:T3090I<br>S:D405N<br>S:Q493R<br>S:S371F | (22 of 31)<br>N:S413R<br>NUC:A20055G<br>NUC:C10198T<br>NUC:C12880T<br>NUC:C15714T<br>NUC:C25000T<br>NUC:C25584T<br>NUC:C26858T<br>NUC:C4321T<br>NUC:G10447A<br>NUC:G27788T<br>ORF1AB:G1307S<br>ORF1AB:S135R<br>ORF1AB:T3090I<br>ORF1AB:T842I<br>S:D405N<br>S:F486V<br>S:L452R<br>S:S371F<br>S:T19I<br>S:T376A<br>S:V213G | (21 of 28)<br>M:D3N<br>N:S413R<br>NUC:A20055G<br>NUC:C10198T<br>NUC:C12880T<br>NUC:C15714T<br>NUC:C25000T<br>NUC:C25584T<br>NUC:C4321T<br>NUC:G10447A<br>ORF1AB:G1307S<br>ORF1AB:S135R<br>ORF1AB:T3090I<br>ORF1AB:T842I<br>S:D405N<br>S:F486V<br>S:L452R<br>S:S371F<br>S:T19I<br>S:T376A<br>S:V213G |

[Jaccard Index](#) is a measure of similarity between two sets A and B, reaching the maximum value of 1 if A=B and minimum value of 0 if  $A \cap B = \{\}$ . In the c(d) representation below, c represents the Jaccard index of the set of mutations that were experimentally detected for this sample as listed above, whereas d refers to the ideal value of the Jaccard index expected from complete genome coverage without any sequencing errors.

|                           | <a href="#">B.1.617.2</a>     | <a href="#">BA.1</a>          | <a href="#">BA.2</a>          | <a href="#">BA.3</a>          | <a href="#">BA.4</a>          | <a href="#">BA.5</a>          |
|---------------------------|-------------------------------|-------------------------------|-------------------------------|-------------------------------|-------------------------------|-------------------------------|
| <a href="#">B.1.617.2</a> | 1.00 ( <a href="#">1.00</a> ) | 0.00 ( <a href="#">0.00</a> ) | 0.00 ( <a href="#">0.00</a> ) | 0.00 ( <a href="#">0.00</a> ) | 0.04 ( <a href="#">0.02</a> ) | 0.04 ( <a href="#">0.03</a> ) |
| <a href="#">BA.1</a>      | 0.00 ( <a href="#">0.00</a> ) | 1.00 ( <a href="#">1.00</a> ) | 0.12 ( <a href="#">0.10</a> ) | 0.07 ( <a href="#">0.21</a> ) | 0.08 ( <a href="#">0.08</a> ) | 0.08 ( <a href="#">0.08</a> ) |
| <a href="#">BA.2</a>      | 0.00 ( <a href="#">0.00</a> ) | 0.12 ( <a href="#">0.10</a> ) | 1.00 ( <a href="#">1.00</a> ) | 0.48 ( <a href="#">0.33</a> ) | 0.67 ( <a href="#">0.63</a> ) | 0.63 ( <a href="#">0.59</a> ) |
| <a href="#">BA.3</a>      | 0.00 ( <a href="#">0.00</a> ) | 0.07 ( <a href="#">0.21</a> ) | 0.48 ( <a href="#">0.33</a> ) | 1.00 ( <a href="#">1.00</a> ) | 0.43 ( <a href="#">0.30</a> ) | 0.39 ( <a href="#">0.29</a> ) |
| <a href="#">BA.4</a>      | 0.04 ( <a href="#">0.02</a> ) | 0.08 ( <a href="#">0.08</a> ) | 0.67 ( <a href="#">0.63</a> ) | 0.43 ( <a href="#">0.30</a> ) | 1.00 ( <a href="#">1.00</a> ) | 0.87 ( <a href="#">0.84</a> ) |

BA.5

0.04 ([0.03](#))

0.08 ([0.08](#))

0.63 ([0.59](#))

0.39 ([0.29](#))

0.87 ([0.84](#))

1.00 ([1.00](#))

## Detected mutations

Excluded from this pdf version due to file size limitations.

**CFSAN/OAO**  
**BIostatistics AND BIOinformatics STAFF**

# WASTEWATER SARS-COV2 ANALYSIS REPORT

|                                  |                                                                                                              |
|----------------------------------|--------------------------------------------------------------------------------------------------------------|
| Sample name:                     | unclassified                                                                                                 |
| Date generated:                  | 2023-02-02, 09:12:00 EST                                                                                     |
| Timestamp of C-WAP version used: | Tue Jan 31 11:49:22 2023 -0500                                                                               |
| Executed by:                     | Jasmine Amirzadegan ( <a href="mailto:Jasmine.Amirzadegan@fda.hhs.gov">Jasmine.Amirzadegan@fda.hhs.gov</a> ) |
| Executed on:                     | 172.20.44.125 (aka n125.raven.cfsan)                                                                         |

## Sequencing summary

|                                      |                               |
|--------------------------------------|-------------------------------|
| Sequencing chemistry:                | Missing with Missing          |
| Source site:                         | <a href="#">Missing (?.?)</a> |
| Sampling date:                       | Missing                       |
| Collected by:                        | Missing                       |
| Sequenced by:                        | Missing                       |
| Total number of reads:               | 569329                        |
| Reads aligned:                       | 462289 (81%)                  |
| Average read quality:                | 19.3                          |
| Average read length:                 | 883                           |
| Reads passing filter:                | 462282 (81%)                  |
| Average read quality passing filter: | 19.3                          |
| Average read length passing filter:  | 883                           |
| Average coverage passing filter:     | 13650X                        |

A read passes filter if the read length after adaptor trimming  $\geq 30$  and minimum read quality  $\geq 20$  within a sliding window of width 4.

## Overall sequence characteristics



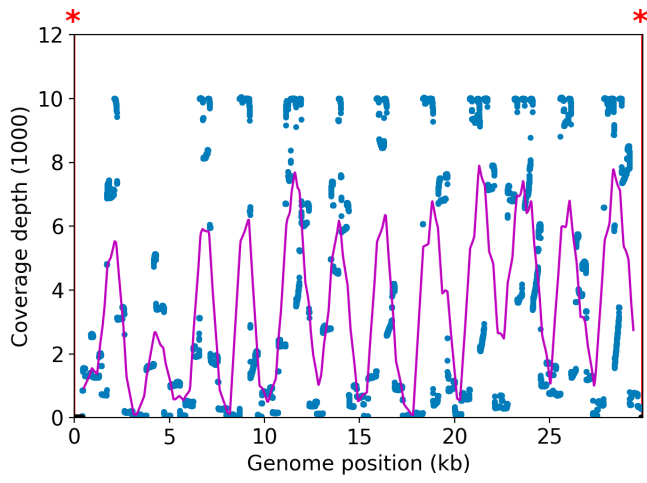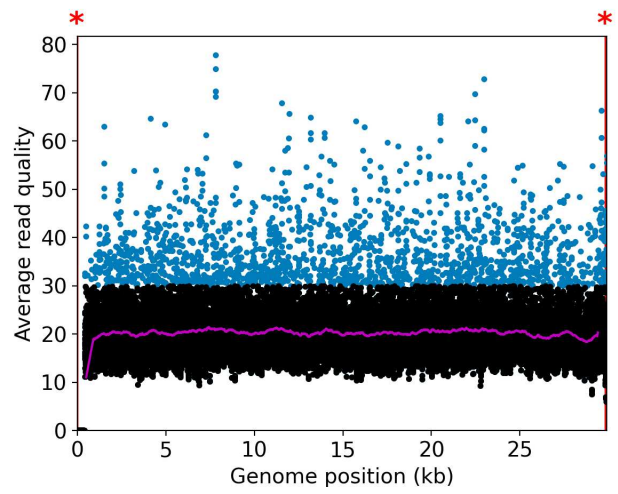

NOTE: The red shaded areas marked with a (\*) are not covered by the design of the library preparation kit and hence excluded from analyses. Magenta curves represent moving average with a window width of 1kb.

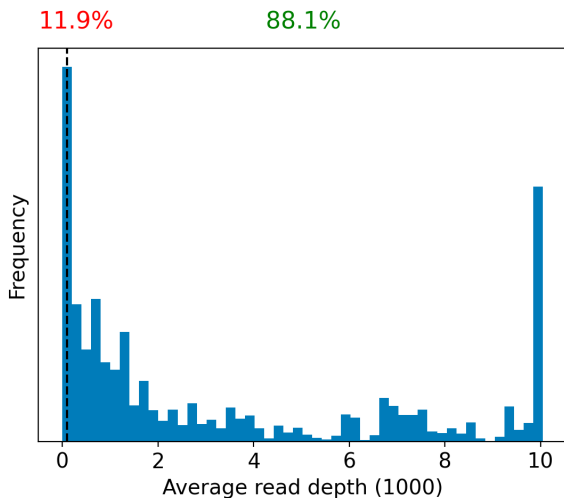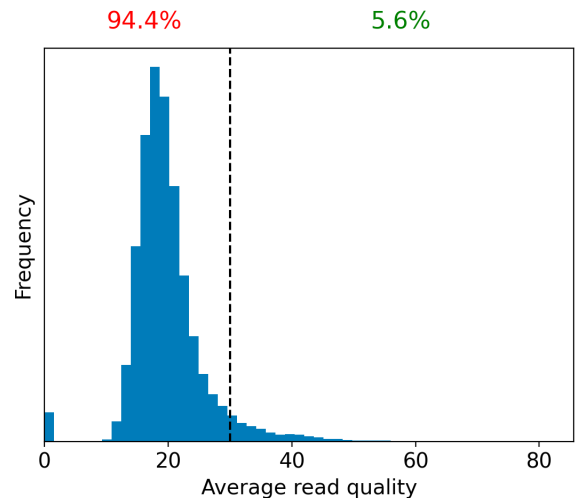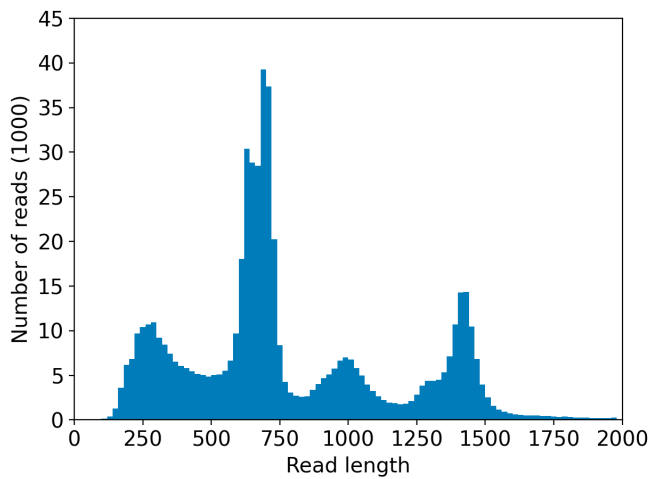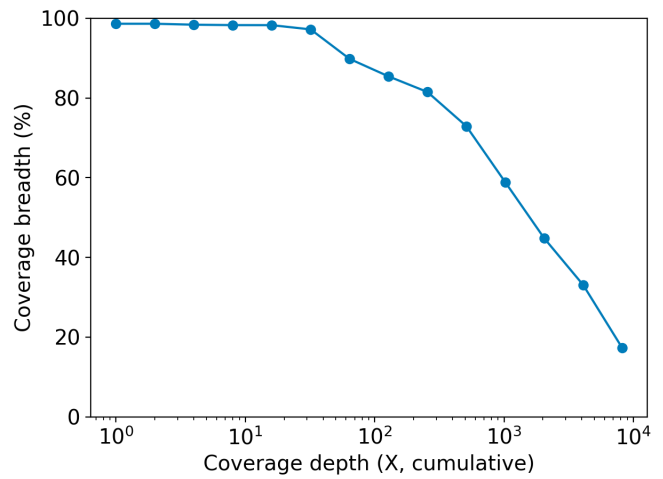

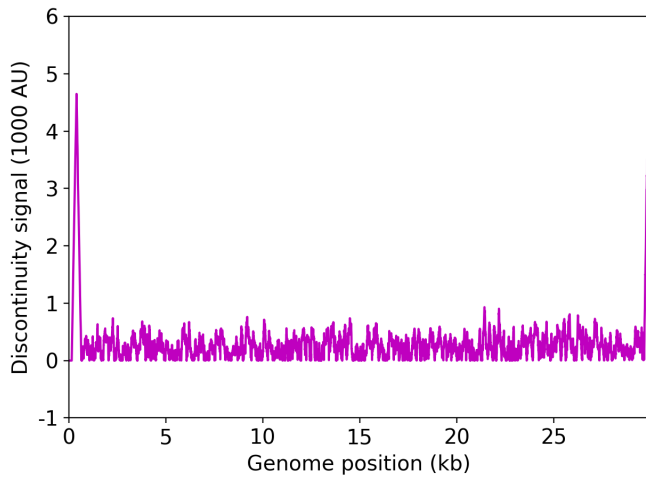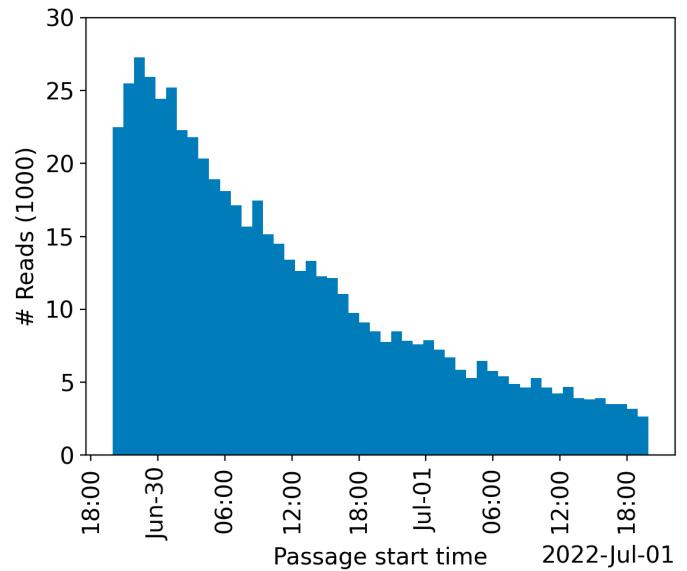

|                                                   | Uncovered coordinates (0X) | Poorly covered coordinates (<10X) |
|---------------------------------------------------|----------------------------|-----------------------------------|
| # Inaccessible genomic coordinates by kit design: | 152nt (0%)                 | 152nt (0%)                        |
| All genomic coordinates:                          | 406nt (1%)                 | 509nt (1%)                        |
| Common SNPs:                                      | 1nt (2%)                   | 1nt (2%)                          |
| Diverse SNPs:                                     | 2nt (0%)                   | 29nt (12%)                        |
| Rare SNPs:                                        | 49nt (5%)                  | 66nt (7%)                         |

SNPs refer to the polymorphic sites currently in circulation that were detected out of recent GISAID entries. The sites that differ from the SC2 reference sequence are denoted as "common" if [90%, 100%] of the submissions carry this mutation, whereas those that are prevalent in [0%,10%] of the submissions are grouped under the "rare" category. The population is still diverse at the mutation sites that are observed in (10%,90%) of the entries and these coordinates are grouped under the "diverse" category.

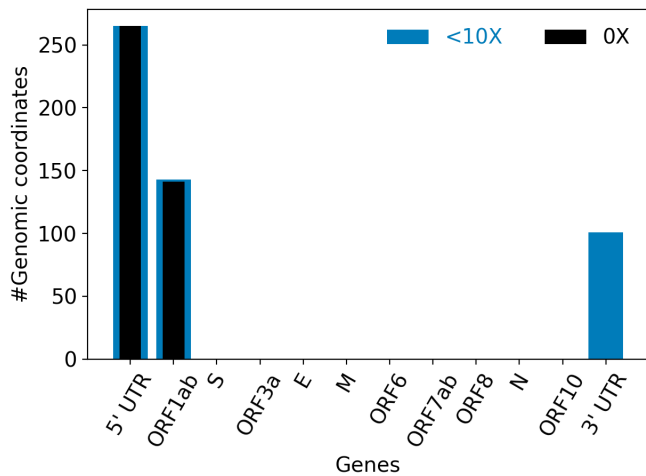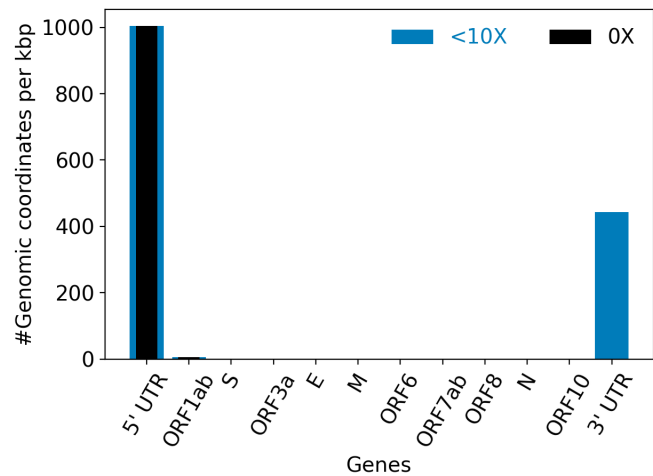

|                                                     |                        |
|-----------------------------------------------------|------------------------|
| Hits to SARS-Cov2 genome (kraken2):                 | 436270 reads (76.63%)  |
| Hits to human genome (kraken2):                     | 45590 reads (8.01%)    |
| Hits to synthetic sequences (kraken2, taxid 28384): | 0 reads (0.00%)        |
|                                                     | Coronaviridae (76.63%) |

Most abundant organisms (kraken2, family level):

Hominidae (8.01%)  
Arcobacteraceae (1.91%)  
Enterobacteriaceae (0.59%)  
Bacteroidaceae (0.18%)

## Detected variants (Experimental)

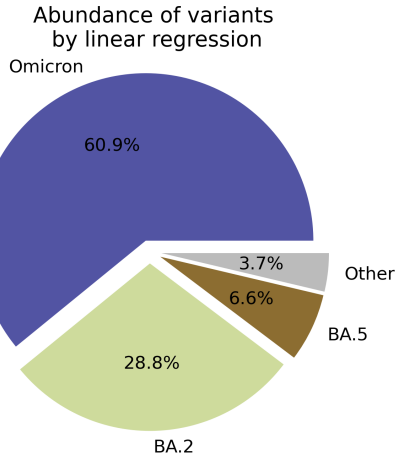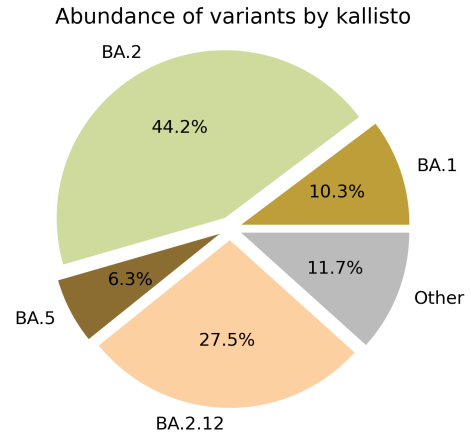

Based on deconvolution, [B.1.1.529](#) is estimated to constitute 60.90% of the viral particles and hence is the most abundant variant in the sample. The  $R^2$  for the linear regression was 0.63. Variants that were detected less than 5% were grouped under "Other"

Based on the consensus sequence of the observed reads, the "ensemble-averaged sequence" most closely resembles the [BA.2](#) lineage. If this is a sample consisting of a single source of pathogens or an overwhelming majority of the different sources are infected with the same variant, the sample is dominated by this variant.

Based on mapping individual reads to the variant consensus sequences in the reference database, kallisto predicts that the sample is dominated by [BA.2](#) lineage. Accuracy of this measure is expected to improve if the input data consists of long reads as opposed to convolution.

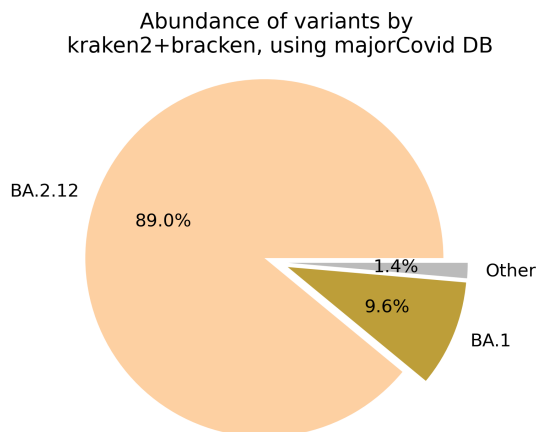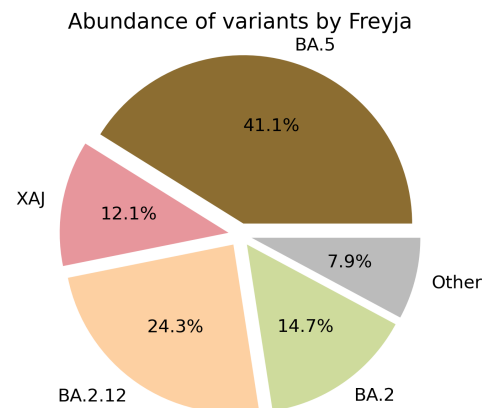

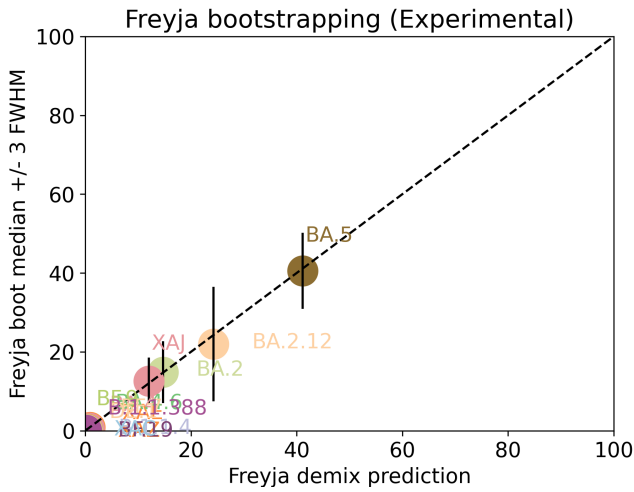

Under the assumption that the presence of a variant requires the detection of all respective mutations of the variant, the characteristic mutations which support the presence of the respective variant are indicated in the respective column of the table. Numbers show the number of mutations detected, if any, and the number of mutations expected to be present based on the variant definitions.

| VOC                               | <a href="#">B.1.617.2</a>                  | <a href="#">BA.1</a>                                                         | <a href="#">BA.2</a>                                                                                                                                                                                                                                                                                                            | <a href="#">BA.3</a>                                                                                                                                                 | <a href="#">BA.4</a>                                                                                                                                                                                                                                                                                      | <a href="#">BA.5</a>                                                                                                                                                                                                                                                        |
|-----------------------------------|--------------------------------------------|------------------------------------------------------------------------------|---------------------------------------------------------------------------------------------------------------------------------------------------------------------------------------------------------------------------------------------------------------------------------------------------------------------------------|----------------------------------------------------------------------------------------------------------------------------------------------------------------------|-----------------------------------------------------------------------------------------------------------------------------------------------------------------------------------------------------------------------------------------------------------------------------------------------------------|-----------------------------------------------------------------------------------------------------------------------------------------------------------------------------------------------------------------------------------------------------------------------------|
| Characteristic mutations detected | (3 of 13)<br>S:G142D<br>S:L452R<br>S:T478K | (5 of 26)<br>M:D3G<br>NUC:C25000T<br>NUC:C25584T<br>ORF1AB:I3758V<br>S:Q493R | (22 of 31)<br>N:S413R<br>NUC:A9424G<br>NUC:C10198T<br>NUC:C12880T<br>NUC:C15714T<br>NUC:C25000T<br>NUC:C25584T<br>NUC:C26858T<br>NUC:C4321T<br>NUC:G10447A<br>ORF1AB:G1307S<br>ORF1AB:L3027F<br>ORF1AB:L3201F<br>ORF1AB:S135R<br>ORF1AB:T3090I<br>ORF1AB:T842I<br>S:D405N<br>S:Q493R<br>S:R408S<br>S:S371F<br>S:T19I<br>S:T376A | (11 of 21)<br>N:S413R<br>NUC:C12880T<br>NUC:C15714T<br>NUC:C26858T<br>NUC:G10447A<br>ORF1AB:G1307S<br>ORF1AB:S135R<br>ORF1AB:T3090I<br>S:D405N<br>S:Q493R<br>S:S371F | (21 of 31)<br>N:S413R<br>NUC:C10198T<br>NUC:C12880T<br>NUC:C15714T<br>NUC:C25000T<br>NUC:C25584T<br>NUC:C26858T<br>NUC:C4321T<br>NUC:G10447A<br>NUC:G27788T<br>ORF1AB:G1307S<br>ORF1AB:S135R<br>ORF1AB:T3090I<br>ORF1AB:T842I<br>S:D405N<br>S:F486V<br>S:L452R<br>S:S371F<br>S:T19I<br>S:T376A<br>S:V213G | (19 of 28)<br>N:S413R<br>NUC:C10198T<br>NUC:C12880T<br>NUC:C15714T<br>NUC:C25000T<br>NUC:C25584T<br>NUC:C4321T<br>NUC:G10447A<br>ORF1AB:G1307S<br>ORF1AB:S135R<br>ORF1AB:T3090I<br>ORF1AB:T842I<br>S:D405N<br>S:F486V<br>S:L452R<br>S:S371F<br>S:T19I<br>S:T376A<br>S:V213G |

**Jaccard Index** is a measure of similarity between two sets A and B, reaching the maximum value of 1 if A=B and minimum value of 0 if  $A \cap B = \{\}$ . In the c(d) representation below, c represents the Jaccard index of the set of mutations that were experimentally detected for this sample as listed above, whereas d refers to the ideal value of the Jaccard index expected from complete genome coverage without any sequencing errors.

|                           | <a href="#">B.1.617.2</a>     | <a href="#">BA.1</a>          | <a href="#">BA.2</a>          | <a href="#">BA.3</a>          | <a href="#">BA.4</a>          | <a href="#">BA.5</a>          |
|---------------------------|-------------------------------|-------------------------------|-------------------------------|-------------------------------|-------------------------------|-------------------------------|
| <a href="#">B.1.617.2</a> | 1.00 ( <a href="#">1.00</a> ) | 0.00 ( <a href="#">0.00</a> ) | 0.00 ( <a href="#">0.00</a> ) | 0.00 ( <a href="#">0.00</a> ) | 0.04 ( <a href="#">0.02</a> ) | 0.05 ( <a href="#">0.03</a> ) |
| <a href="#">BA.1</a>      | 0.00 ( <a href="#">0.00</a> ) | 1.00 ( <a href="#">1.00</a> ) | 0.12 ( <a href="#">0.10</a> ) | 0.07 ( <a href="#">0.21</a> ) | 0.08 ( <a href="#">0.08</a> ) | 0.09 ( <a href="#">0.08</a> ) |
| <a href="#">BA.2</a>      | 0.00 ( <a href="#">0.00</a> ) | 0.12 ( <a href="#">0.10</a> ) | 1.00 ( <a href="#">1.00</a> ) | 0.50 ( <a href="#">0.33</a> ) | 0.65 ( <a href="#">0.63</a> ) | 0.64 ( <a href="#">0.59</a> ) |
| <a href="#">BA.3</a>      | 0.00 ( <a href="#">0.00</a> ) | 0.07 ( <a href="#">0.21</a> ) | 0.50 ( <a href="#">0.33</a> ) | 1.00 ( <a href="#">1.00</a> ) | 0.45 ( <a href="#">0.30</a> ) | 0.43 ( <a href="#">0.29</a> ) |
| <a href="#">BA.4</a>      | 0.04 ( <a href="#">0.02</a> ) | 0.08 ( <a href="#">0.08</a> ) | 0.65 ( <a href="#">0.63</a> ) | 0.45 ( <a href="#">0.30</a> ) | 1.00 ( <a href="#">1.00</a> ) | 0.90 ( <a href="#">0.84</a> ) |
| <a href="#">BA.5</a>      | 0.05 ( <a href="#">0.03</a> ) | 0.09 ( <a href="#">0.08</a> ) | 0.64 ( <a href="#">0.59</a> ) | 0.43 ( <a href="#">0.29</a> ) | 0.90 ( <a href="#">0.84</a> ) | 1.00 ( <a href="#">1.00</a> ) |

BA.5

0.05 ([0.03](#))

0.09 ([0.08](#))

0.64 ([0.59](#))

0.43 ([0.29](#))

0.90 ([0.84](#))

1.00 ([1.00](#))

## Detected mutations

Excluded from this pdf version due to file size limitations.

**CFSAN/OAO**  
**BIostatistics AND BIOinformatics STAFF**

# WASTEWATER SARS-COV2 ANALYSIS REPORT

|                                  |                                                                                                              |
|----------------------------------|--------------------------------------------------------------------------------------------------------------|
| Sample name:                     | Water                                                                                                        |
| Date generated:                  | 2023-02-02, 08:50:56 EST                                                                                     |
| Timestamp of C-WAP version used: | Tue Jan 31 11:49:22 2023 -0500                                                                               |
| Executed by:                     | Jasmine Amirzadegan ( <a href="mailto:Jasmine.Amirzadegan@fda.hhs.gov">Jasmine.Amirzadegan@fda.hhs.gov</a> ) |
| Executed on:                     | 172.20.44.121 (aka n121.raven.cfsan)                                                                         |

## Sequencing summary

| Sequencing chemistry:                | Missing with Missing          |
|--------------------------------------|-------------------------------|
| Source site:                         | <a href="#">Missing (?.?)</a> |
| Sampling date:                       | Missing                       |
| Collected by:                        | Missing                       |
| Sequenced by:                        | Missing                       |
| Total number of reads:               | 2964                          |
| Reads aligned:                       | 2896 (97%)                    |
| Average read quality:                | 20.8                          |
| Average read length:                 | 688                           |
| Reads passing filter:                | 2896 (97%)                    |
| Average read quality passing filter: | 20.8                          |
| Average read length passing filter:  | 688                           |
| Average coverage passing filter:     | 66X                           |

A read passes filter if the read length after adaptor trimming  $\geq 30$  and minimum read quality  $\geq 20$  within a sliding window of width 4.

## Overall sequence characteristics

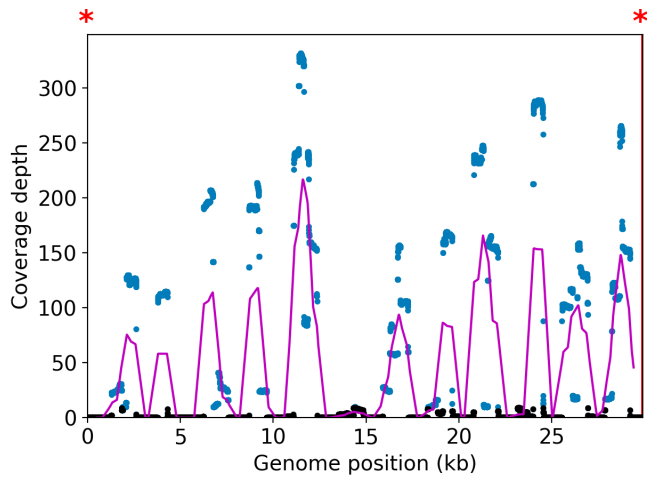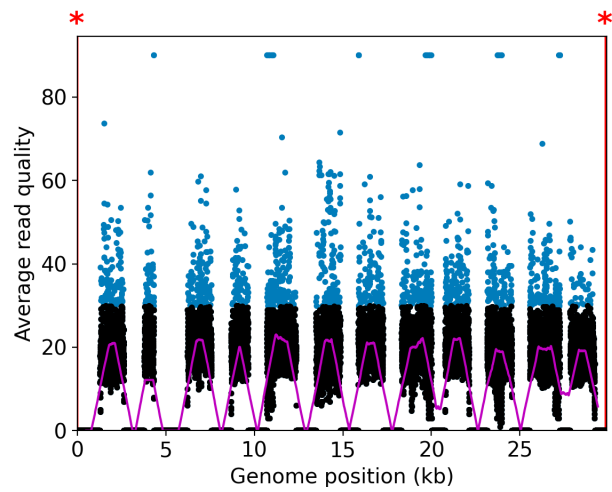

NOTE: The red shaded areas marked with a (\*) are not covered by the design of the library preparation kit and hence excluded from analyses. Magenta curves represent moving average with a window width of 1kb.

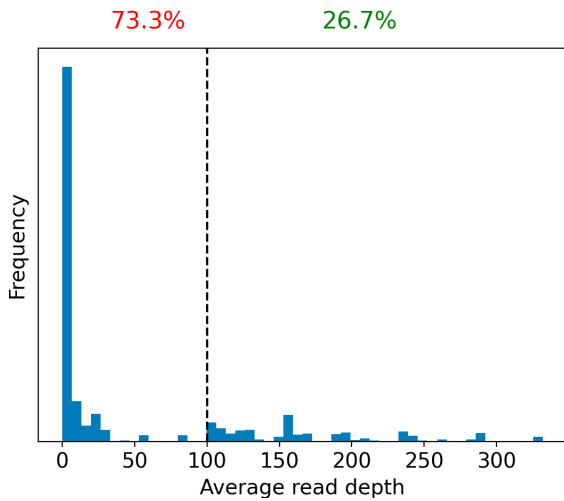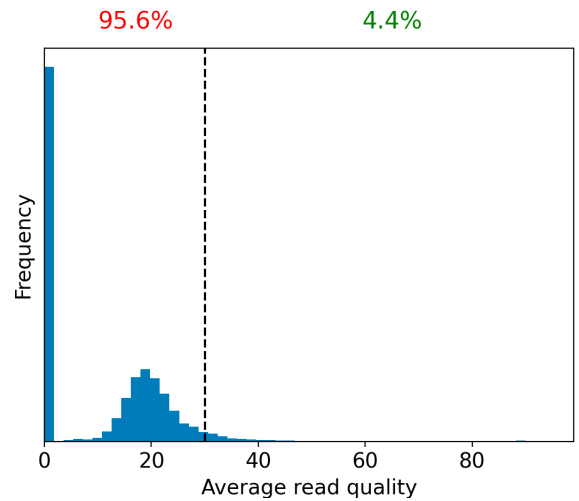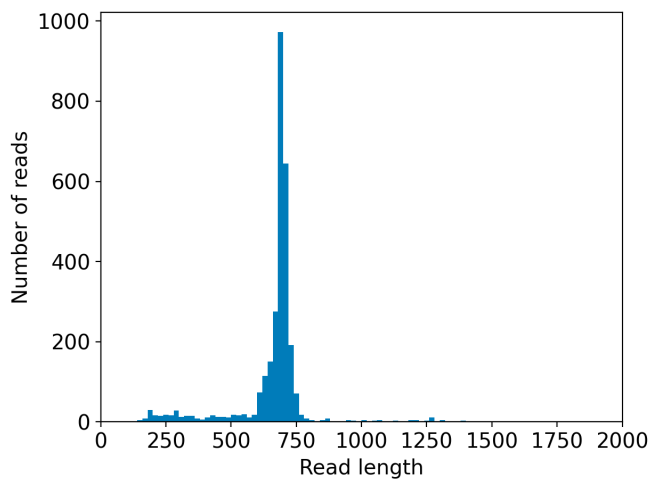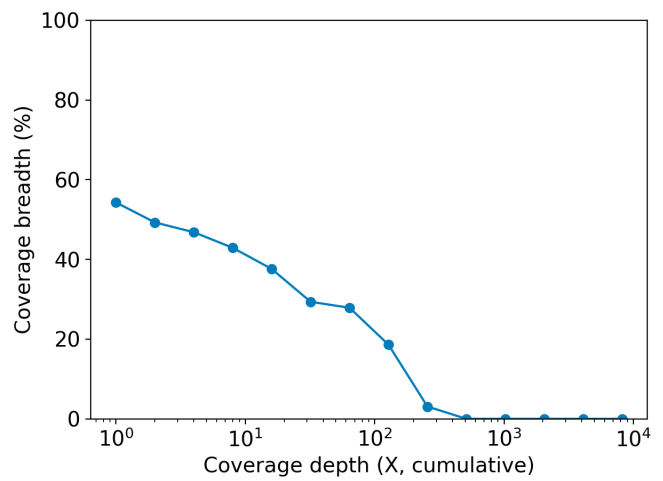

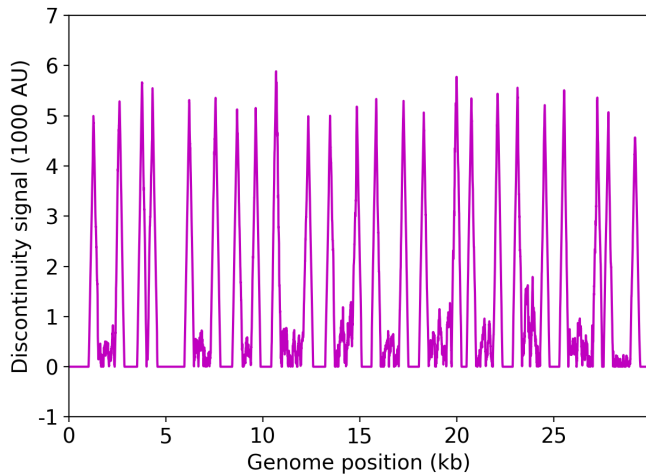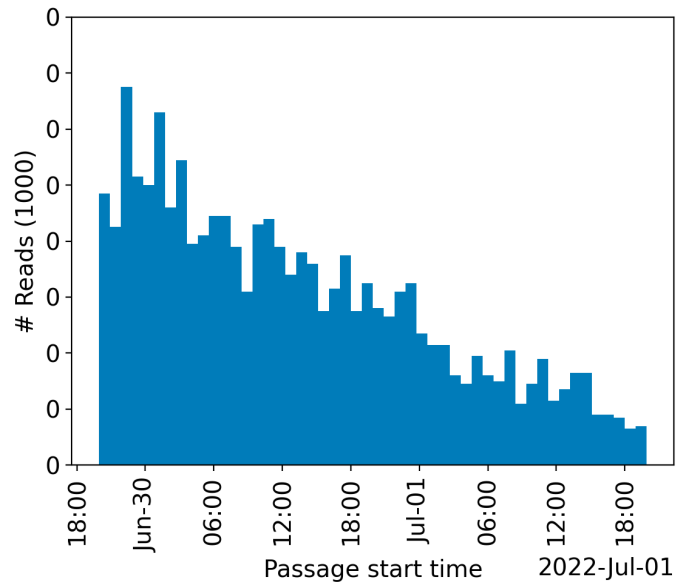

|                                                   | Uncovered coordinates (0X) | Poorly covered coordinates (<10X) |
|---------------------------------------------------|----------------------------|-----------------------------------|
| # Inaccessible genomic coordinates by kit design: | 152nt (0%)                 | 152nt (0%)                        |
| All genomic coordinates:                          | 13665nt (45%)              | 17534nt (58%)                     |
| Common SNPs:                                      | 16nt (44%)                 | 22nt (61%)                        |
| Diverse SNPs:                                     | 91nt (40%)                 | 187nt (83%)                       |
| Rare SNPs:                                        | 681nt (73%)                | 807nt (87%)                       |

SNPs refer to the polymorphic sites currently in circulation that were detected out of recent GISAID entries. The sites that differ from the SC2 reference sequence are denoted as "common" if [90%, 100%] of the submissions carry this mutation, whereas those that are prevalent in [0%,10%] of the submissions are grouped under the "rare" category. The population is still diverse at the mutation sites that are observed in (10%,90%) of the entries and these coordinates are grouped under the "diverse" category.

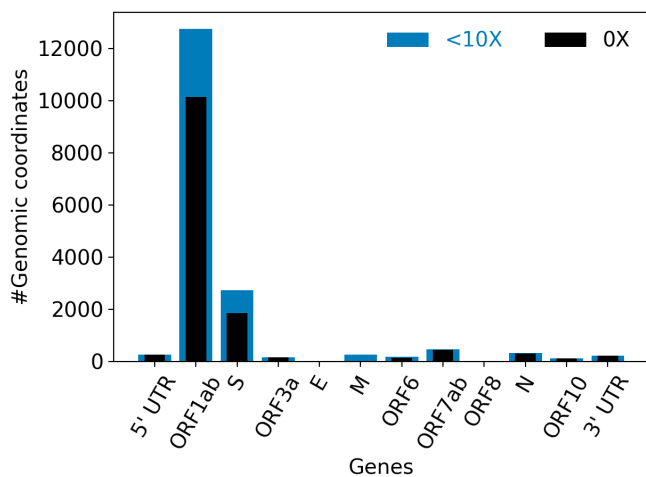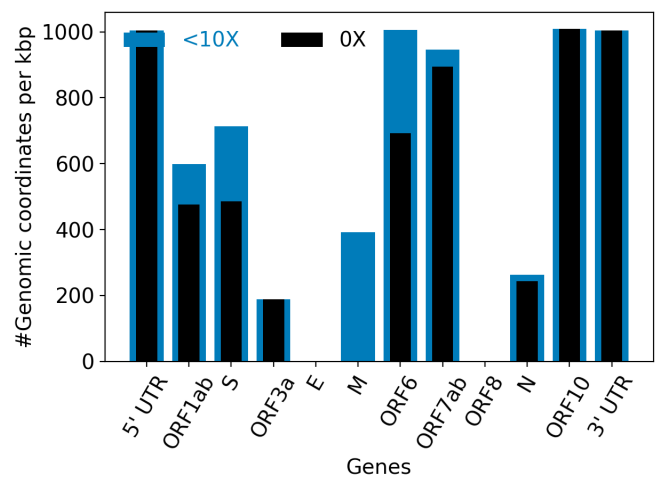

|                                                     |                        |
|-----------------------------------------------------|------------------------|
| Hits to SARS-Cov2 genome (kraken2):                 | 2866 reads (96.69%)    |
| Hits to human genome (kraken2):                     | 11 reads (0.37%)       |
| Hits to synthetic sequences (kraken2, taxid 28384): | 0 reads (0.00%)        |
|                                                     | Coronaviridae (96.69%) |



Most abundant organisms (kraken2, family level):

Hominidae (0.37%)  
Arcobacteraceae (0.03%)  
Oscillospiraceae (0.03%)  
Halorubraceae (0.03%)

## Detected variants (Experimental)

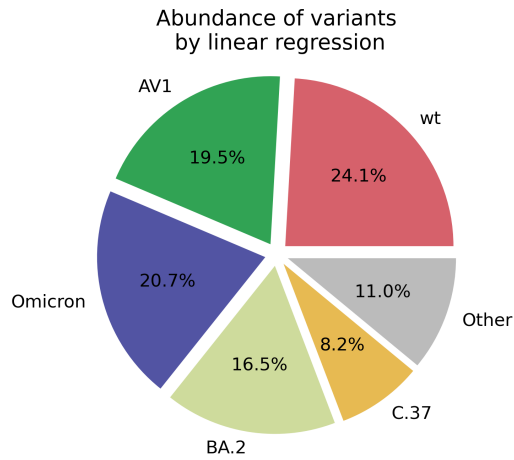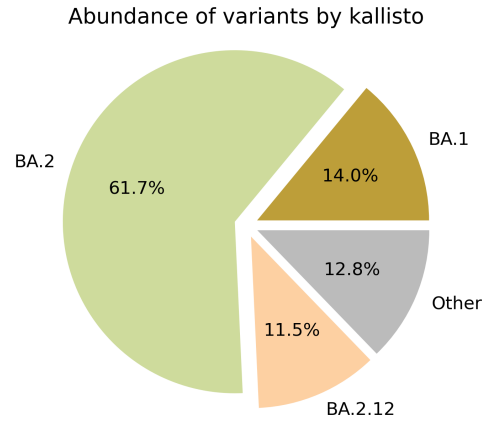

Based on deconvolution, [wt](#) is estimated to constitute 23.76% of the viral particles and hence is the most abundant variant in the sample. The  $R^2$  for the linear regression was 0.19. Variants that were detected less than 5% were grouped under "Other"

Based on the consensus sequence of the observed reads, the "ensemble-averaged sequence" most closely resembles the [B.1.1](#) lineage. If this is a sample consisting of a single source of pathogens or an overwhelming majority of the different sources are infected with the same variant, the sample is dominated by this variant.

Based on mapping individual reads to the variant consensus sequences in the reference database, kallisto predicts that the sample is dominated by [BA.2](#) lineage. Accuracy of this measure is expected to improve if the input data consists of long reads as opposed to convolution.

Abundance of variants by kraken2+bracken, using majorCovid DB  
BA.2.12

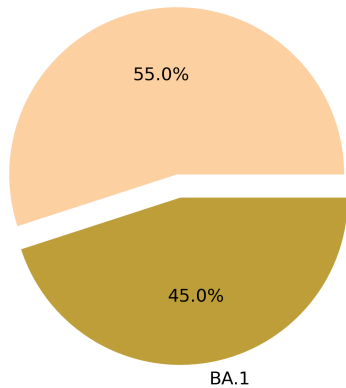

Abundance of variants by Freyja

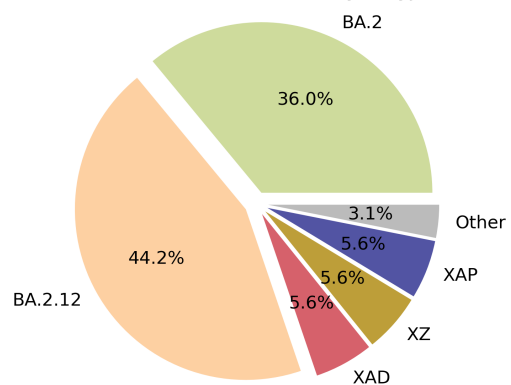

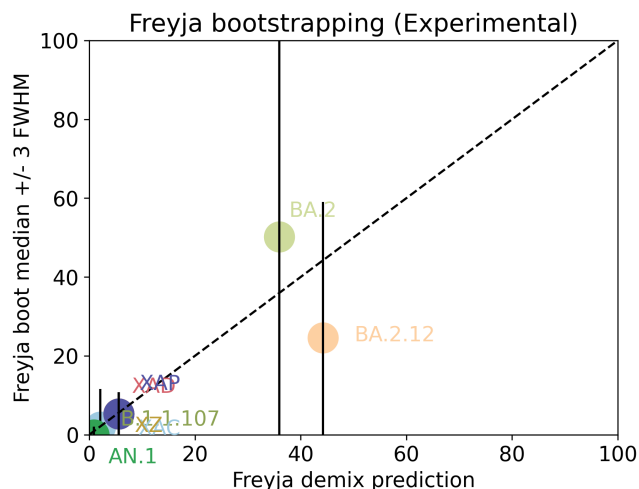

Under the assumption that the presence of a variant requires the detection of all respective mutations of the variant, the characteristic mutations which support the presence of the respective variant are indicated in the respective column of the table. Numbers show the number of mutations detected, if any, and the number of mutations expected to be present based on the variant definitions.

| VOC                               | <a href="#">B.1.617.2</a> | <a href="#">BA.1</a>                               | <a href="#">BA.2</a>                                                                                 | <a href="#">BA.3</a>                                       | <a href="#">BA.4</a>                                                                | <a href="#">BA.5</a>                                                 |
|-----------------------------------|---------------------------|----------------------------------------------------|------------------------------------------------------------------------------------------------------|------------------------------------------------------------|-------------------------------------------------------------------------------------|----------------------------------------------------------------------|
| Characteristic mutations detected | (1 of 13)<br>S:G142D      | (3 of 26)<br>M:D3G<br>NUC:C25584T<br>ORF1AB:I3758V | (6 of 31)<br>NUC:C25584T<br>NUC:C26858T<br>ORF1AB:G1307S<br>ORF1AB:L3027F<br>ORF1AB:T3090I<br>S:T19I | (3 of 21)<br>NUC:C26858T<br>ORF1AB:G1307S<br>ORF1AB:T3090I | (5 of 31)<br>NUC:C25584T<br>NUC:C26858T<br>ORF1AB:G1307S<br>ORF1AB:T3090I<br>S:T19I | (4 of 28)<br>NUC:C25584T<br>ORF1AB:G1307S<br>ORF1AB:T3090I<br>S:T19I |

[Jaccard Index](#) is a measure of similarity between two sets A and B, reaching the maximum value of 1 if  $A=B$  and minimum value of 0 if  $A \cap B = \{\}$ . In the c(d) representation below, c represents the Jaccard index of the set of mutations that were experimentally detected for this sample as listed above, whereas d refers to the ideal value of the Jaccard index expected from complete genome coverage without any sequencing errors.

|                           | <a href="#">B.1.617.2</a>     | <a href="#">BA.1</a>          | <a href="#">BA.2</a>          | <a href="#">BA.3</a>          | <a href="#">BA.4</a>          | <a href="#">BA.5</a>          |
|---------------------------|-------------------------------|-------------------------------|-------------------------------|-------------------------------|-------------------------------|-------------------------------|
| <a href="#">B.1.617.2</a> | 1.00 ( <a href="#">1.00</a> ) | 0.00 ( <a href="#">0.00</a> ) | 0.00 ( <a href="#">0.00</a> ) | 0.00 ( <a href="#">0.00</a> ) | 0.00 ( <a href="#">0.02</a> ) | 0.00 ( <a href="#">0.03</a> ) |
| <a href="#">BA.1</a>      | 0.00 ( <a href="#">0.00</a> ) | 1.00 ( <a href="#">1.00</a> ) | 0.12 ( <a href="#">0.10</a> ) | 0.00 ( <a href="#">0.21</a> ) | 0.14 ( <a href="#">0.08</a> ) | 0.17 ( <a href="#">0.08</a> ) |
| <a href="#">BA.2</a>      | 0.00 ( <a href="#">0.00</a> ) | 0.12 ( <a href="#">0.10</a> ) | 1.00 ( <a href="#">1.00</a> ) | 0.50 ( <a href="#">0.33</a> ) | 0.83 ( <a href="#">0.63</a> ) | 0.67 ( <a href="#">0.59</a> ) |
| <a href="#">BA.3</a>      | 0.00 ( <a href="#">0.00</a> ) | 0.00 ( <a href="#">0.21</a> ) | 0.50 ( <a href="#">0.33</a> ) | 1.00 ( <a href="#">1.00</a> ) | 0.60 ( <a href="#">0.30</a> ) | 0.40 ( <a href="#">0.29</a> ) |
| <a href="#">BA.4</a>      | 0.00 ( <a href="#">0.02</a> ) | 0.14 ( <a href="#">0.08</a> ) | 0.83 ( <a href="#">0.63</a> ) | 0.60 ( <a href="#">0.30</a> ) | 1.00 ( <a href="#">1.00</a> ) | 0.80 ( <a href="#">0.84</a> ) |
| <a href="#">BA.5</a>      | 0.00 ( <a href="#">0.03</a> ) | 0.17 ( <a href="#">0.08</a> ) | 0.67 ( <a href="#">0.59</a> ) | 0.40 ( <a href="#">0.29</a> ) | 0.80 ( <a href="#">0.84</a> ) | 1.00 ( <a href="#">1.00</a> ) |

## Detected mutations

Excluded from this pdf version due to file size limitations.
